# Supplementary material for: Design, synthesis and bioevaluation of novel N-heterocyclic hydroxamic acids as histone deacetylase inhibitors and their antitumor activity study
Source: Royal Society of Chemistry journal article supplement (doi:10.1039/d4nj03452j), 2024-01-01

## SUPPLEMENTAL MATERIALS

for

### Design, synthesis and bioevaluation of novel N-heterocyclic hydroxamic acids as histone deacetylase inhibitors and their antitumor activity study

Nguyen Quoc Thang,<sup>a</sup> Nguyen Thi Nga,<sup>a</sup> Ji Su Kim,<sup>b</sup> Hwa Kyung Kim,<sup>b</sup> Jiyeon Kim,<sup>b</sup> Jong Soon Kang,<sup>c</sup> Truong Thanh Tung,<sup>d</sup> Do Thi Mai Dung,<sup>\*,a</sup> Duong Tien Anh,<sup>\*,a</sup> Sang-Bae Han,<sup>\*,b</sup> Nguyen-Hai Nam,<sup>\*,a</sup>

<sup>a</sup>*Hanoi University of Pharmacy, 13-15 Le Thanh Tong, Hanoi, Vietnam*

<sup>b</sup>*College of Pharmacy, Chungbuk National University, 194-31, Osongsaengmyung-1, Heungdeok, Cheongju, Chungbuk, 28160, Republic of Korea*

<sup>c</sup>*Korea Research Institute of Bioscience and Biotechnology, Cheongju, Chungbuk, Republic of Korea*

<sup>d</sup>*Faculty of Pharmacy, PHENIKAA University, Hanoi, 12116, Vietnam*

**Keywords:** Histone deacetylase (HDAC) inhibitors, hydroxamic acids, benzothiazole, N-hydroxypropenamides, benzimidazole.

**\*Corresponding authors:** Tel.: +84-4-39330531; Fax: +84-4-39332332; Emails: [namnh@hup.edu.vn](mailto:namnh@hup.edu.vn) (N.H. Nam & Dung D.T.M); [anhdt@hup.edu.vn](mailto:anhdt@hup.edu.vn) (D.T. Anh) [shan@chungbuk.ac.kr](mailto:shan@chungbuk.ac.kr) (S.B. Han).

## Contents:

|                                                                                     |           |
|-------------------------------------------------------------------------------------|-----------|
| <b>1. Materials and Methods</b> .....                                               | <b>S1</b> |
| 1.1. Chemistry.....                                                                 | S1        |
| 1.2. Synthesis of library compounds.....                                            | S1        |
| 1.3. Biology.....                                                                   | S4        |
| <b>2. All <sup>1</sup>H &amp; <sup>13</sup>C NMR spectra of the compounds</b> ..... | <b>S6</b> |

## 1. Materials and Methods

### 1.1. Chemistry

Thin layer chromatography which was performed using Whatman® 250 µm Silica Gel GF Uniplates and visualized under UV light at 254 and 365 nm, was used to check the progress of reactions and preliminary evaluation of compounds' homogeneity. Melting points were measured using a Gallenkamp Melting Point Apparatus (LabMerchant, London, United Kingdom) and are uncorrected. Purification of compounds was carried out using crystallization methods and/or open silica gel column flash chromatography employing Merck silica gel 60 (240 to 400 mesh) as stationary phase. Nuclear magnetic resonance spectra (<sup>1</sup>H NMR) were recorded on a Bruker 500 MHz spectrometer with DMSO-*d*<sub>6</sub> as solvent unless otherwise indicated. Tetramethylsilane was used as an internal standard. Chemical shifts are reported in parts per million (ppm), downfield from tetramethylsilane. Mass spectra with different ionization modes including electron ionization (EI), Electrospray ionization (ESI), were recorded using PE Biosystems API2000 (Perkin Elmer, Palo Alto, CA, USA) and Mariner® (Azco Biotech, Inc. Oceanside, CA, USA) mass spectrometers, respectively. The elemental (C, H, N) analyses were performed on a Perkin Elmer model 2400 elemental analyzer. All reagents and solvents were purchased from Aldrich or Fluka Chemical Corp. (Milwaukee, WI, USA) or Merck unless noted otherwise. Solvents were used directly as purchased unless otherwise indicated.

### 1.2. Synthesis of library compounds

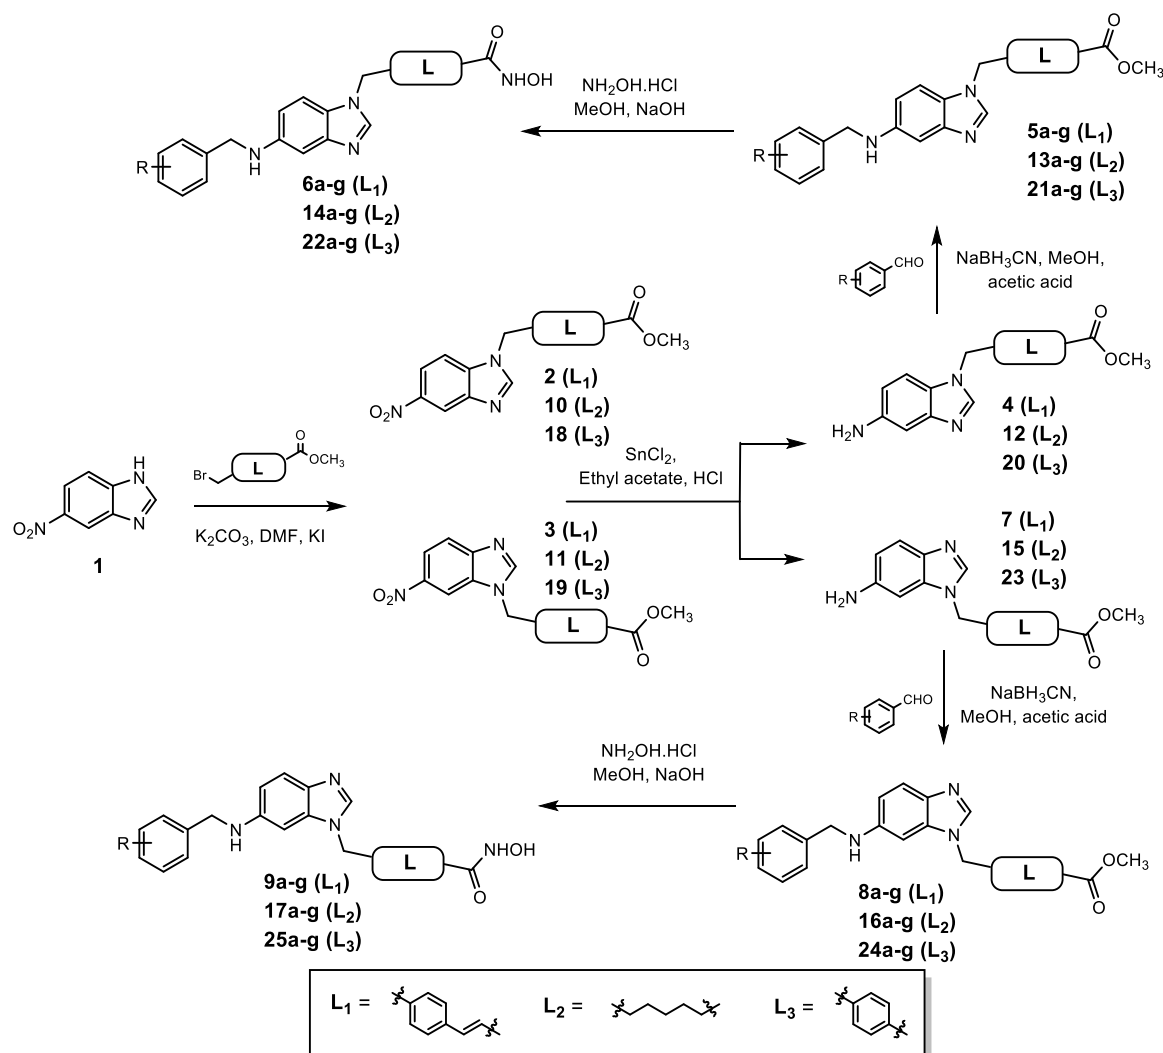

**Scheme 1.** Synthesis of 1H-benzo[d]imidazole-based hydroxamic acids *via* reductive amination  
General procedures for the synthesis of compounds **6a-g**, **9a-g**

To a solution of 5-nitro-1*H*-benzo[d]imidazole (**1**) (4.0 mmol) in dry DMF (10 mL) was added K<sub>2</sub>CO<sub>3</sub> (685 mg, 5.0 mmol). The resulting mixture was heated at 60 °C for 60 minutes, then KI (33.2 mg, 0.2 mmol) was added. After stirring for further 15 minutes, methyl 4-bromomethylcinnamate (4.0 mmol) diluted with DMF (2 mL) was dropwise added into the mixture. The reaction mixture was again stirred at 60 °C until the reaction finished (checked by TLC). Subsequently, the mixture was cooled to room temperature, followed by being poured into ice-cold water (30 mL). The obtained light-yellow precipitate was filtered off, washed with water, and dried at 40 °C under a vacuum for 24 hours. The crude product was used directly for the next step without further purification.

Next, the raw material (3 mmol) from the previous step was dissolved in ethyl acetate (30 mL). Then, tin(II) chloride dihydrate (3.38 g, 15 mmol) and 2 drops of glacial acetic acid were added to the mixture and stirring was continued for 4 h. After completion of the reaction, the resulting mixture was cooled, poured into water (50 mL). The aqueous phase was neutralized with sodium carbonate. Celite was used as the filtration medium to remove fine solids such as metal salts and metal hydroxides from reaction mixture. The mixture after filtration was extracted with ethyl acetate (3 x 30 mL). The combined organic layer was washed with brine, dried over sodium sulfate anhydrous, and evaporated under reduced pressure to give the crude products. The residue was purified by column chromatography (silica gel, DCM: MeOH = 98:2) to give two intermediate reductive product isomers **4** and **7**.

In the next step, the aromatic amines **4** or **7** (1 mmol) was dissolved in methanol (10 mL), then 2 drops of concentrated acetic acid, followed by aldehydes (1.0 mmol) was added. After stirring for further 15 minutes, sodium cyanoborohydride (NaBH<sub>3</sub>CN) (50 mg) diluted with methanol (1 mL) was dropwise added into the mixture. The mixture was stirred at room temperature until the starting materials were consumed completely (6-8 hours). The resulting mixtures were evaporated under reduced pressure to give the residues, then 10 mL water was added. The aqueous phase was extracted with DCM, and the combined organic layer was evaporated under reduced pressure to give the residue. The crude material was purified via open chromatography (silica gel, DCM: MeOH = 96:4) to afford the yellowish oil (**5a-g**, **8a-g**).

Finally, each of the intermediate esters (**5a-g**, **8a-g**) was dissolved in methanol (10 mL). Then, hydroxylamine hydrochloride (685 mg, 10 mmol) was added, followed by dropwise addition of a solution of NaOH (400 mg in 1 mL of water). The mixture was stirred at 0 °C until the reaction completed (1-2 h). At the end of this reaction, the resulting reaction mixture was poured into ice-cold water, neutralised to pH~7, then acidified by dropwise addition of a solution of HCl 5% to induce the maximum precipitation. The precipitates were filtered, dried and re-crystallised in methanol to give the desired compounds **6a-g** and **9a-g**.

#### *General procedures for the synthesis of compounds 14a-g, 17a-g*

Compounds **14a-g** and **17a-g** were synthesized by a similar synthetic pathway described for **6a-g**, **9a-g**, except that methyl 7-bromoheptanoate was used instead of methyl (*E*)-4-bromomethylcinnamate (Scheme 1).

#### *General procedures for the synthesis of compounds 22a-g, 25a-g*

Compounds **22a-g** and **25a-g** were prepared following a synthetic route analogous to that outlined for **6a-g** and **9a-g**, with the only difference being the substitution of methyl 4-bromomethylbenzoate for methyl (*E*)-4-bromomethylcinnamate, as illustrated in Scheme 1.

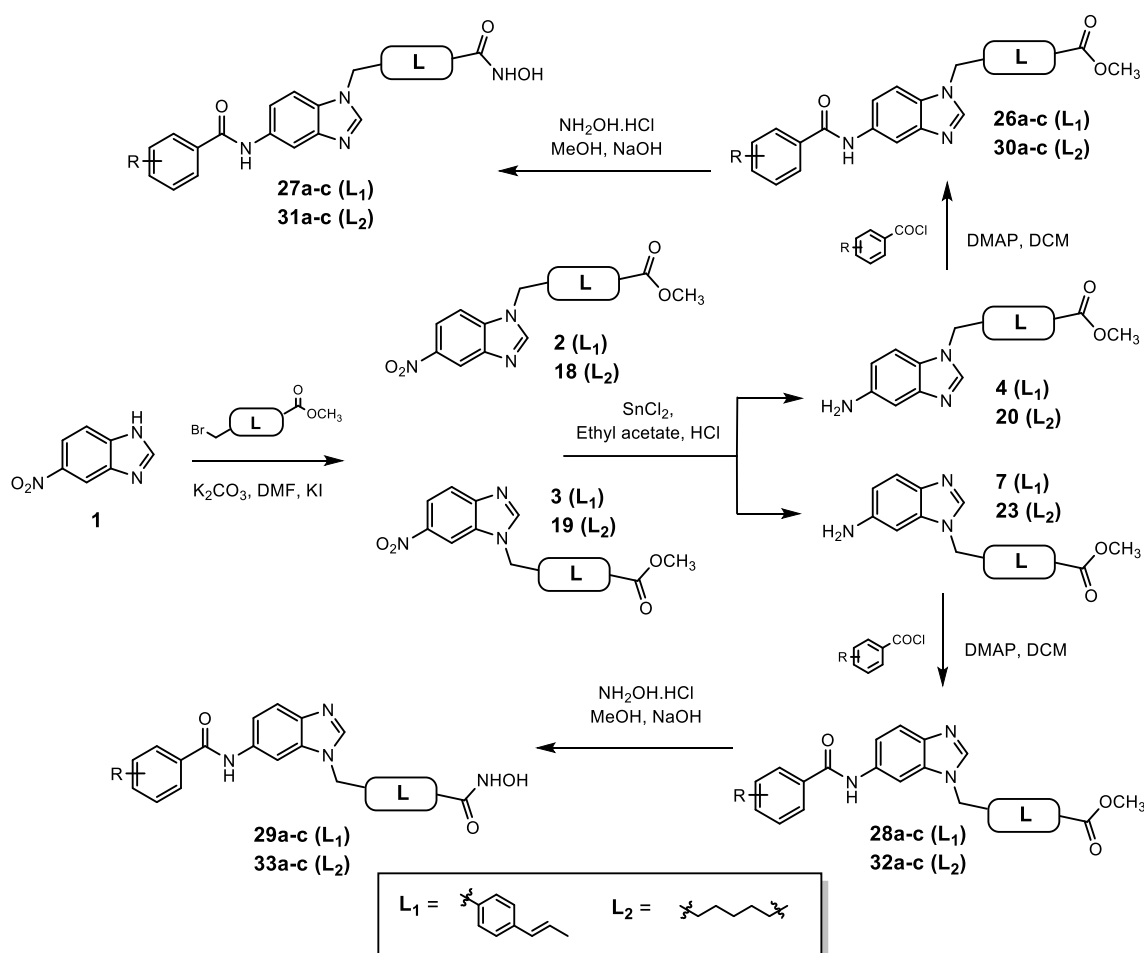

**Scheme 2.** Synthesis of 1*H*-benzo[d]imidazole-based hydroxamic acids *via* amide coupling reaction

*General procedures for the synthesis of compounds 27a-c, 29a-c*

Compounds **27a-c** and **29a-c** were synthesized via a four-step pathway as illustrated in Scheme 2. The first two reactions in the synthetic pathway of these compounds were similar to those in the synthesis of **6a-g**, **9a-g**.

In the next step, the aromatic amines **4** or **7** (1 mmol) were dissolved in 30 mL DCM, and DMAP (122 mg, 1 mmol) was added. After stirring for 10 minutes, a respective benzoyl chloride (1.2 mmol) was added. The reaction mixture was stirred at 40 °C for 12 hours. After the reaction was finished (monitored by TLC), the solvent was removed in vacuo. A solution of NaHCO<sub>3</sub> 5% was gradually added to adjust pH to 7, which led to the formation of white solids. The solids were filtered, washed with cold water and dried at 60 °C. The crude product was further purified by column chromatography (DCM/methanol = 95:5) to give the corresponding derivatives **26a-c** and **28a-c**, yields 72-81%.

In the final step, each of the intermediate esters **26** or **28** (0.5 mmol) was dissolved in methanol (10 mL). Then, hydroxylamine hydrochloride (343 mg, 5 mmol) was added, followed by dropwise addition of a solution of NaOH (200 mg in 1 mL of water). The mixture was stirred at 0 °C until the reaction completed (1-2 h, checked by TLC). At the end of this reaction, the resulting reaction mixture was poured into ice-cold water, neutralised to pH~7 and acidified by dropwise addition of a solution of HCl 5% to induce the maximum precipitation. The precipitates were filtered, dried and re-crystallised in methanol to give the designed hydroxamic acids **27a-c**, **29a-c**.

*General procedures for the synthesis of compounds 31a-c, 33a-c*

Compounds **31a-c** and **33a-c** were produced following a synthetic route akin to the one delineated for **27a-c** and **29a-c**, with the modification of employing methyl 4-bromoheptanoate instead of methyl (*E*)-4-bromomethylcinnamate, as depicted in Scheme 2.

### 1.3. Biology

#### Cytotoxicity assay

The cytotoxicity of the synthesized compounds was evaluated against three cell lines, including SW620 (colon cancer), MDA-MB-231 (breast cancer), MRC-5 (human fetal lung fibroblast cells). The cell lines were purchased from a Cancer Cell Bank at the Korea Research Institute of Bioscience and Biotechnology (KRIBB). The media, sera and other reagents that were used for cell culture in this assay were obtained from GIBCO Co. Ltd. (Grand Island, New York, USA). The cells were cultured in DMEM (Dulbecco's Modified Eagle Medium) until confluence. The cells were then trypsinized and suspended at  $3 \times 10^4$  cells/mL of cell culture medium. On day 0, each well of the 96-well plates was seeded with 180  $\mu$ L of cell suspension. The plates were then incubated in a 5% CO<sub>2</sub> incubator at 37 °C for 24 h. Compounds were initially dissolved in dimethyl sulfoxide (DMSO) and diluted to appropriate concentrations by culture medium. Then 20  $\mu$ L of each compounds' samples, which were prepared as described above, were added to each well of the 96-well plates, which had been seeded with cell suspension and incubated for 24-h, at various concentrations. The plates were further incubated for 48 h. Cytotoxicity of the compounds was measured by the colorimetric method, as described previously [26] with slight modifications [27-29]. The IC<sub>50</sub> values were calculated using a Probits method [30] and were averages of three independent determinations (SD  $\leq$  10%).

#### HDAC enzymes assay

The HDAC enzymes (Hela cell nuclear extract) were purchased from Enzo Life Sciences Inc. (Farmingdale, New York, USA). The HDAC enzymatic assay was performed using a Fluorogenic HDAC Assay Kit (Enzo Life Sciences Inc.) according to the manufacturer's instructions. Briefly, HDAC enzymes were incubated with vehicle or various concentrations of the assayed samples or SAHA for 30 min at 37°C in the presence of an HDAC fluorometric substrate. The HDAC assay developer (which produces a fluorophore in reaction mixture) was added, and the fluorescence was measured using VICTOR (PerkinElmer, Waltham, MA, USA) with excitation at 360 nm and emission at 460 nm. The measured activities were subtracted by the vehicle-treated control enzyme activities and IC<sub>50</sub> values were calculated using GraphPad Prism (GraphPad Software, San Diego, CA, USA).

#### Cell cycle analysis

SW620 human colon cancer cells ( $2 \times 10^5$ /ml per well) were seeded in 6-well culture plates and allowed to adhere for either 2 hours or 24 hours. Subsequently, the cells were treated with various concentrations of compounds for either 24 hours or 48 hours, respectively, followed by harvesting. The harvested cells underwent two washes with ice-cold PBS, were fixed in 75% ice-cold ethanol, and then stained with propidium iodide (PI) along with RNase at room temperature for 30 minutes. The stained cells were then subjected to DNA content analysis using a FACScalibur flow cytometer (BD Biosciences, San Jose, CA, USA), and the resulting data were processed utilizing Cell Quest Pro software (BD Biosciences).

#### Apoptosis assay

The Annexin V-FITC/PI dual staining assay was employed to assess the proportion of apoptotic cells. SW620 human colon cancer cells ( $2 \times 10^5$ /ml per well) were seeded in 6-well culture plates and allowed to adhere for either 2 hours or 24 hours. Subsequently, the cells were treated with varying concentrations of compounds for either 24 hours or 48 hours, respectively, followed by harvesting. The harvested cells underwent two washes with ice-cold PBS and were then incubated in the dark at room temperature in 100  $\mu$ L of 1 $\times$  binding buffer containing 1  $\mu$ L Annexin V-FITC and 12.5  $\mu$ L PI. After a 15-minute incubation period, the cells were analyzed for the percentage undergoing apoptosis using a FACScalibur flow cytometer (BD Biosciences). The resulting data were processed utilizing Cell Quest Pro software (BD Biosciences).

### 1.4. Molecular docking studies

Compound structures were generated by ChemDraw version 9.0 and subsequently subjected to minimize energy within a rms gradient of 0.1 kcal<sup>-1</sup>.mol<sup>-1</sup>.Å<sup>-1</sup> by MOE 2015 package. The force field was set to the 94s variant of the Merck Molecular force field (MMFF94s). The hydroxamic acid groups were deprotonated according to the

previous reports [31-33]. The X-ray crystallographic structure of SAHA in complex with HDAC2 and HDAC6 were taken from Protein Data Bank with ID of 4LXZ and 5EEI, respectively [34-35]. The structure was prepared using the QuickPrep tool in MOE for adding hydrogen, protonating, deleting water, and editing atom types, assigning AMBER FF99 charges according to the same procedures mentioned before [32-33]. For the docking setting, simulations of flexible-ligand rigid-protein were performed using the method of MOE Triangle matcher placement with retaining 30 poses for analysis. The results that showed appropriate binding geometry with  $Zn^{2+}$  ion was considered. The finally selected conformations were scored using London dG (Score1) and GBVI/WSA dG functions (Score2) to estimate the free binding energy between the ligands and the enzyme. All the selected poses were visualized using BIOVIA Discovery Studio v3.5 program.

## 2. All $^1\text{H}$ & $^{13}\text{C}$ NMR spectra of the compounds



# <sup>1</sup>H NMR of compound 6a

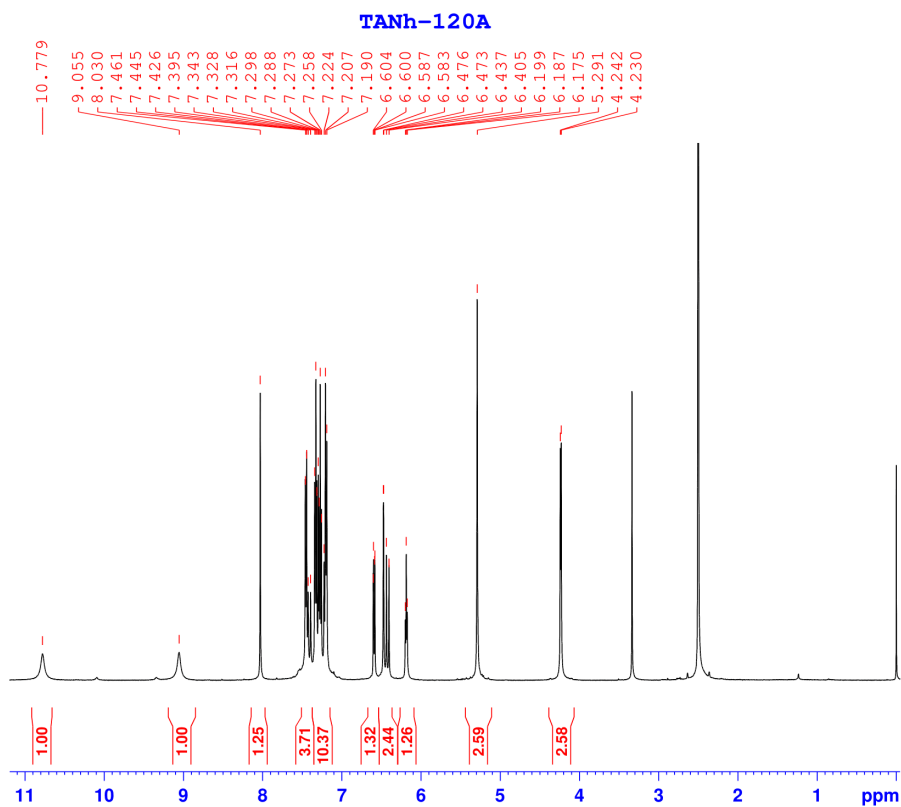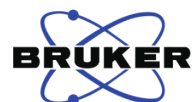

Current Data Parameters  
NAME TANh-120A  
EXPNO 20  
PROCNO 1

F2 - Acquisition Parameters  
Date\_ 20211208  
Time\_ 17.14  
INSTRUM spect  
PROBHD 5 mm PABBO BB/  
PULPROG zg30  
TD 65536  
SOLVENT DMSO  
NS 16  
DS 2  
SWH 10000.000 Hz  
FIDRES 0.152588 Hz  
AQ 3.2767999 sec  
RG 191.38  
DW 50.000 usec  
DE 6.50 usec  
TE 296.8 K  
D1 1.00000000 sec  
TD0 1

===== CHANNEL f1 =====  
SF01 500.1330885 MHz  
NUC1 1H  
P1 9.80 usec  
PLW1 24.00000000 W

F2 - Processing parameters  
SI 65536  
SF 500.1300054 MHz  
WDW EM  
SSB 0  
LB 0.30 Hz  
GB 0  
PC 1.00

# <sup>13</sup>C NMR of compound 6a

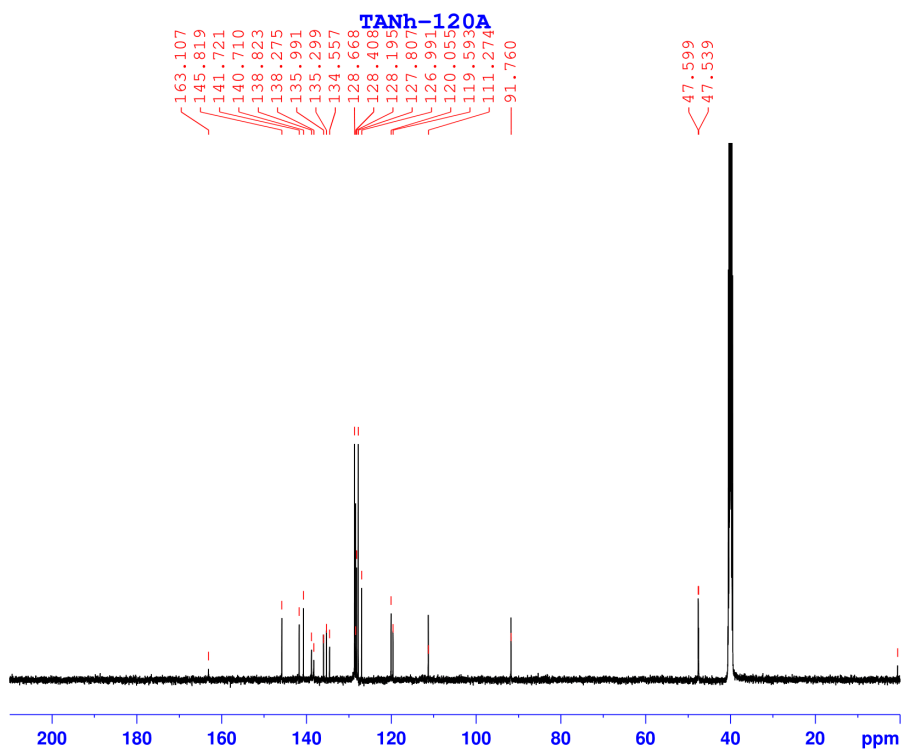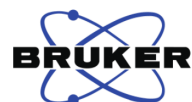

Current Data Parameters  
NAME TANh-120A  
EXPNO 21  
PROCNO 1

F2 - Acquisition Parameters  
Date\_ 20211209  
Time\_ 7.58  
INSTRUM spect  
PROBHD 5 mm PABBO BB/  
PULPROG zgpg30  
TD 65536  
SOLVENT DMSO  
NS 1992  
DS 4  
SWH 31250.000 Hz  
FIDRES 0.476837 Hz  
AQ 1.0485760 sec  
RG 191.38  
DW 16.000 usec  
DE 6.50 usec  
TE 297.5 K  
D1 2.00000000 sec  
D11 0.03000000 sec  
TD0 1

===== CHANNEL f1 =====  
SF01 125.7703637 MHz  
NUC1 13C  
P1 10.20 usec  
PLW1 90.00000000 W

===== CHANNEL f2 =====  
SF02 500.1320005 MHz  
NUC2 1H  
CPDPRG2 waltz16  
PCPD2 80.00 usec  
PLW2 24.00000000 W  
PLW12 0.36015001 W  
PLW13 0.23050000 W

F2 - Processing parameters  
SI 65536  
SF 125.7577885 MHz  
WDW EM  
SSB 0  
LB 1.00 Hz  
GB 0  
PC 1.40

### <sup>1</sup>H NMR of compound 6b

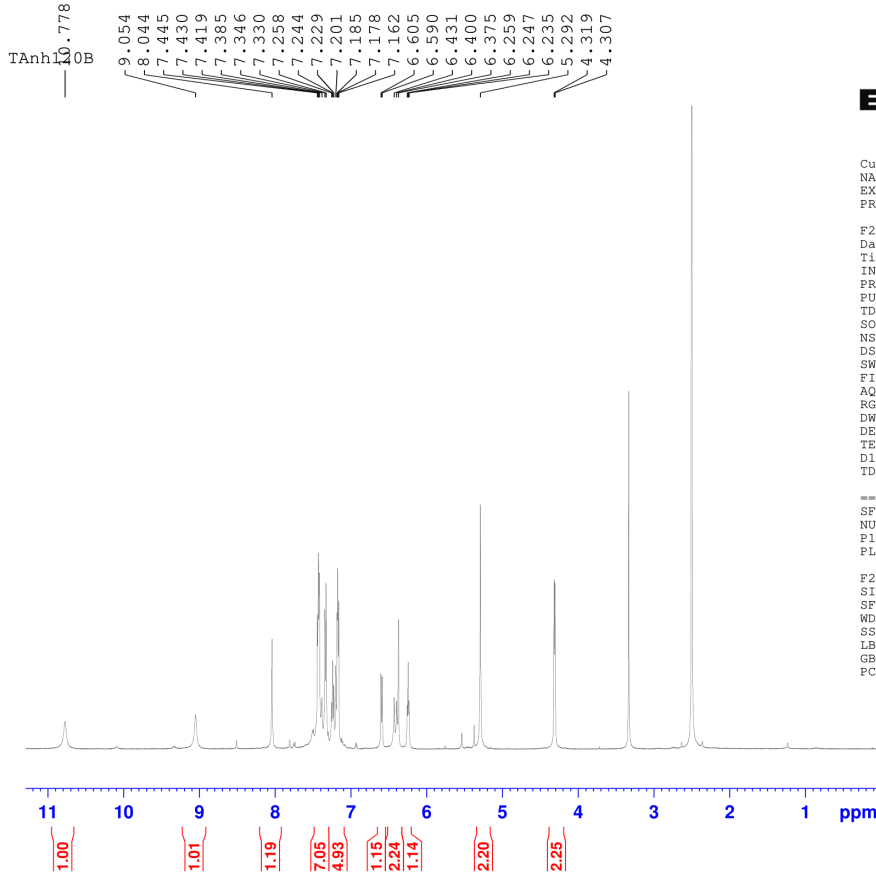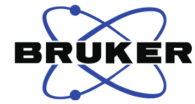

Current Data Parameters  
 NAME Tanh120B  
 EXPNO 10  
 PROCNO 1

F2 - Acquisition Parameters  
 Date\_ 20211224  
 Time 16.28  
 INSTRUM spect  
 PROBHD 5 mm PABBO BB/  
 PULPROG zg30  
 TD 65536  
 SOLVENT DMSO  
 NS 16  
 DS 2  
 SWH 10000.000 Hz  
 FIDRES 0.152588 Hz  
 AQ 3.2767999 sec  
 RG 191.38  
 DW 50.000 usec  
 DE 6.50 usec  
 TE 297.2 K  
 D1 1.0000000 sec  
 TD0 1

----- CHANNEL f1 -----  
 SFO1 500.1330885 MHz  
 NUC1 1H  
 P1 9.80 usec  
 PLW1 24.0000000 W

F2 - Processing parameters  
 SI 65536  
 SF 500.1300048 MHz  
 WDW EM  
 SSB 0  
 LB 0.30 Hz  
 GB 0  
 PC 1.00

### <sup>13</sup>C NMR of compound 6b

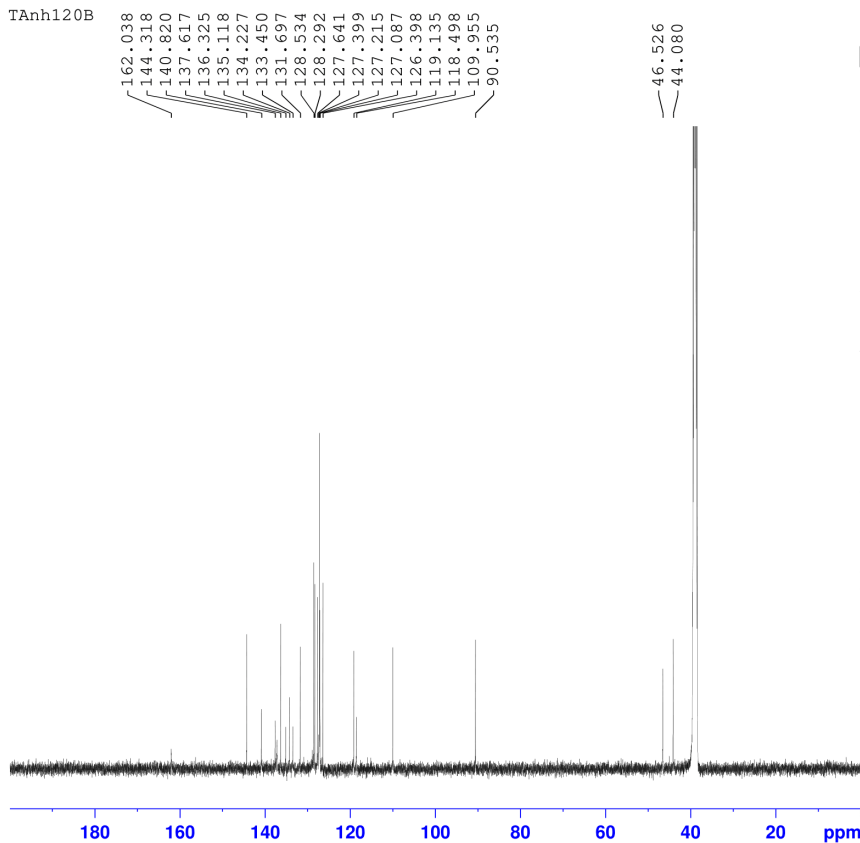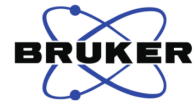

Current Data Parameters  
 NAME Tanh120B  
 EXPNO 11  
 PROCNO 1

F2 - Acquisition Parameters  
 Date\_ 20211224  
 Time 20.02  
 INSTRUM spect  
 PROBHD 5 mm PABBO BB/  
 PULPROG zgpg30  
 TD 65536  
 SOLVENT DMSO  
 NS 4096  
 DS 4  
 SWH 31250.000 Hz  
 FIDRES 0.476837 Hz  
 AQ 1.0485760 sec  
 RG 191.38  
 DW 16.000 usec  
 DE 6.50 usec  
 TE 297.9 K  
 D1 2.0000000 sec  
 D11 0.0300000 sec  
 TD0 1

----- CHANNEL f1 -----  
 SFO1 125.7703637 MHz  
 NUC1 13C  
 P1 10.20 usec  
 PLW1 90.0000000 W

----- CHANNEL f2 -----  
 SFO2 500.1320005 MHz  
 NUC2 1H  
 CPDPRG[2] waltz16  
 PCPD2 80.00 usec  
 PLW2 24.0000000 W  
 PLW12 0.36015001 W  
 PLW13 0.23050000 W

F2 - Processing parameters  
 SI 65536  
 SF 125.7579255 MHz  
 WDW EM  
 SSB 0  
 LB 1.00 Hz  
 GB 0  
 PC 1.40

**<sup>1</sup>H NMR of compound 6c**

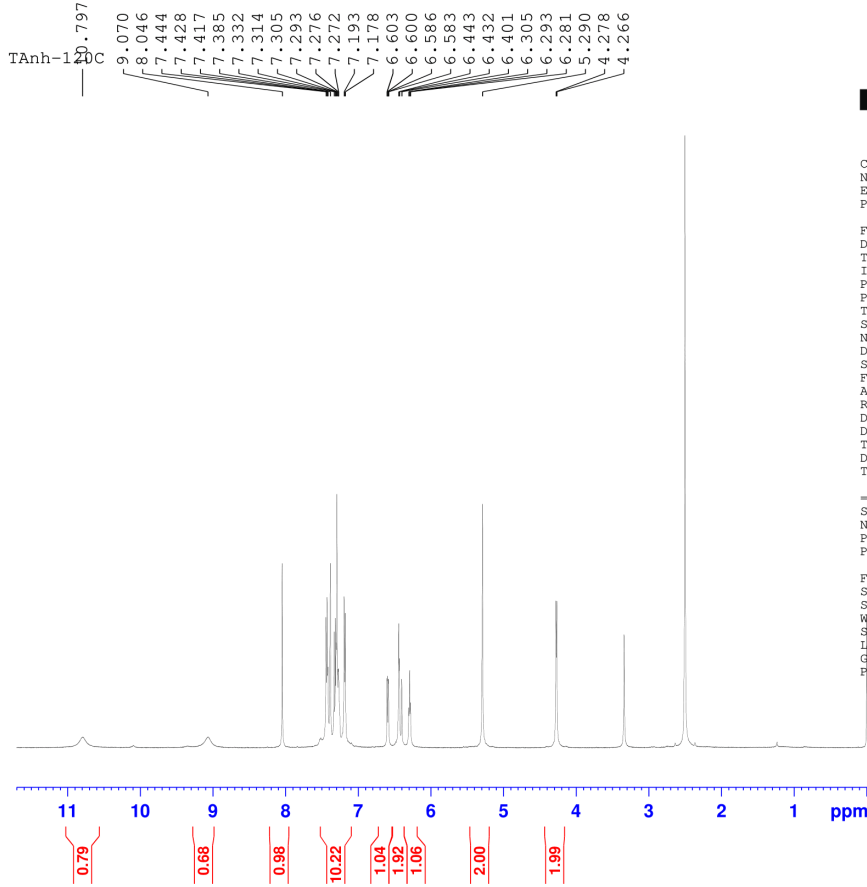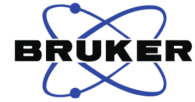

Current Data Parameters  
 NAME TAnh-120C  
 EXPNO 10  
 PROCNO 1

F2 - Acquisition Parameters  
 Date\_ 20211214  
 Time 15.11  
 INSTRUM spect  
 PROBHD 5 mm PABBO BB/  
 PULPROG zg30  
 TD 65536  
 SOLVENT DMSO  
 NS 11  
 DS 2  
 SWH 10000.000 Hz  
 FIDRES 0.152588 Hz  
 AQ 3.2767999 sec  
 RG 191.38  
 DW 50.000 usec  
 DE 6.50 usec  
 TE 297.0 K  
 D1 1.0000000 sec  
 TD0 1

----- CHANNEL f1 -----  
 SFO1 500.1330885 MHz  
 NUC1 1H  
 P1 9.80 usec  
 PLW1 24.0000000 W

F2 - Processing parameters  
 SI 65536  
 SF 500.1300050 MHz  
 WDW EM  
 SSB 0  
 LB 0.30 Hz  
 GB 0  
 HC 1.00

**<sup>13</sup>C NMR of compound 6c**

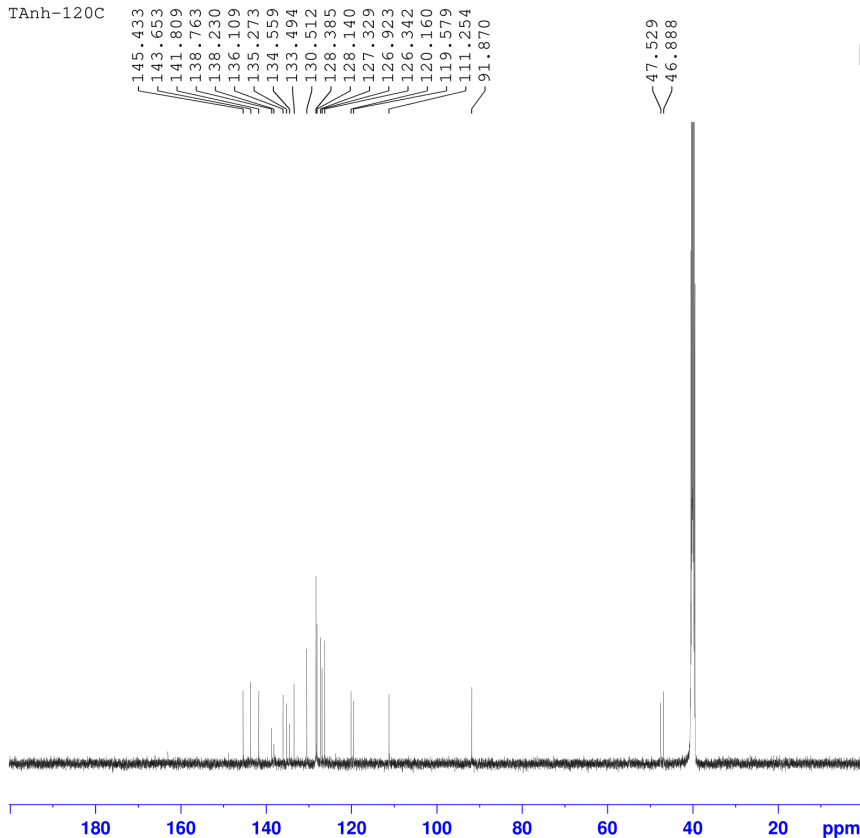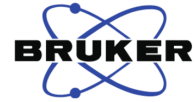

Current Data Parameters  
 NAME TAnh-120C  
 EXPNO 11  
 PROCNO 1

F2 - Acquisition Parameters  
 Date\_ 20211215  
 Time 10.02  
 INSTRUM spect  
 PROBHD 5 mm PABBO BB/  
 PULPROG zgpg30  
 TD 65536  
 SOLVENT DMSO  
 NS 1024  
 DS 4  
 SWH 31250.000 Hz  
 FIDRES 0.476837 Hz  
 AQ 1.0485760 sec  
 RG 191.38  
 DW 16.000 usec  
 DE 6.50 usec  
 TE 297.5 K  
 D1 2.0000000 sec  
 D11 0.0300000 sec  
 TD0 1

----- CHANNEL f1 -----  
 SFO1 125.7703637 MHz  
 NUC1 13C  
 P1 10.20 usec  
 PLW1 90.0000000 W

----- CHANNEL f2 -----  
 SFO2 500.1320005 MHz  
 NUC2 1H  
 CPDPRG[2] waltz16  
 PCPD2 80.00 usec  
 PLW2 24.0000000 W  
 PLW12 0.36015001 W  
 PLW13 0.23050000 W

F2 - Processing parameters  
 SI 65536  
 SF 125.7577885 MHz  
 WDW EM  
 SSB 0  
 LB 1.00 Hz  
 GB 0  
 FC 1.40

# <sup>1</sup>H NMR of compound 6d

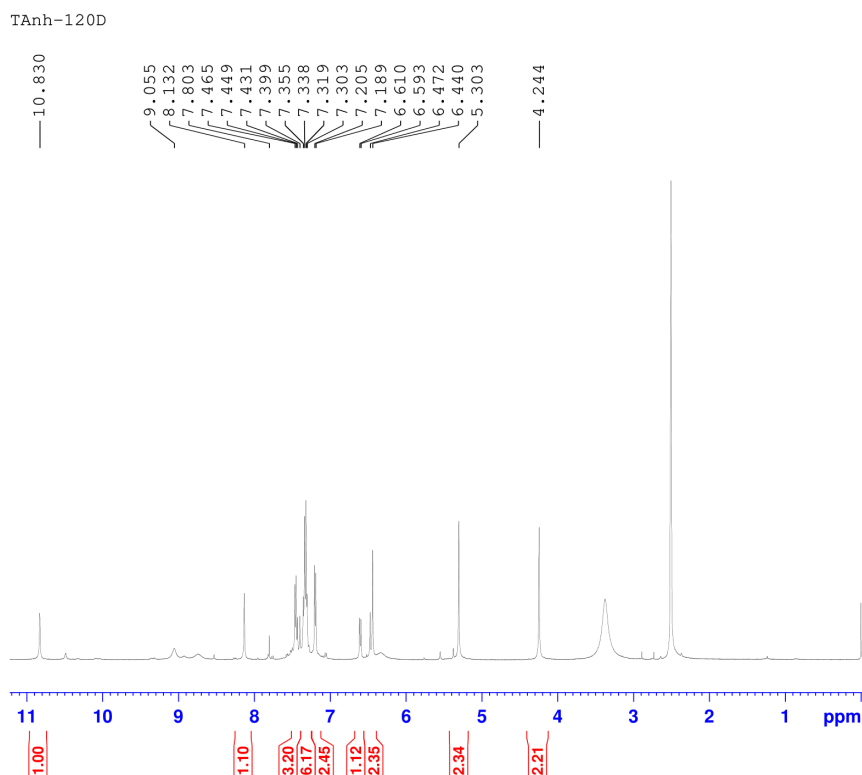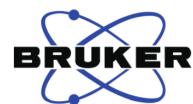

Current Data Parameters  
NAME TAnh-120D  
EXPNO 61  
PROCNO 1

F2 - Acquisition Parameters  
Date\_ 20220105  
Time 8.45  
INSTRUM spect  
PROBHD 5 mm PABBO BB/  
PULPROG zg30  
TD 65536  
SOLVENT DMSO  
NS 16  
DS 2  
SWH 10000.000 Hz  
FIDRES 0.152588 Hz  
AQ 3.2767999 sec  
RG 191.38  
DW 50.000 usec  
DE 6.50 usec  
TE 296.8 K  
D1 1.0000000 sec  
TD0 1

===== CHANNEL f1 =====  
SFO1 500.1330885 MHz  
NUC1 1H  
P1 9.80 usec  
PLW1 24.0000000 W

F2 - Processing parameters  
SI 65536  
SF 500.1300033 MHz  
WDW EM  
SSB 0  
LB 0.30 Hz  
GB 0  
PC 1.00

# <sup>13</sup>C NMR of compound 6d

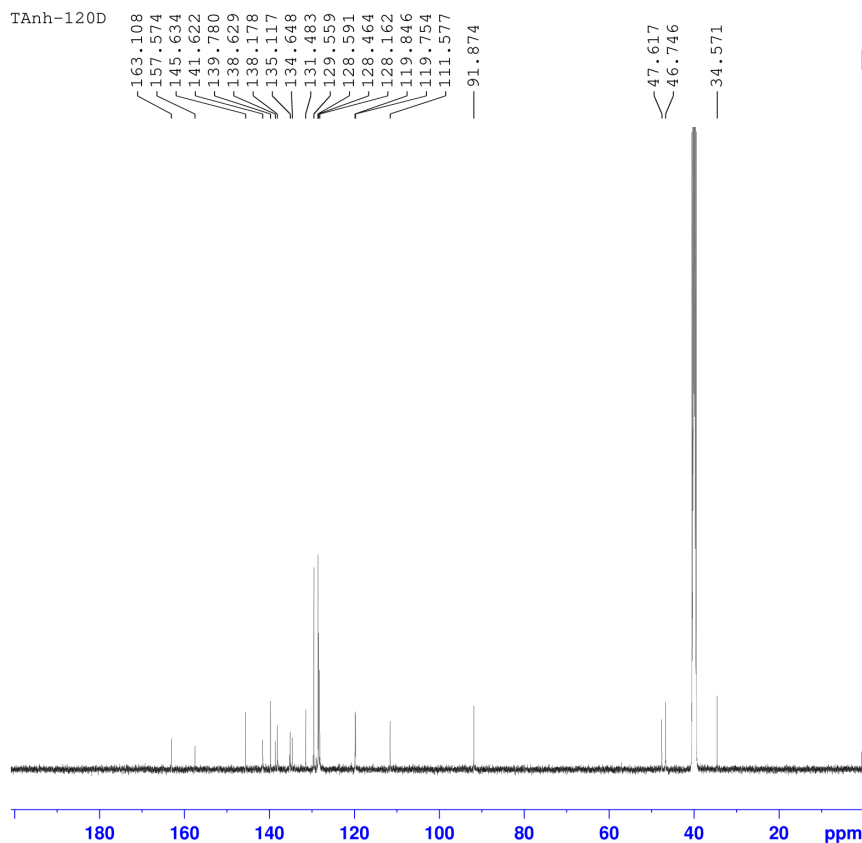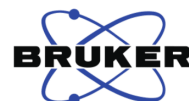

Current Data Parameters  
NAME TAnh-120D  
EXPNO 62  
PROCNO 1

F2 - Acquisition Parameters  
Date\_ 20220105  
Time 19.43  
INSTRUM spect  
PROBHD 5 mm PABBO BB/  
PULPROG zgpg30  
TD 65536  
SOLVENT DMSO  
NS 3072  
DS 4  
SWH 31250.000 Hz  
FIDRES 0.476837 Hz  
AQ 1.0485760 sec  
RG 191.38  
DW 16.000 usec  
DE 6.50 usec  
TE 298.0 K  
D1 2.0000000 sec  
D11 0.0300000 sec  
TD0 1

===== CHANNEL f1 =====  
SFO1 125.7703637 MHz  
NUC1 13C  
P1 10.20 usec  
PLW1 90.0000000 W

===== CHANNEL f2 =====  
SFO2 500.1320005 MHz  
NUC2 1H  
CPDPRG[2] waltz16  
PCPD2 80.00 usec  
PLW2 24.0000000 W  
PLW12 0.36015001 W  
PLW13 0.23050000 W

F2 - Processing parameters  
SI 65536  
SF 125.7577885 MHz  
WDW EM  
SSB 0  
LB 1.00 Hz  
GB 0  
PC 1.40

# <sup>1</sup>H NMR of compound 6c

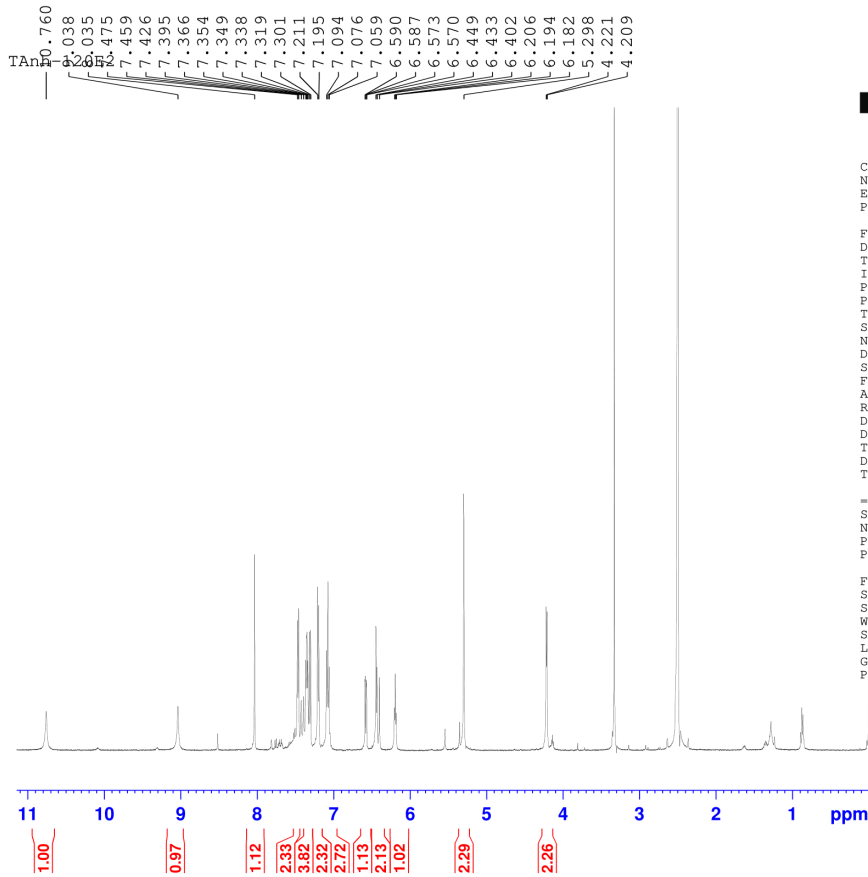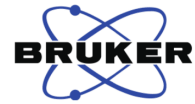

Current Data Parameters  
NAME Tanh-120E2  
EXPNO 20  
PROCNO 1

F2 - Acquisition Parameters  
Date\_ 20211222  
Time 8.36  
INSTRUM spect  
PROBHD 5 mm PABBO BB/  
PULPROG zg30  
TD 65536  
SOLVENT DMSO  
NS 16  
DS 2  
SWH 10000.000 Hz  
FIDRES 0.152588 Hz  
AQ 3.2767999 sec  
RG 191.38  
DW 50.000 usec  
DE 6.50 usec  
TE 296.8 K  
D1 1.00000000 sec  
TD0 1

----- CHANNEL f1 -----  
SFO1 500.1330885 MHz  
NUC1 1H  
P1 9.80 usec  
PLW1 24.00000000 W

F2 - Processing parameters  
SI 65536  
SF 500.1300046 MHz  
WDW EM  
SSB 0  
LB 0.30 Hz  
GB 0  
PC 1.00

# <sup>13</sup>C NMR of compound 6c

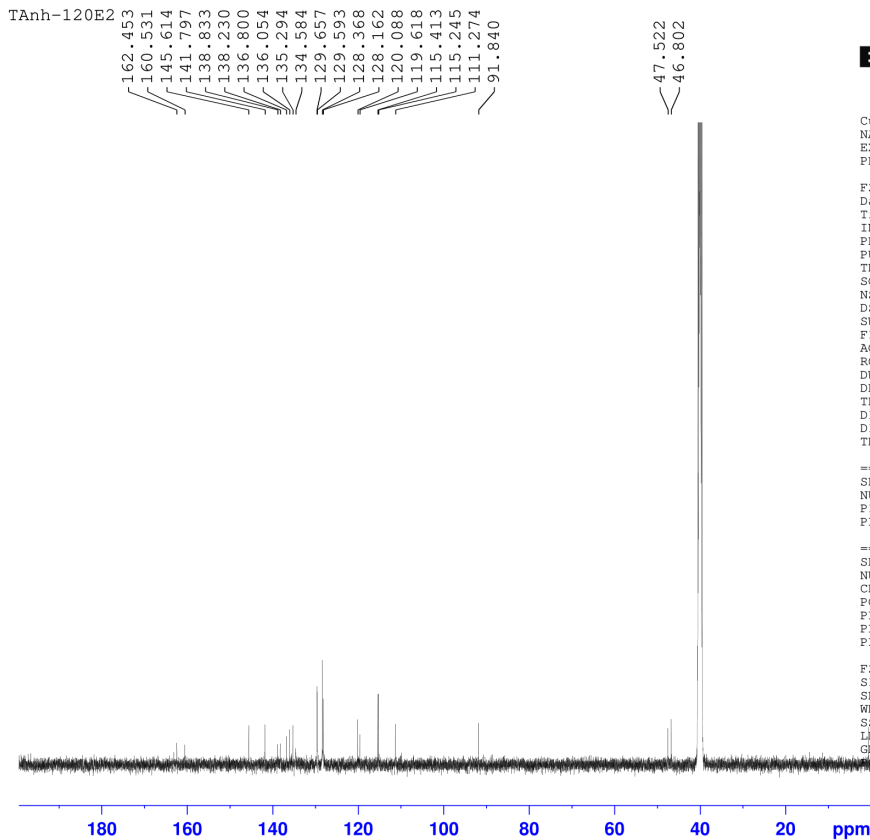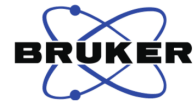

Current Data Parameters  
NAME Tanh-120E2  
EXPNO 21  
PROCNO 1

F2 - Acquisition Parameters  
Date\_ 20211222  
Time 15.01  
INSTRUM spect  
PROBHD 5 mm PABBO BB/  
PULPROG zgpg30  
TD 65536  
SOLVENT DMSO  
NS 2048  
DS 4  
SWH 31250.000 Hz  
FIDRES 0.476837 Hz  
AQ 1.0485760 sec  
RG 191.38  
DW 16.000 usec  
DE 6.50 usec  
TE 297.8 K  
D1 2.00000000 sec  
D11 0.03000000 sec  
TD0 1

----- CHANNEL f1 -----  
SFO1 125.7703637 MHz  
NUC1 13C  
P1 10.20 usec  
PLW1 90.00000000 W

----- CHANNEL f2 -----  
SFO2 500.1320005 MHz  
NUC2 1H  
CPDPRG2 waltz16  
PCPD2 80.00 usec  
PLW2 24.00000000 W  
PLW12 0.36015001 W  
PLW13 0.23050000 W

F2 - Processing parameters  
SI 65536  
SF 125.7577885 MHz  
WDW EM  
SSB 0  
LB 1.00 Hz  
GB 0  
PC 1.40

<sup>1</sup>H NMR of compound 6f

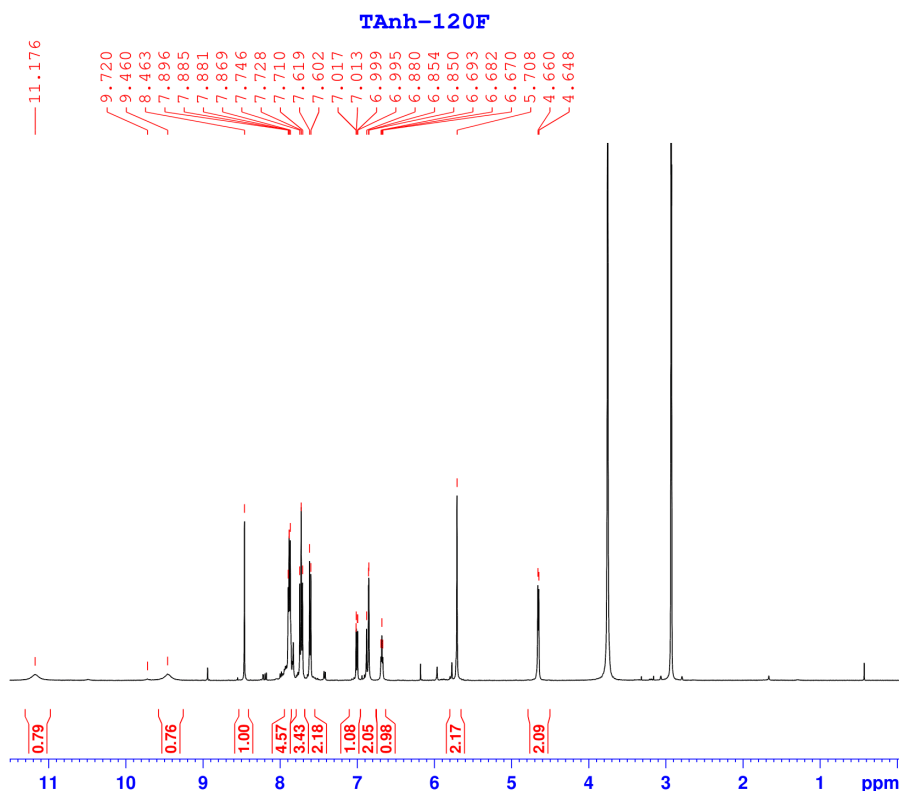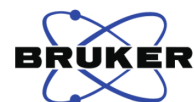

Current Data Parameters  
 NAME TAnh-120F  
 EXPNO 10  
 PROCNO 1

F2 - Acquisition Parameters  
 Date\_ 20210709  
 Time 13.30  
 INSTRUM spect  
 PROBHD 5 mm PABBO BB/  
 PULPROG zg30  
 TD 65536  
 SOLVENT DMF  
 NS 16  
 DS 2  
 SWH 10000.000 Hz  
 FIDRES 0.152588 Hz  
 AQ 3.2767999 sec  
 RG 191.38  
 DW 50.000 usec  
 DE 6.50 usec  
 TE 301.1 K  
 D1 1.00000000 sec  
 TD0 1

===== CHANNEL f1 =====  
 SF01 500.1330885 MHz  
 NUC1 1H  
 P1 9.80 usec  
 PLW1 24.00000000 W

F2 - Processing parameters  
 SI 65536  
 SF 500.1300000 MHz  
 WDW EM  
 SSB 0  
 LB 0.30 Hz  
 GB 0  
 PC 1.00

<sup>13</sup>C NMR of compound 6f

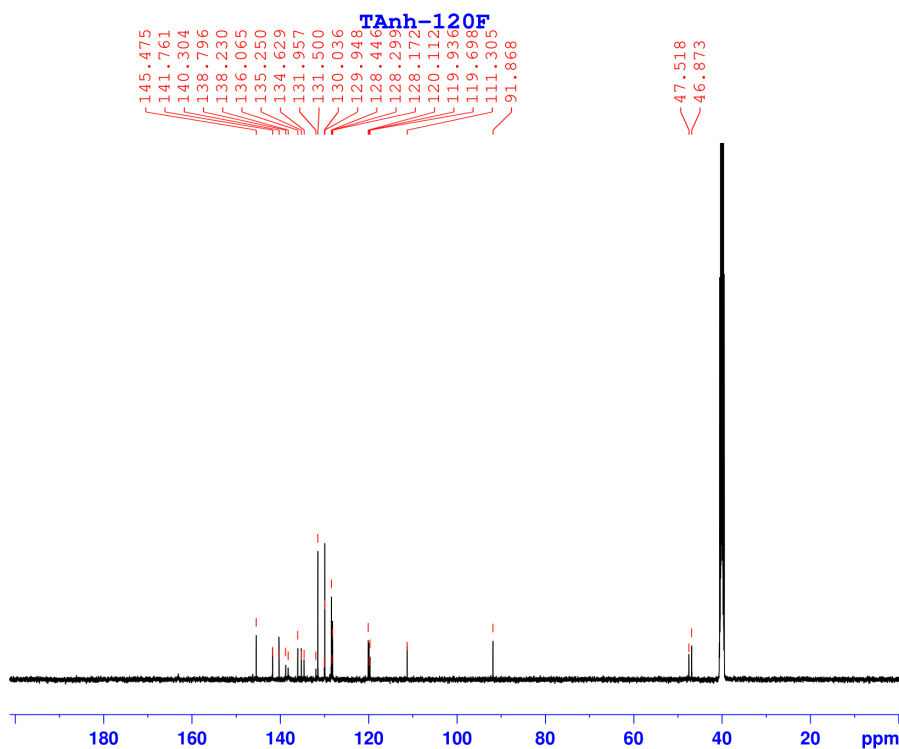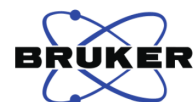

Current Data Parameters  
 NAME TAnh-120F  
 EXPNO 11  
 PROCNO 1

F2 - Acquisition Parameters  
 Date\_ 20210710  
 Time 19.24  
 INSTRUM spect  
 PROBHD 5 mm PABBO BB/  
 PULPROG zgpg30  
 TD 65536  
 SOLVENT DMSO  
 NS 3072  
 DS 4  
 SWH 31250.000 Hz  
 FIDRES 0.476837 Hz  
 AQ 1.0485760 sec  
 RG 191.38  
 DW 16.000 usec  
 DE 6.50 usec  
 TE 301.9 K  
 D1 2.00000000 sec  
 D11 0.03000000 sec  
 TD0 1

===== CHANNEL f1 =====  
 SF01 125.7703637 MHz  
 NUC1 13C  
 P1 9.50 usec  
 PLW1 90.00000000 W

===== CHANNEL f2 =====  
 SF02 500.1320005 MHz  
 NUC2 1H  
 CPDPRG2 waltz16  
 PCPD2 80.00 usec  
 PLW2 24.00000000 W  
 PLW12 0.36015001 W  
 PLW13 0.23050000 W

F2 - Processing parameters  
 SI 65536  
 SF 125.7577885 MHz  
 WDW EM  
 SSB 0  
 LB 1.00 Hz  
 GB 0  
 PC 1.40

**<sup>1</sup>H NMR of compound 6g**

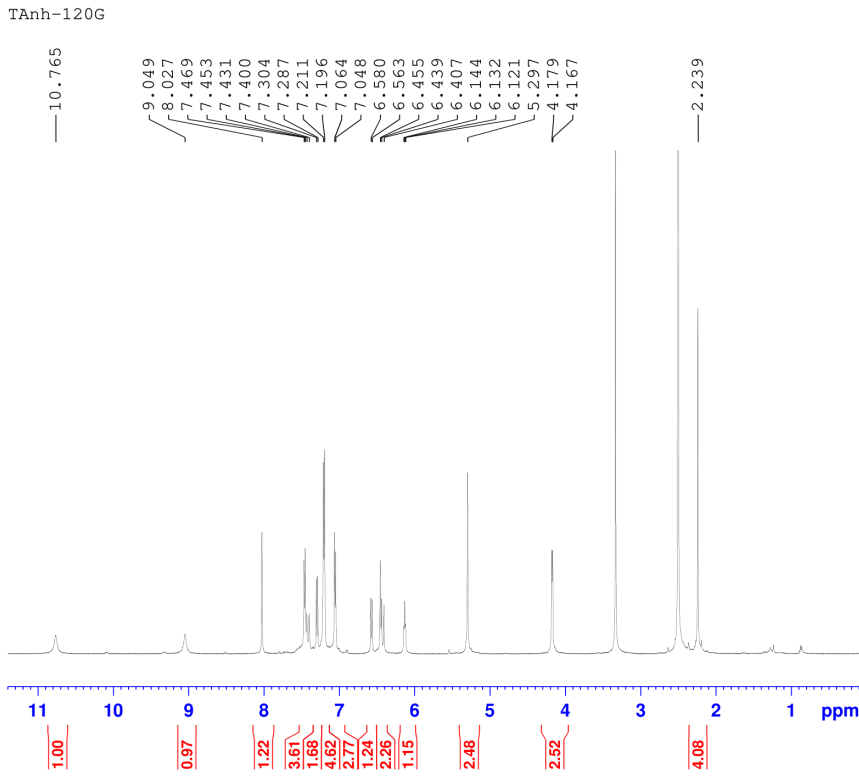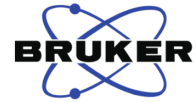

Current Data Parameters  
 NAME TAnh-120G  
 EXPNO 70  
 PROCNO 1

F2 - Acquisition Parameters  
 Date\_ 20220105  
 Time 8.38  
 INSTRUM spect  
 PROBHD 5 mm PABBO BB/  
 PULPROG zg30  
 TD 65536  
 SOLVENT DMSO  
 NS 16  
 DS 2  
 SWH 10000.000 Hz  
 FIDRES 0.152588 Hz  
 AQ 3.2767999 sec  
 RG 191.38  
 DW 50.000 usec  
 DE 6.50 usec  
 TE 296.8 K  
 D1 1.0000000 sec  
 TD0 1

===== CHANNEL f1 =====  
 SFO1 500.1330885 MHz  
 NUC1 1H  
 P1 9.80 usec  
 PLW1 24.0000000 W

F2 - Processing parameters  
 SI 65536  
 SF 500.130052 MHz  
 WDW EM  
 SSB 0  
 LB 0.30 Hz  
 GB 0  
 PC 1.00

**<sup>13</sup>C NMR of compound 6g**

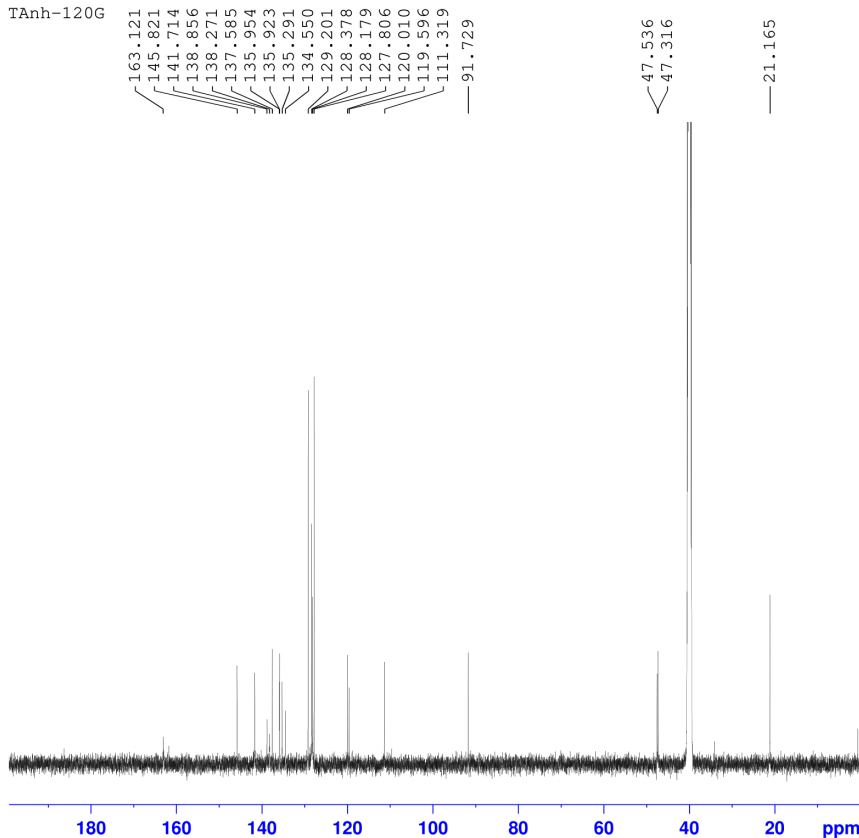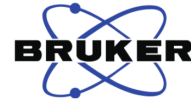

Current Data Parameters  
 NAME TAnh-120G  
 EXPNO 71  
 PROCNO 1

F2 - Acquisition Parameters  
 Date\_ 20220105  
 Time 22.25  
 INSTRUM spect  
 PROBHD 5 mm PABBO BB/  
 PULPROG zgpg30  
 TD 65536  
 SOLVENT DMSO  
 NS 3072  
 DS 4  
 SWH 31250.000 Hz  
 FIDRES 0.476837 Hz  
 AQ 1.0485760 sec  
 RG 191.38  
 DW 16.000 usec  
 DE 6.50 usec  
 TE 298.1 K  
 D1 2.0000000 sec  
 D11 0.0300000 sec  
 TD0 1

===== CHANNEL f1 =====  
 SFO1 125.7703637 MHz  
 NUC1 13C  
 P1 10.20 usec  
 PLW1 90.0000000 W

===== CHANNEL f2 =====  
 SFO2 500.1320005 MHz  
 NUC2 1H  
 CPDPRG[2] waltz16  
 PCPD2 80.00 usec  
 PLW2 24.0000000 W  
 PLW12 0.36015001 W  
 PLW13 0.23050000 W

F2 - Processing parameters  
 SI 65536  
 SF 125.7577885 MHz  
 WDW EM  
 SSB 0  
 LB 1.00 Hz  
 GB 0  
 PC 1.40

<sup>1</sup>H NMR of compound 9a

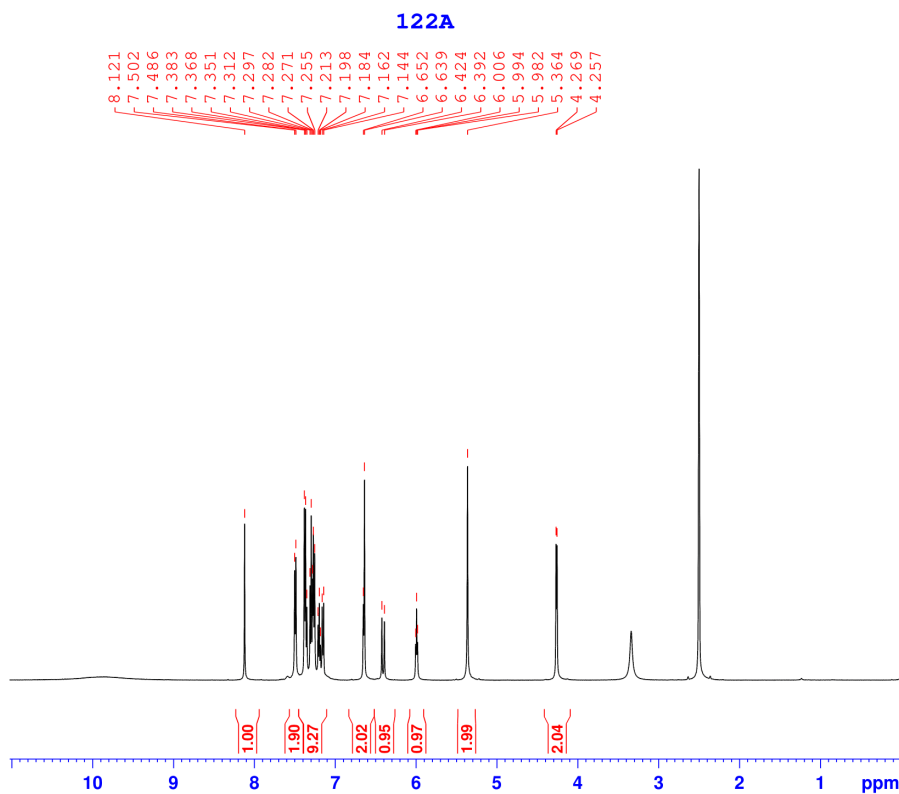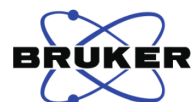

Current Data Parameters  
 NAME Tanh-122A  
 EXPNO 10  
 PROCNO 1

F2 - Acquisition Parameters  
 Date\_ 20211210  
 Time\_ 16.18  
 INSTRUM spect  
 PROBHD 5 mm PABBO BB/  
 PULPROG zg30  
 TD 65536  
 SOLVENT DMSO  
 NS 16  
 DS 2  
 SWH 10000.000 Hz  
 FIDRES 0.152588 Hz  
 AQ 3.2767999 sec  
 RG 191.38  
 DW 50.000 usec  
 DE 6.50 usec  
 TE 297.0 K  
 D1 1.00000000 sec  
 TD0 1

==== CHANNEL f1 =====  
 SF01 500.1330885 MHz  
 NUC1 1H  
 P1 9.80 usec  
 PLW1 24.00000000 W

F2 - Processing parameters  
 SI 65536  
 SF 500.1330045 MHz  
 WDW EM  
 SSB 0  
 LB 0.30 Hz  
 GB 0  
 PC 1.00

<sup>13</sup>C NMR of compound 9a

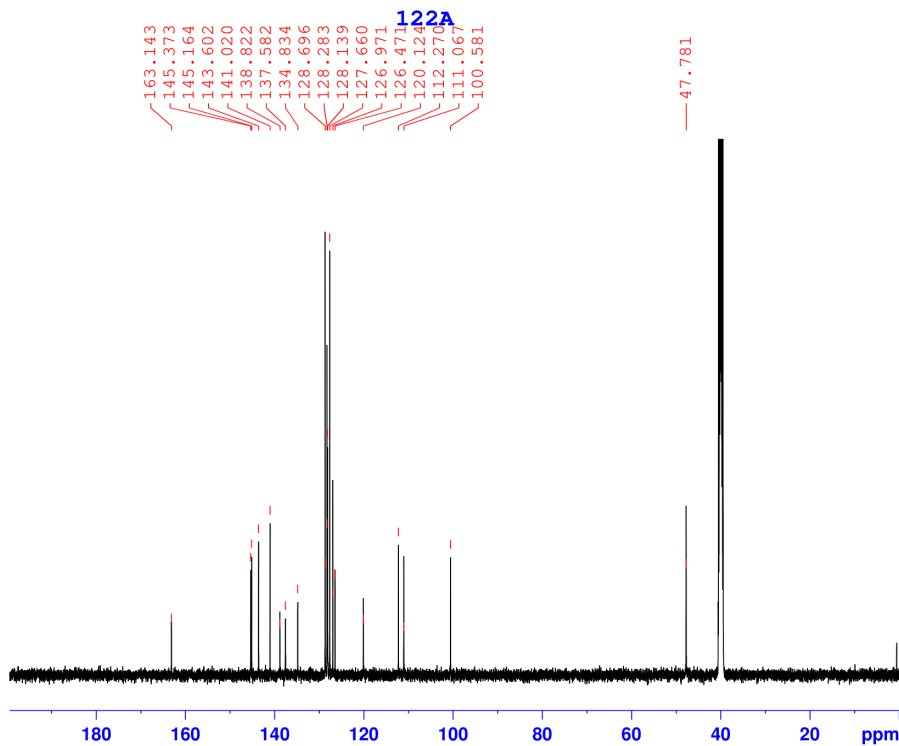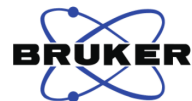

Current Data Parameters  
 NAME Tanh-122A  
 EXPNO 11  
 PROCNO 1

F2 - Acquisition Parameters  
 Date\_ 20211211  
 Time\_ 10.20  
 INSTRUM spect  
 PROBHD 5 mm PABBO BB/  
 PULPROG zgpg30  
 TD 65536  
 SOLVENT DMSO  
 NS 2048  
 DS 4  
 SWH 31250.000 Hz  
 FIDRES 0.476837 Hz  
 AQ 1.0485760 sec  
 RG 191.38  
 DW 16.000 usec  
 DE 6.50 usec  
 TE 297.5 K  
 D1 2.00000000 sec  
 D11 0.03000000 sec  
 TD0 1

==== CHANNEL f1 =====  
 SF01 125.7703637 MHz  
 NUC1 13C  
 P1 10.20 usec  
 PLW1 90.00000000 W

==== CHANNEL f2 =====  
 SFO2 500.1320005 MHz  
 NUC2 1H  
 CPDPRG2 waltz16  
 PCPD2 80.00 usec  
 PLW2 24.00000000 W  
 PLW12 0.36015001 W  
 PLW13 0.23050000 W

F2 - Processing parameters  
 SI 65536  
 SF 125.7577885 MHz  
 WDW EM  
 SSB 0  
 LB 1.00 Hz  
 GB 0  
 PC 1.40



# <sup>1</sup>H NMR of compound 9b

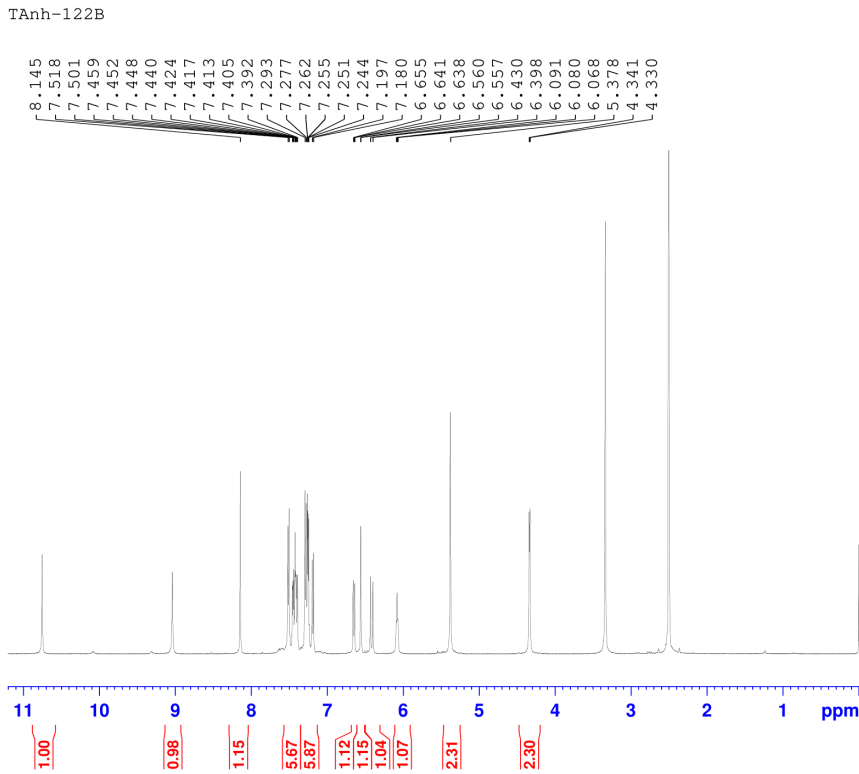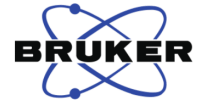

Current Data Parameters  
NAME TAnh-122B  
EXPNO 60  
PROCNO 1

F2 - Acquisition Parameters  
Date\_ 20220106  
Time 9.16  
INSTRUM spect  
PROBHD 5 mm PABBO BB/  
PULPROG zg30  
TD 65536  
SOLVENT DMSO  
NS 16  
DS 2  
SWH 10000.000 Hz  
FIDRES 0.152588 Hz  
AQ 3.2767999 sec  
RG 191.38  
DW 50.000 usec  
DE 6.50 usec  
TE 296.8 K  
D1 1.0000000 sec  
TD0 1

===== CHANNEL f1 =====  
SFO1 500.1330885 MHz  
NUC1 1H  
P1 9.80 usec  
PLW1 24.0000000 W

F2 - Processing parameters  
SI 65536  
SF 500.1300048 MHz  
WDW EM  
SSB 0  
LB 0.30 Hz  
GB 0  
PC 1.00

# <sup>13</sup>C NMR of compound 9b

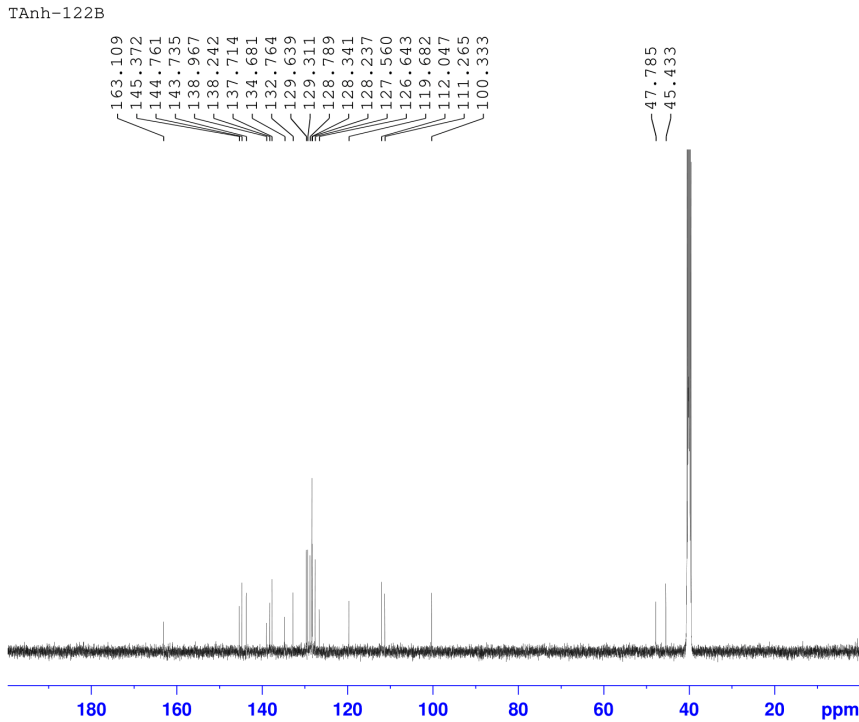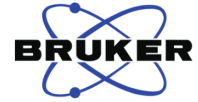

Current Data Parameters  
NAME TAnh-122B  
EXPNO 61  
PROCNO 1

F2 - Acquisition Parameters  
Date\_ 20220107  
Time 7.44  
INSTRUM spect  
PROBHD 5 mm PABBO BB/  
PULPROG zgpg30  
TD 65536  
SOLVENT DMSO  
NS 82  
DS 4  
SWH 31250.000 Hz  
FIDRES 0.476837 Hz  
AQ 1.0485760 sec  
RG 191.38  
DW 16.000 usec  
DE 6.50 usec  
TE 297.7 K  
D1 2.0000000 sec  
D11 0.0300000 sec  
TD0 1

===== CHANNEL f1 =====  
SFO1 125.7703637 MHz  
NUC1 13C  
P1 10.20 usec  
PLW1 90.0000000 W

===== CHANNEL f2 =====  
SFO2 500.1320005 MHz  
NUC2 1H  
CPDPRG2 waltz16  
PCPD2 80.00 usec  
PLW2 24.0000000 W  
PLW12 0.36015001 W  
PLW13 0.23050000 W

F2 - Processing parameters  
SI 65536  
SF 125.7577885 MHz  
WDW EM  
SSB 0  
LB 1.00 Hz  
GB 0  
PC 1.40

# <sup>1</sup>H NMR of compound 9c

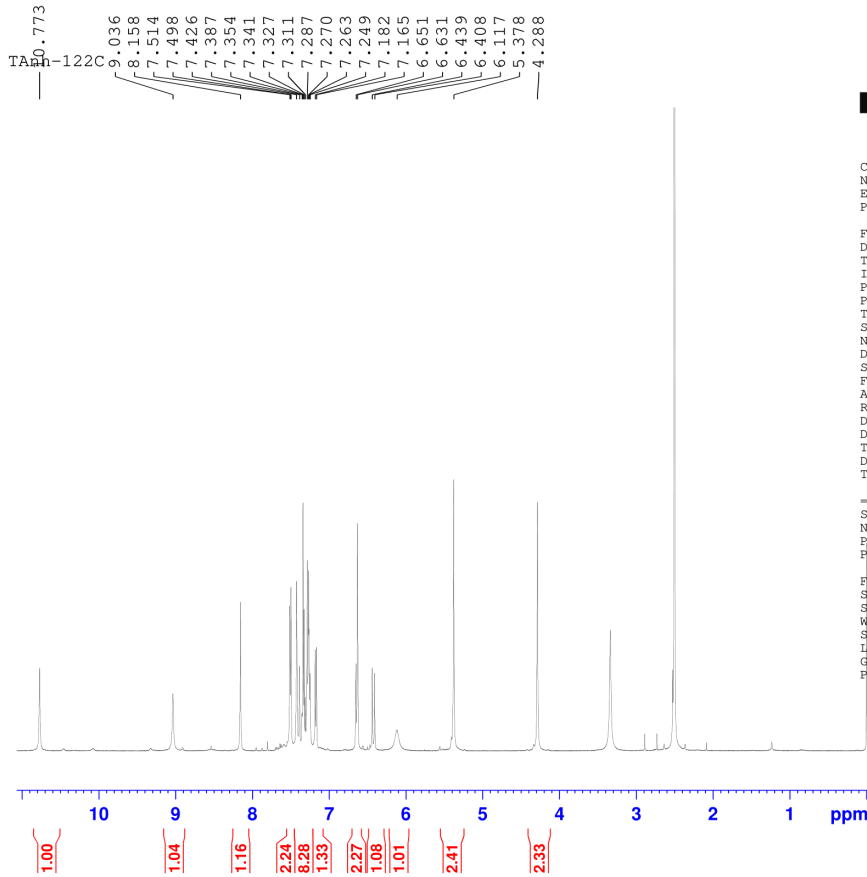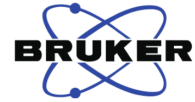

Current Data Parameters  
NAME TAnh-122C  
EXPNO 20  
PROCNO 1

F2 - Acquisition Parameters  
Date\_ 20211218  
Time 11.28  
INSTRUM spect  
PROBHD 5 mm PABBO BB/  
PULPROG zg30  
TD 65536  
SOLVENT DMSO  
NS 16  
DS 2  
SWH 10000.000 Hz  
FIDRES 0.152588 Hz  
AQ 3.2767999 sec  
RG 191.38  
DW 50.000 usec  
DE 6.50 usec  
TE 297.2 K  
D1 1.00000000 sec  
TD0 1

----- CHANNEL f1 -----  
SFO1 500.1330885 MHz  
NUC1 1H  
P1 9.80 usec  
PLW1 24.00000000 W

F2 - Processing parameters  
SI 65536  
SF 500.1300044 MHz  
WDW EM  
SSB 0  
LB 0.30 Hz  
GB 0  
HC 1.00

# <sup>13</sup>C NMR of compound 9c

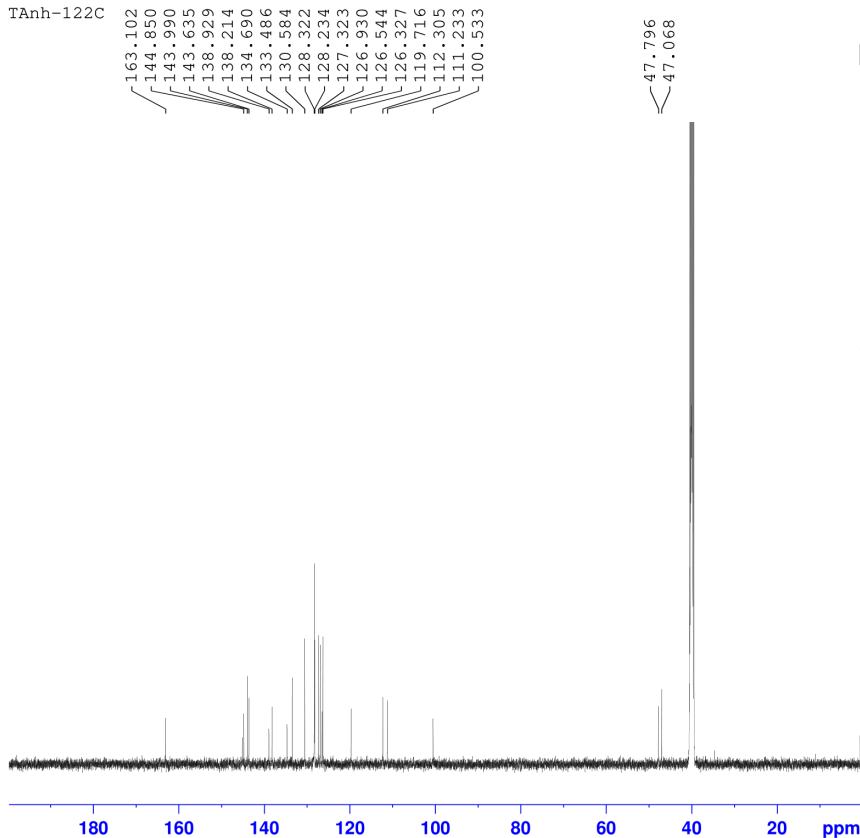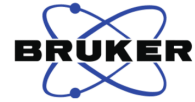

Current Data Parameters  
NAME TAnh-122C  
EXPNO 22  
PROCNO 1

F2 - Acquisition Parameters  
Date\_ 20211218  
Time 13.16  
INSTRUM spect  
PROBHD 5 mm PABBO BB/  
PULPROG zgpg30  
TD 65536  
SOLVENT DMSO  
NS 2048  
DS 4  
SWH 31250.000 Hz  
FIDRES 0.476837 Hz  
AQ 1.0485760 sec  
RG 191.38  
DW 16.000 usec  
DE 6.50 usec  
TE 297.7 K  
D1 2.00000000 sec  
D11 0.03000000 sec  
TD0 1

----- CHANNEL f1 -----  
SFO1 125.7703637 MHz  
NUC1 13C  
P1 10.20 usec  
PLW1 90.00000000 W

----- CHANNEL f2 -----  
SFO2 500.1320005 MHz  
NUC2 1H  
CPDPRG[2] waltz16  
PCPD2 80.00 usec  
PLW2 24.00000000 W  
PLW12 0.36015001 W  
PLW13 0.23050000 W

F2 - Processing parameters  
SI 65536  
SF 125.7577885 MHz  
WDW EM  
SSB 0  
LB 1.00 Hz  
GB 0  
FC 1.40

# <sup>1</sup>H NMR of compound 9d

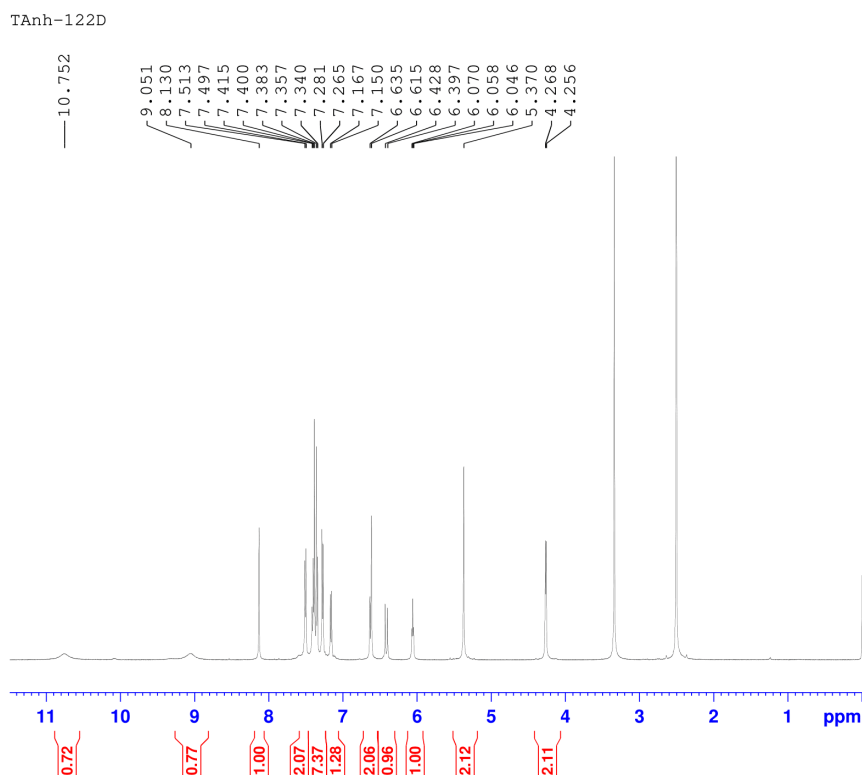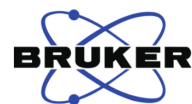

Current Data Parameters  
 NAME TAnh-122D  
 EXPNO 20  
 PROCNO 1

F2 - Acquisition Parameters  
 Date\_ 20220106  
 Time 9.01  
 INSTRUM spect  
 PROBHD 5 mm PABBO BB/  
 PULPROG zg30  
 TD 65536  
 SOLVENT DMSO  
 NS 16  
 DS 2  
 SWH 10000.000 Hz  
 FIDRES 0.152588 Hz  
 AQ 3.2767999 sec  
 RG 191.38  
 DW 50.000 usec  
 DE 6.50 usec  
 TE 297.0 K  
 D1 1.0000000 sec  
 TDO 1

===== CHANNEL f1 =====  
 SFO1 500.1330885 MHz  
 NUC1 1H  
 P1 9.80 usec  
 PLW1 24.0000000 W

F2 - Processing parameters  
 SI 65536  
 SF 500.1300048 MHz  
 WF EM  
 SSB 0  
 LB 0.30 Hz  
 GB 0  
 PC 1.00

# <sup>13</sup>C NMR of compound 9d

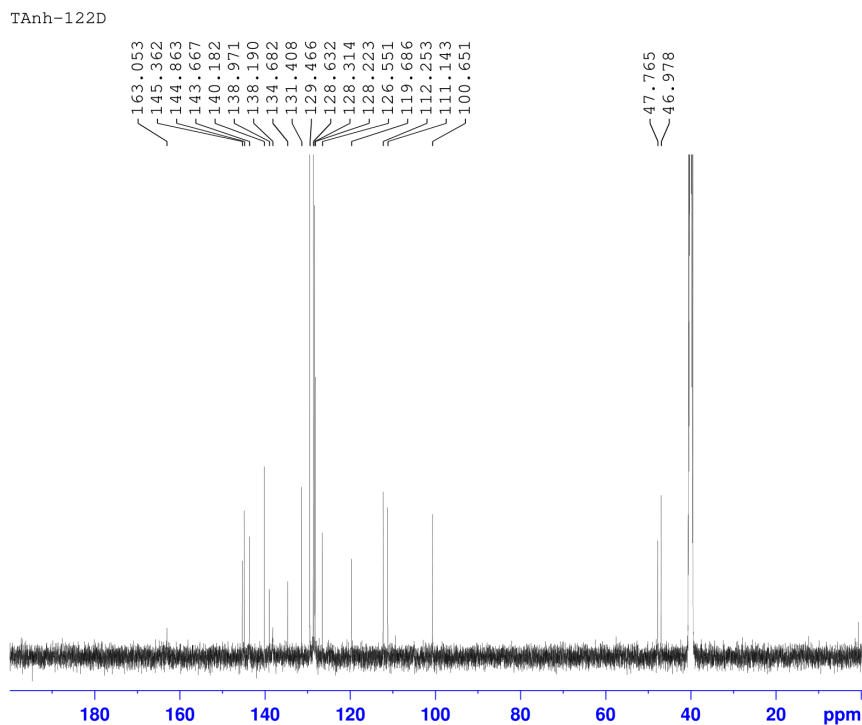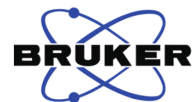

Current Data Parameters  
 NAME TAnh-122D  
 EXPNO 21  
 PROCNO 1

F2 - Acquisition Parameters  
 Date\_ 20220107  
 Time 8.52  
 INSTRUM spect  
 PROBHD 5 mm PABBO BB/  
 PULPROG zgpg30  
 TD 65536  
 SOLVENT DMSO  
 NS 1295  
 DS 4  
 SWH 31250.000 Hz  
 FIDRES 0.476837 Hz  
 AQ 1.0485760 sec  
 RG 191.38  
 DW 16.000 usec  
 DE 6.50 usec  
 TE 297.5 K  
 D1 2.0000000 sec  
 D11 0.0300000 sec  
 TDO 1

===== CHANNEL f1 =====  
 SFO1 125.7703637 MHz  
 NUC1 13C  
 P1 10.20 usec  
 PLW1 90.0000000 W

===== CHANNEL f2 =====  
 SFO2 500.1320005 MHz  
 NUC2 1H  
 CPDPRG2 waltz16  
 PCPD2 80.00 usec  
 PLW2 24.0000000 W  
 PLW12 0.36015001 W  
 PLW13 0.23050000 W

F2 - Processing parameters  
 SI 65536  
 SF 125.7577885 MHz  
 WF EM  
 SSB 0  
 LB 1.00 Hz  
 GB 0  
 PC 1.40

**<sup>1</sup>H NMR of compound 9e**

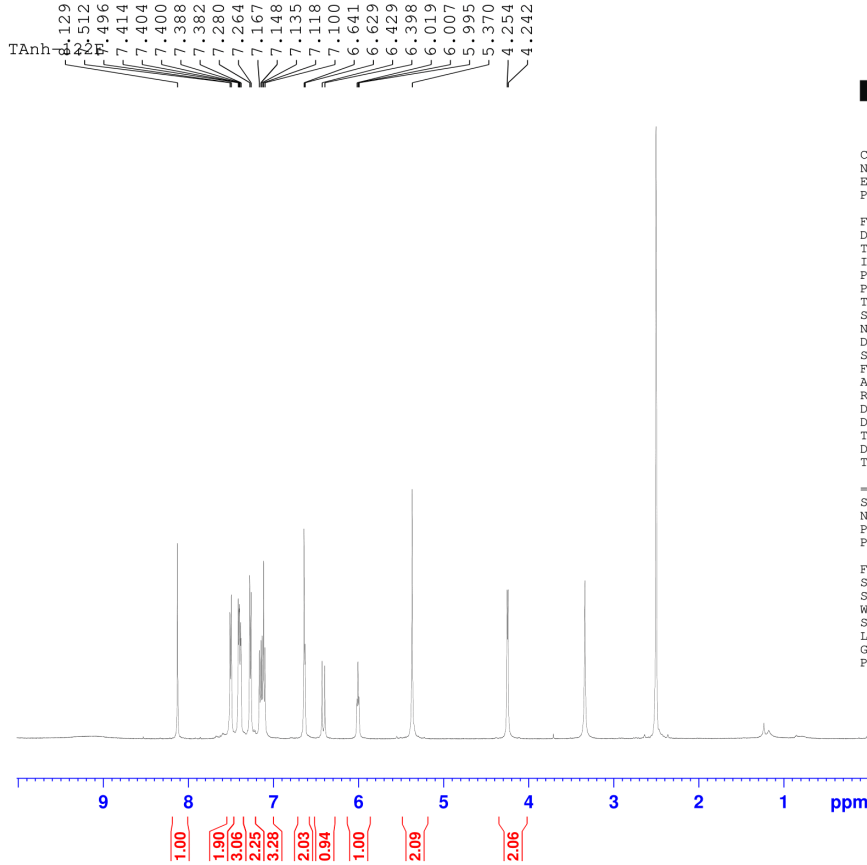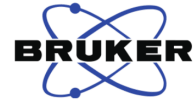

Current Data Parameters  
 NAME TAnh-122E  
 EXPNO 10  
 PROCNO 1

F2 - Acquisition Parameters  
 Date\_ 20211218  
 Time 9.37  
 INSTRUM spect  
 PROBHD 5 mm PABBO BB/  
 PULPROG zg30  
 TD 65536  
 SOLVENT DMSO  
 NS 16  
 DS 2  
 SWH 10000.000 Hz  
 FIDRES 0.152588 Hz  
 AQ 3.2767999 sec  
 RG 191.38  
 DW 50.000 usec  
 DE 6.50 usec  
 TE 297.1 K  
 D1 1.00000000 sec  
 TD0 1

===== CHANNEL f1 =====  
 SFO1 500.1330885 MHz  
 NUC1 1H  
 P1 9.80 usec  
 PLW1 24.00000000 W

F2 - Processing parameters  
 SI 65536  
 SF 500.1300051 MHz  
 WDW EM  
 SSB 0  
 LB 0.30 Hz  
 GB 0  
 PC 1.00

**<sup>13</sup>C NMR of compound 9e**

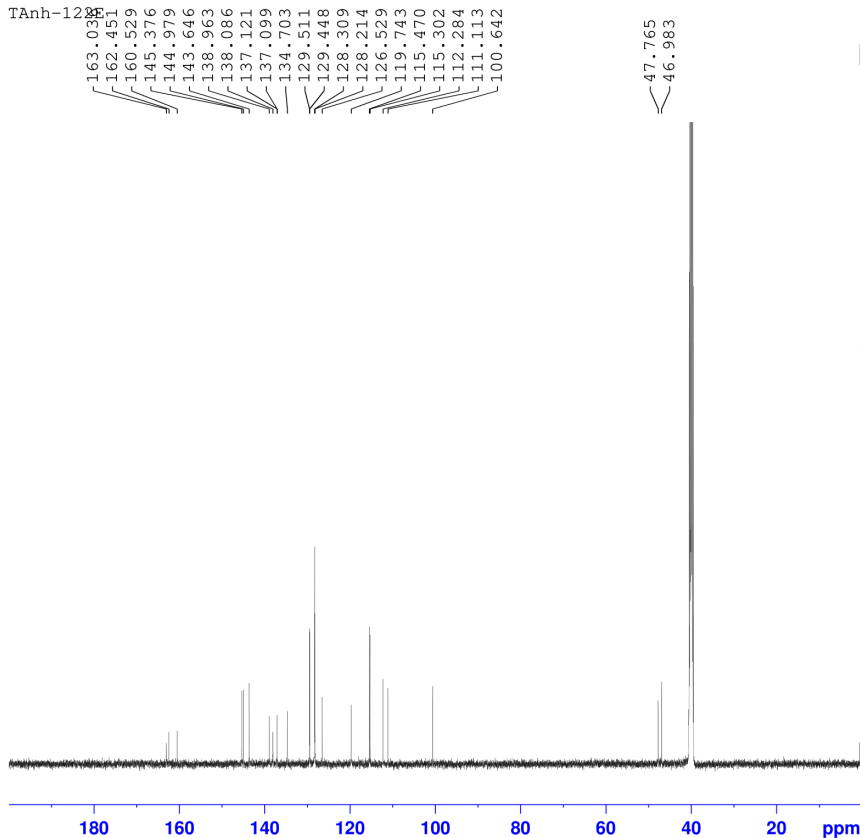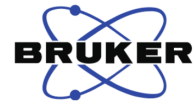

Current Data Parameters  
 NAME TAnh-122E  
 EXPNO 11  
 PROCNO 1

F2 - Acquisition Parameters  
 Date\_ 20211218  
 Time 9.39  
 INSTRUM spect  
 PROBHD 5 mm PABBO BB/  
 PULPROG zgpg30  
 TD 65536  
 SOLVENT DMSO  
 NS 2048  
 DS 4  
 SWH 31250.000 Hz  
 FIDRES 0.476837 Hz  
 AQ 1.0485760 sec  
 RG 191.38  
 DW 16.000 usec  
 DE 6.50 usec  
 TE 297.3 K  
 D1 2.00000000 sec  
 D11 0.03000000 sec  
 TD0 1

===== CHANNEL f1 =====  
 SFO1 125.7703637 MHz  
 NUC1 13C  
 P1 10.20 usec  
 PLW1 90.00000000 W

===== CHANNEL f2 =====  
 SFO2 500.1320005 MHz  
 NUC2 1H  
 CPDPRG[2] waltz16  
 PCPD2 80.00 usec  
 PLW2 24.00000000 W  
 PLW12 0.36015001 W  
 PLW13 0.23050000 W

F2 - Processing parameters  
 SI 65536  
 SF 125.7577885 MHz  
 WDW EM  
 SSB 0  
 LB 1.00 Hz  
 GB 0  
 PC 1.40

<sup>1</sup>H NMR of compound 9f

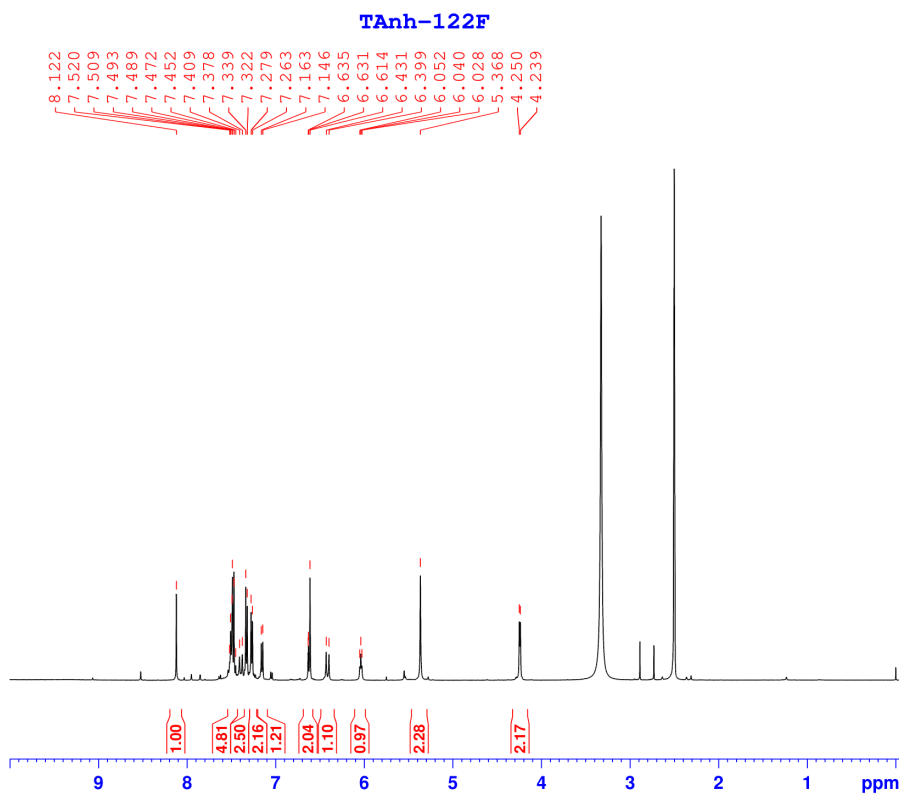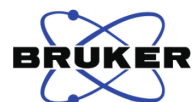

Current Data Parameters  
 NAME TAnh-122F  
 EXPNO 20  
 PROCNO 1

F2 - Acquisition Parameters  
 Date\_ 20210709  
 Time\_ 13.34  
 INSTRUM spect  
 PROBHD 5 mm PABBO BB/  
 PULPROG zg30  
 TD 65536  
 SOLVENT DMSO  
 NS 16  
 DS 2  
 SWH 10000.000 Hz  
 FIDRES 0.152588 Hz  
 AQ 3.2767999 sec  
 RG 191.38  
 DW 50.000 usec  
 DE 6.50 usec  
 TE 301.1 K  
 D1 1.00000000 sec  
 TD0 1

===== CHANNEL f1 =====  
 SF01 500.1330885 MHz  
 NUC1 1H  
 P1 9.80 usec  
 PLW1 24.00000000 W

F2 - Processing parameters  
 SI 65536  
 SF 500.1300048 MHz  
 WDW EM  
 SSB 0  
 LB 0.30 Hz  
 GB 0  
 PC 1.00

<sup>13</sup>C NMR of compound 9f

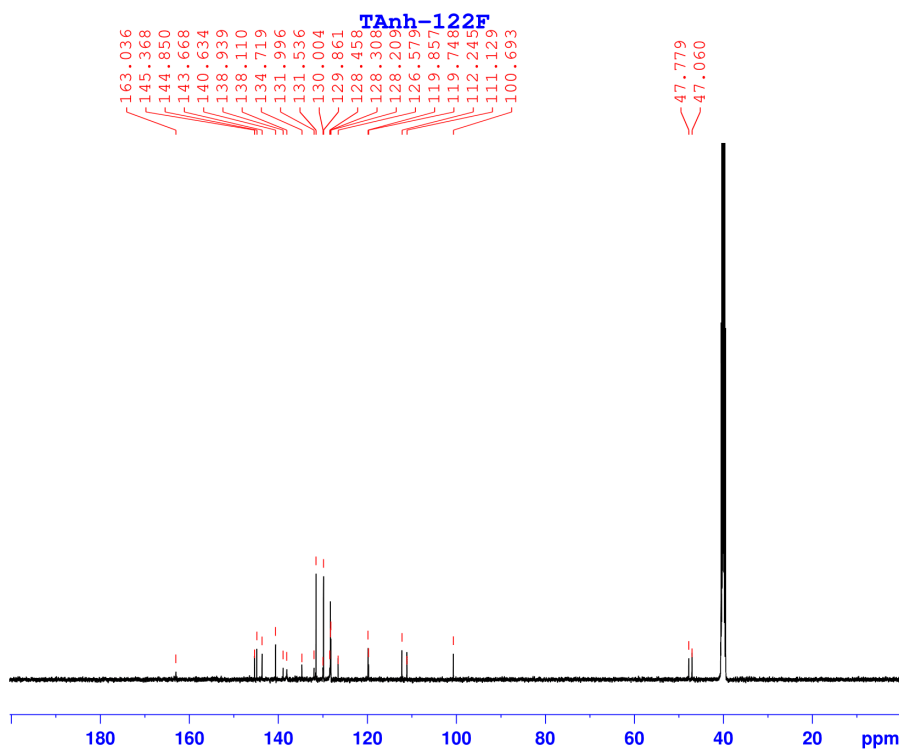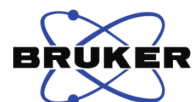

Current Data Parameters  
 NAME TAnh-122F  
 EXPNO 21  
 PROCNO 1

F2 - Acquisition Parameters  
 Date\_ 20210710  
 Time\_ 22.06  
 INSTRUM spect  
 PROBHD 5 mm PABBO BB/  
 PULPROG zgpg30  
 TD 65536  
 SOLVENT DMSO  
 NS 3072  
 DS 4  
 SWH 31250.000 Hz  
 FIDRES 0.476837 Hz  
 AQ 1.0485760 sec  
 RG 191.38  
 DW 16.000 usec  
 DE 6.50 usec  
 TE 302.0 K  
 D1 2.00000000 sec  
 D11 0.03000000 sec  
 TD0 1

===== CHANNEL f1 =====  
 SF01 125.7703637 MHz  
 NUC1 13C  
 P1 9.50 usec  
 PLW1 90.00000000 W

===== CHANNEL f2 =====  
 SFO2 500.1320005 MHz  
 NUC2 1H  
 CPDPRG2 waltz16  
 PCPD2 80.00 usec  
 PLW2 24.00000000 W  
 PLW12 0.36015001 W  
 PLW13 0.23050000 W

F2 - Processing parameters  
 SI 65536  
 SF 125.7577885 MHz  
 WDW EM  
 SSB 0  
 LB 1.00 Hz  
 GB 0  
 PC 1.40

# <sup>1</sup>H NMR of compound 9g

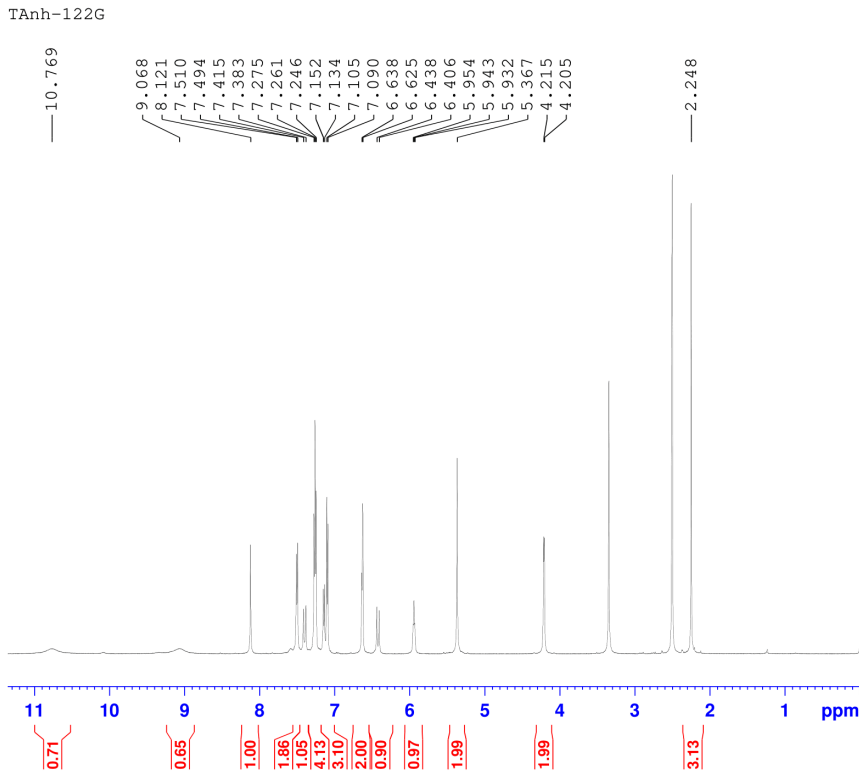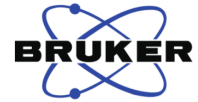

Current Data Parameters  
 NAME TAnh-122G  
 EXPNO 70  
 PROCNO 1

F2 - Acquisition Parameters  
 Date\_ 20220106  
 Time 9.19  
 INSTRUM spect  
 PROBHD 5 mm PABBO BB/  
 PULPROG zg30  
 TD 65536  
 SOLVENT DMSO  
 NS 16  
 DS 2  
 SWH 10000.000 Hz  
 FIDRES 0.152588 Hz  
 AQ 3.2767999 sec  
 RG 191.38  
 DW 50.000 usec  
 DE 6.50 usec  
 TE 296.8 K  
 D1 1.0000000 sec  
 TD0 1

===== CHANNEL f1 =====  
 SFO1 500.1330885 MHz  
 NUC1 1H  
 P1 9.80 usec  
 PLW1 24.0000000 W

F2 - Processing parameters  
 SI 65536  
 SF 500.1300052 MHz  
 WDW EM  
 SSB 0  
 LB 0.30 Hz  
 GB 0  
 PC 1.00

# <sup>13</sup>C NMR of compound 9g

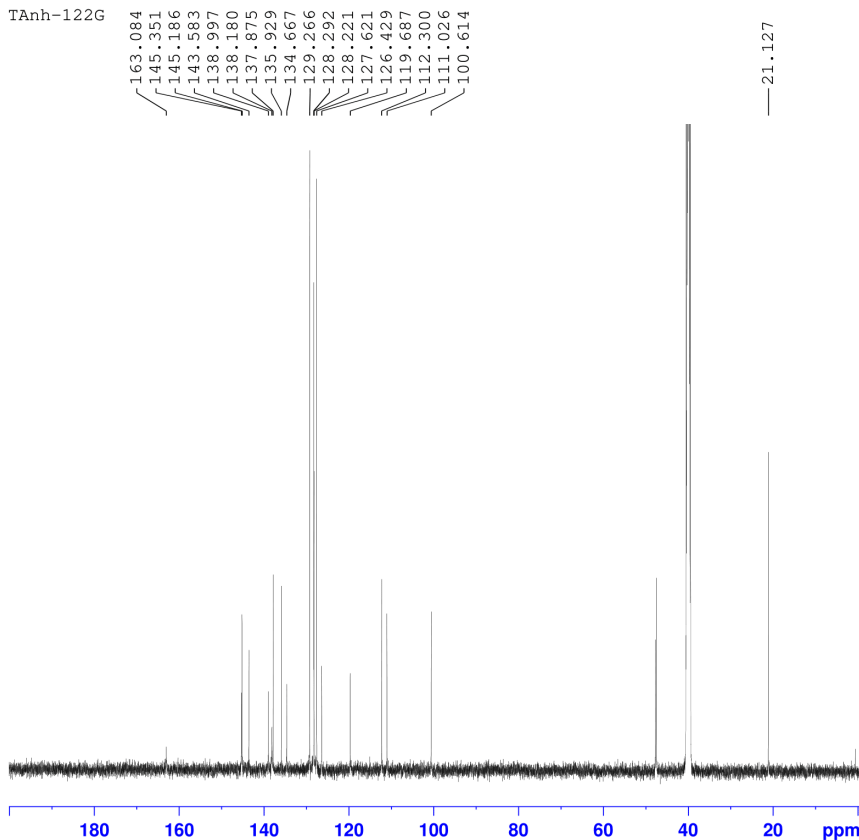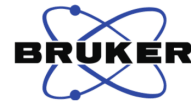

Current Data Parameters  
 NAME TAnh-122G  
 EXPNO 11  
 PROCNO 1

F2 - Acquisition Parameters  
 Date\_ 20220108  
 Time 9.52  
 INSTRUM spect  
 PROBHD 5 mm PABBO BB/  
 PULPROG zgpg30  
 TD 65536  
 SOLVENT DMSO  
 NS 3072  
 DS 4  
 SWH 31250.000 Hz  
 FIDRES 0.476837 Hz  
 AQ 1.0485760 sec  
 RG 191.38  
 DW 16.000 usec  
 DE 6.50 usec  
 TE 297.6 K  
 D1 2.0000000 sec  
 D11 0.0300000 sec  
 TD0 1

===== CHANNEL f1 =====  
 SFO1 125.7703637 MHz  
 NUC1 13C  
 P1 10.20 usec  
 PLW1 90.0000000 W

===== CHANNEL f2 =====  
 SFO2 500.1320005 MHz  
 NUC2 1H  
 CPDPRG[2] waltz16  
 PCPD2 80.00 usec  
 PLW2 24.0000000 W  
 PLW12 0.36015001 W  
 PLW13 0.23050000 W

F2 - Processing parameters  
 SI 65536  
 SF 125.7577885 MHz  
 WDW EM  
 SSB 0  
 LB 1.00 Hz  
 GB 0  
 PC 1.40

# <sup>1</sup>H NMR of compound 14a

TAnh-126A

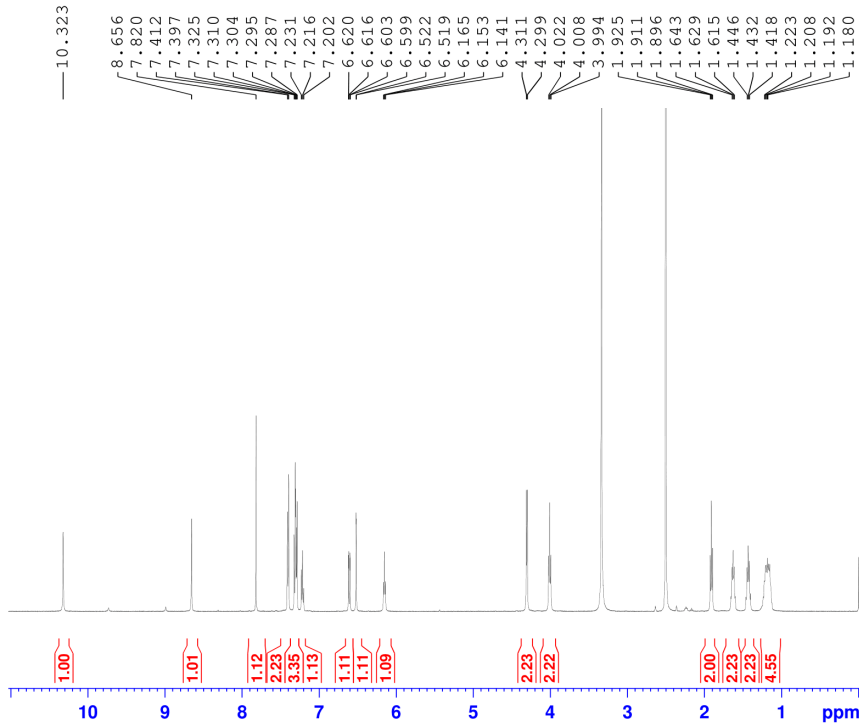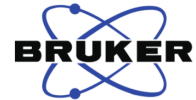

Current Data Parameters  
NAME TAnh-126A  
EXPNO 10  
PROCNO 1

F2 - Acquisition Parameters  
Date\_ 20220812  
Time 14.30  
INSTRUM spect  
PROBHD 5 mm PABBO BB/  
PULPROG zg30  
TD 65536  
SOLVENT DMSO  
NS 16  
DS 2  
SWH 10000.000 Hz  
FIDRES 0.152588 Hz  
AQ 3.2767999 sec  
RG 191.38  
DW 50.000 usec  
DE 6.50 usec  
TE 297.1 K  
D1 1.00000000 sec  
TD0 1

===== CHANNEL f1 =====  
SFO1 500.1330885 MHz  
NUC1 1H  
P1 9.80 usec  
PLW1 24.00000000 W

F2 - Processing parameters  
SI 65536  
SF 500.1300044 MHz  
WDW EM  
SSB 0  
LB 0.30 Hz  
GB 0  
PC 1.00

# <sup>13</sup>C NMR of compound 14a

TAnh-126A

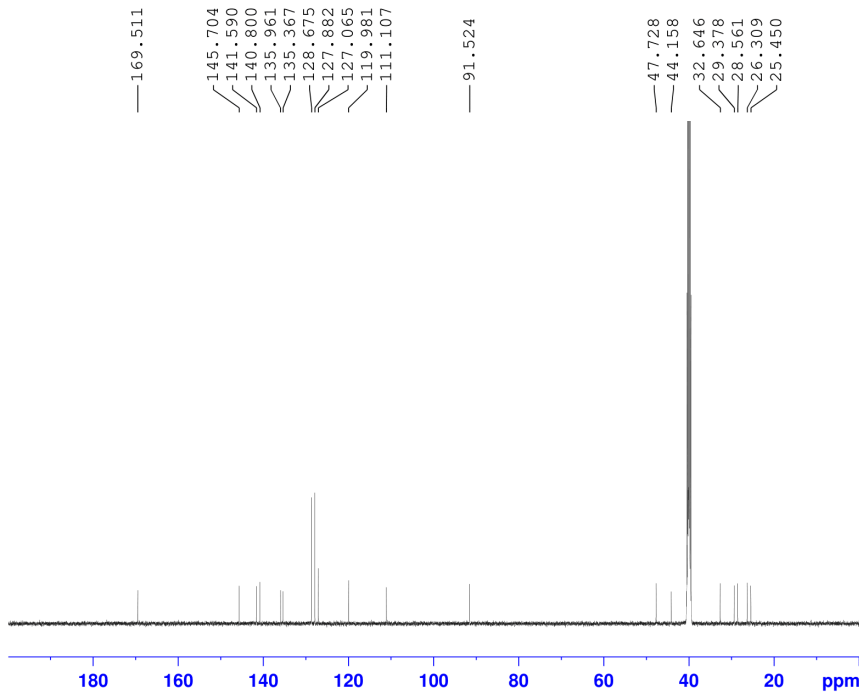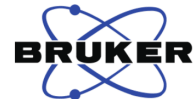

Current Data Parameters  
NAME TAnh-126A  
EXPNO 11  
PROCNO 1

F2 - Acquisition Parameters  
Date\_ 20220812  
Time 17.33  
INSTRUM spect  
PROBHD 5 mm PABBO BB/  
PULPROG zgpg30  
TD 65536  
SOLVENT DMSO  
NS 3072  
DS 4  
SWH 31250.000 Hz  
FIDRES 0.476837 Hz  
AQ 1.0485760 sec  
RG 191.38  
DW 16.000 usec  
DE 6.50 usec  
TE 298.1 K  
D1 2.00000000 sec  
D11 0.03000000 sec  
TD0 1

===== CHANNEL f1 =====  
SFO1 125.7703637 MHz  
NUC1 13C  
P1 10.20 usec  
PLW1 90.00000000 W

===== CHANNEL f2 =====  
SFO2 500.1320005 MHz  
NUC2 1H  
CPDPRG2 waltz16  
PCPD2 80.00 usec  
PLW2 24.00000000 W  
PLW12 0.36015001 W  
PLW13 0.23050000 W

F2 - Processing parameters  
SI 65536  
SF 125.7577885 MHz  
WDW EM  
SSB 0  
LB 1.00 Hz  
GB 0  
PC 1.40

# <sup>1</sup>H NMR of compound 14b

TAnh-126B

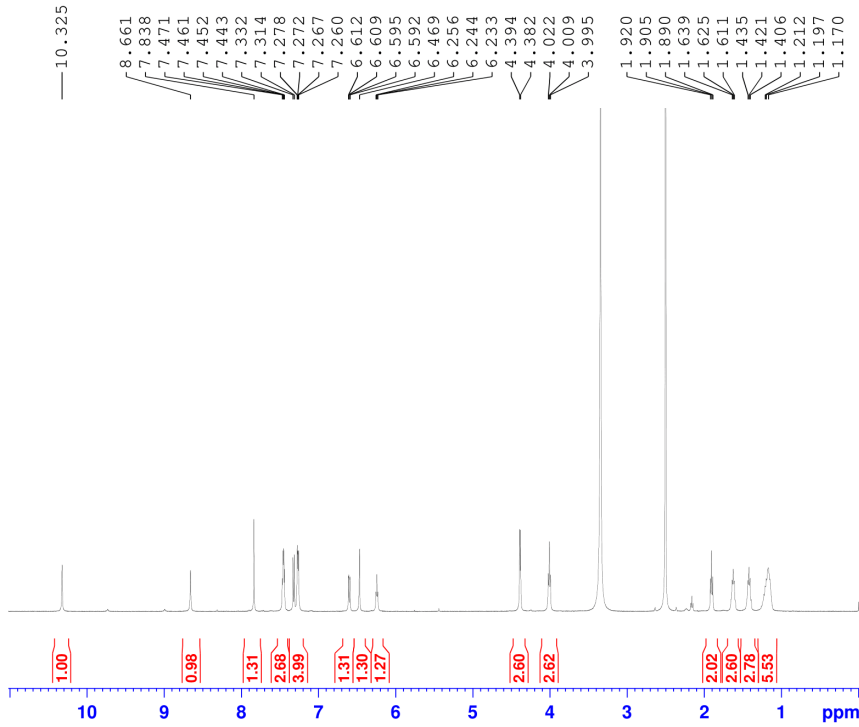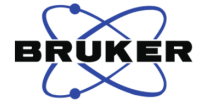

Current Data Parameters  
NAME TAnh-126B  
EXPNO 31  
PROCNO 1

F2 - Acquisition Parameters  
Date\_ 20220819  
Time 9.42  
INSTRUM spect  
PROBHD 5 mm PABBO BB/  
PULPROG zg30  
TD 65536  
SOLVENT DMSO  
NS 16  
DS 2  
SWH 10000.000 Hz  
FIDRES 0.152588 Hz  
AQ 3.2767999 sec  
RG 191.38  
DW 50.000 usec  
DE 6.50 usec  
TE 297.0 K  
D1 1.00000000 sec  
TD0 1

===== CHANNEL f1 =====  
SFO1 500.1330885 MHz  
NUC1 1H  
P1 9.80 usec  
PLW1 24.00000000 W

F2 - Processing parameters  
SI 65536  
SF 500.1300043 MHz  
WDW EM  
SSB 0  
LB 0.30 Hz  
GB 0  
PC 1.00

# <sup>13</sup>C NMR of compound 14b

TAnh-126B

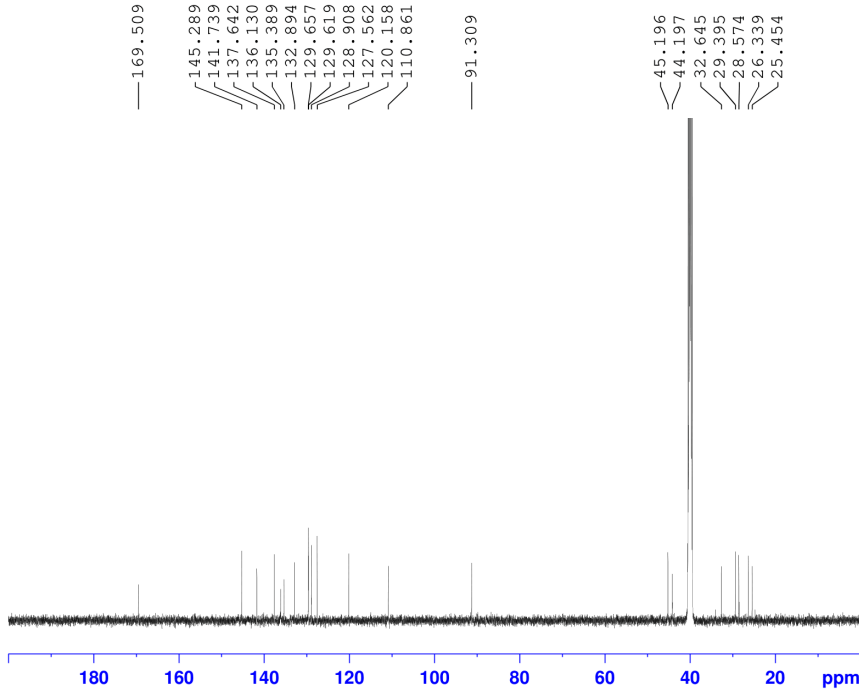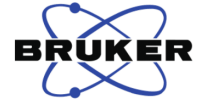

Current Data Parameters  
NAME TAnh-126B  
EXPNO 32  
PROCNO 1

F2 - Acquisition Parameters  
Date\_ 20220819  
Time 19.34  
INSTRUM spect  
PROBHD 5 mm PABBO BB/  
PULPROG zgpg30  
TD 65536  
SOLVENT DMSO  
NS 3072  
DS 4  
SWH 31250.000 Hz  
FIDRES 0.476837 Hz  
AQ 1.0485760 sec  
RG 191.38  
DW 16.000 usec  
DE 6.50 usec  
TE 298.7 K  
D1 2.00000000 sec  
D11 0.03000000 sec  
TD0 1

===== CHANNEL f1 =====  
SFO1 125.7703637 MHz  
NUC1 13C  
P1 10.20 usec  
PLW1 90.00000000 W

===== CHANNEL f2 =====  
SFO2 500.1320005 MHz  
NUC2 1H  
CPDPRG2 waltz16  
PCPD2 80.00 usec  
PLW2 24.00000000 W  
PLW12 0.36015001 W  
PLW13 0.23050000 W

F2 - Processing parameters  
SI 65536  
SF 125.7577885 MHz  
WDW EM  
SSB 0  
LB 1.00 Hz  
GB 0  
PC 1.40



# <sup>1</sup>H NMR of compound 14c

TAnh-126C

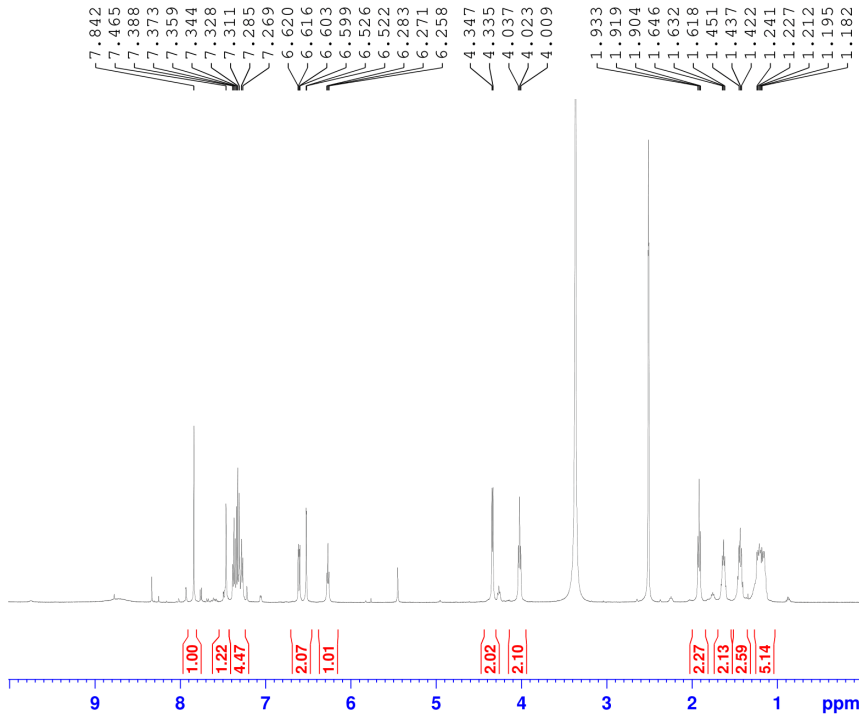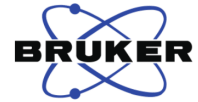

Current Data Parameters  
NAME TAnh-126C  
EXPNO 20  
PROCNO 1

F2 - Acquisition Parameters  
Date\_ 20220922  
Time 9.24  
INSTRUM spect  
PROBHD 5 mm PABBO BB/  
PULPROG zg30  
TD 65536  
SOLVENT DMSO  
NS 16  
DS 2  
SWH 10000.000 Hz  
FIDRES 0.152588 Hz  
AQ 3.2767999 sec  
RG 191.38  
DW 50.000 usec  
DE 6.50 usec  
TE 296.7 K  
D1 1.00000000 sec  
TD0 1

===== CHANNEL f1 =====  
SFO1 500.1330885 MHz  
NUC1 1H  
P1 9.80 usec  
PLW1 24.00000000 W

F2 - Processing parameters  
SI 65536  
SF 500.1300000 MHz  
WDW EM  
SSB 0  
LB 0.30 Hz  
GB 0  
PC 1.00

# <sup>13</sup>C NMR of compound 14c

TAnh-126C

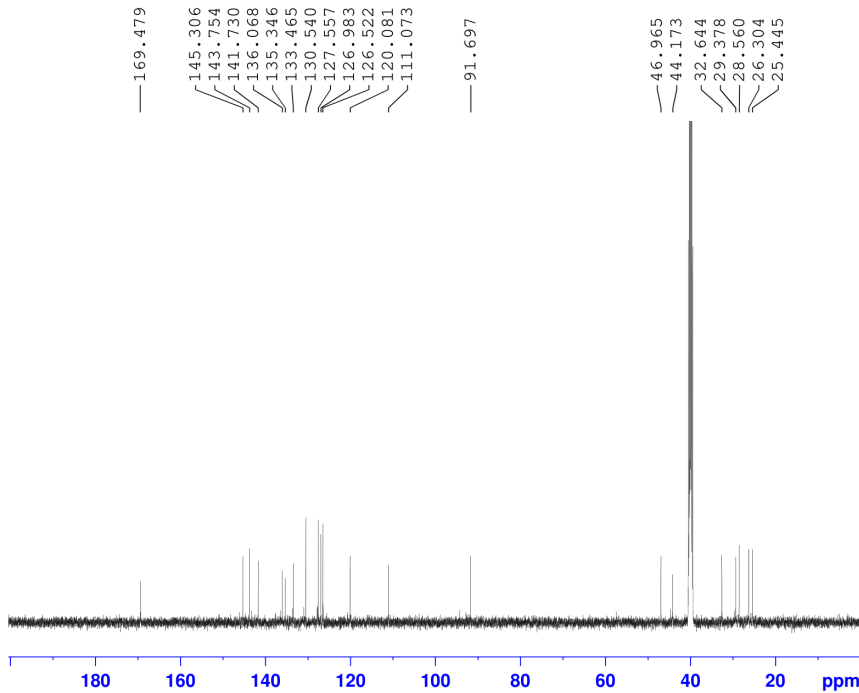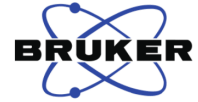

Current Data Parameters  
NAME TAnh-126C  
EXPNO 21  
PROCNO 1

F2 - Acquisition Parameters  
Date\_ 20220922  
Time 10.27  
INSTRUM spect  
PROBHD 5 mm PABBO BB/  
PULPROG zgpg30  
TD 65536  
SOLVENT DMSO  
NS 540  
DS 4  
SWH 31250.000 Hz  
FIDRES 0.476837 Hz  
AQ 1.0485760 sec  
RG 191.38  
DW 16.000 usec  
DE 6.50 usec  
TE 297.4 K  
D1 2.00000000 sec  
D11 0.03000000 sec  
TD0 1

===== CHANNEL f1 =====  
SFO1 125.7703637 MHz  
NUC1 13C  
P1 10.20 usec  
PLW1 90.00000000 W

===== CHANNEL f2 =====  
SFO2 500.1320005 MHz  
NUC2 1H  
CPDPRG2 waltz16  
PCPD2 80.00 usec  
PLW2 24.00000000 W  
PLW12 0.36015001 W  
PLW13 0.23050000 W

F2 - Processing parameters  
SI 65536  
SF 125.7577885 MHz  
WDW EM  
SSB 0  
LB 1.00 Hz  
GB 0  
PC 1.40

# <sup>1</sup>H NMR of compound 14d

TAnh-126D

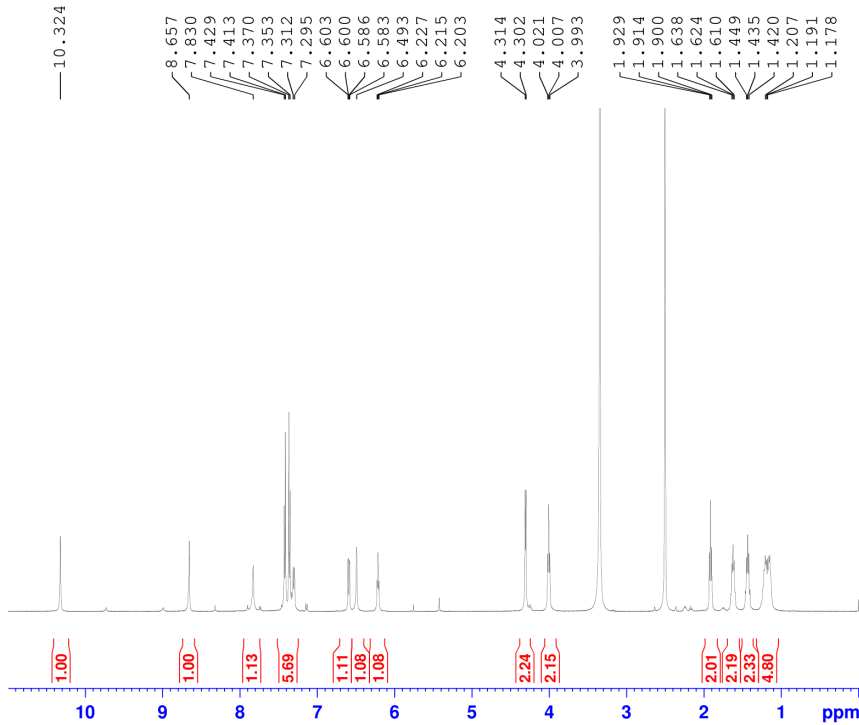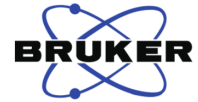

Current Data Parameters  
NAME TAnh-126D  
EXPNO 20  
PROCNO 1

F2 - Acquisition Parameters  
Date\_ 20220819  
Time 9.38  
INSTRUM spect  
PROBHD 5 mm PABBO BB/  
PULPROG zg30  
TD 65536  
SOLVENT DMSO  
NS 16  
DS 2  
SWH 10000.000 Hz  
FIDRES 0.152588 Hz  
AQ 3.2767999 sec  
RG 191.38  
DW 50.000 usec  
DE 6.50 usec  
TE 297.1 K  
D1 1.00000000 sec  
TD0 1

===== CHANNEL f1 =====  
SFO1 500.1330885 MHz  
NUC1 1H  
P1 9.80 usec  
PLW1 24.00000000 W

F2 - Processing parameters  
SI 65536  
SF 500.1300042 MHz  
WDW EM  
SSB 0  
LB 0.30 Hz  
GB 0  
PC 1.00

# <sup>13</sup>C NMR of compound 14d

TAnh-126D

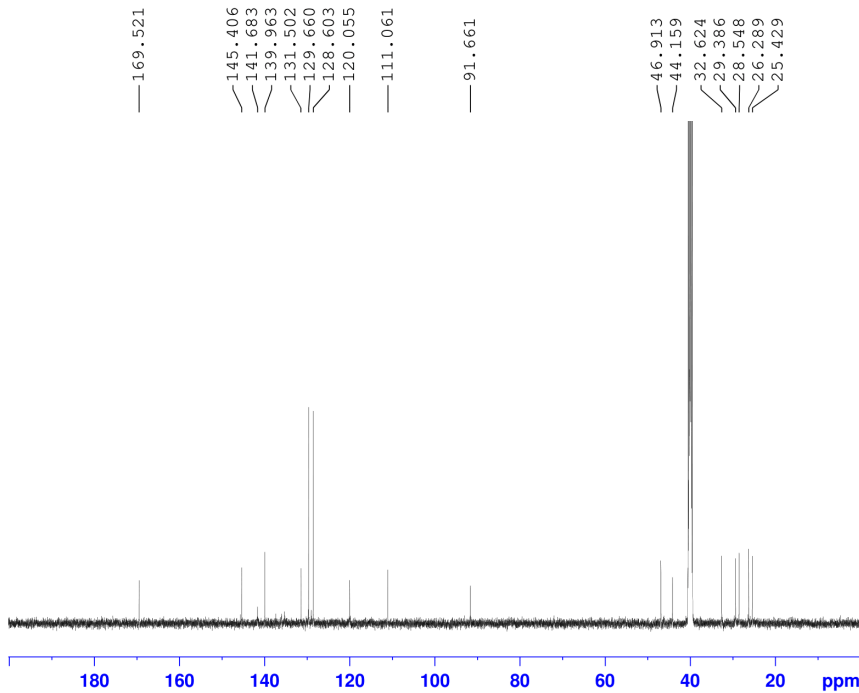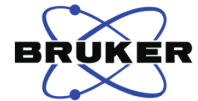

Current Data Parameters  
NAME TAnh-126D  
EXPNO 21  
PROCNO 1

F2 - Acquisition Parameters  
Date\_ 20220819  
Time 13.30  
INSTRUM spect  
PROBHD 5 mm PABBO BB/  
PULPROG zgpg30  
TD 65536  
SOLVENT DMSO  
NS 2048  
DS 4  
SWH 31250.000 Hz  
FIDRES 0.476837 Hz  
AQ 1.0485760 sec  
RG 191.38  
DW 16.000 usec  
DE 6.50 usec  
TE 298.2 K  
D1 2.00000000 sec  
D11 0.03000000 sec  
TD0 1

===== CHANNEL f1 =====  
SFO1 125.7703637 MHz  
NUC1 13C  
P1 10.20 usec  
PLW1 90.00000000 W

===== CHANNEL f2 =====  
SFO2 500.1320005 MHz  
NUC2 1H  
CPDPRG2 waltz16  
PCPD2 80.00 usec  
PLW2 24.00000000 W  
PLW12 0.36015001 W  
PLW13 0.23050000 W

F2 - Processing parameters  
SI 65536  
SF 125.7577885 MHz  
WDW EM  
SSB 0  
LB 1.00 Hz  
GB 0  
PC 1.40

# <sup>1</sup>H NMR of compound 14e

TAnh-126E

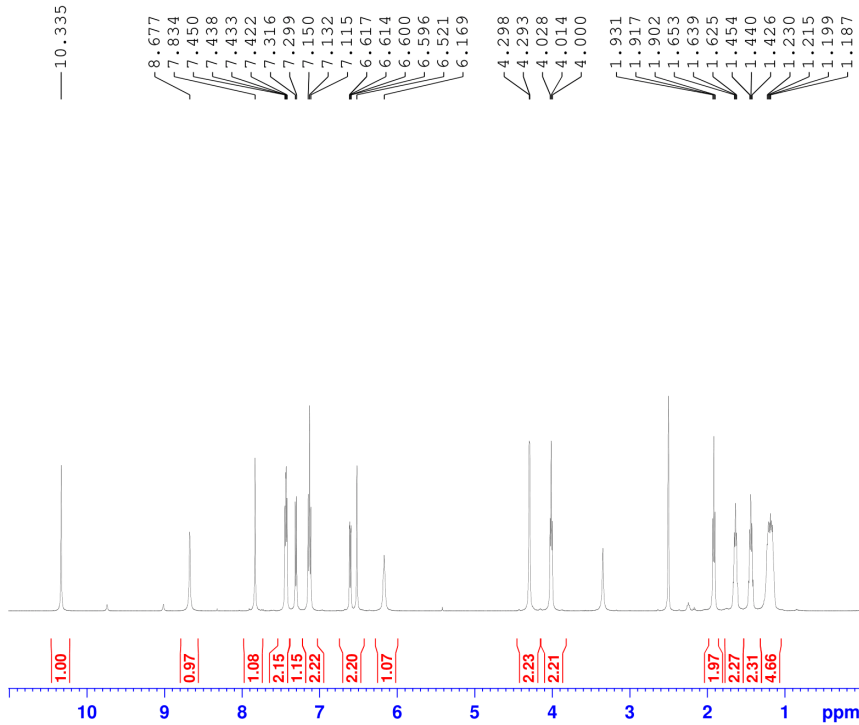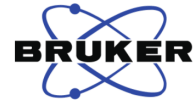

Current Data Parameters  
NAME TAnh-126E  
EXPNO 10  
PROCNO 1

F2 - Acquisition Parameters  
Date\_ 20221201  
Time 10.40  
INSTRUM spect  
PROBHD 5 mm PABBO BB/  
PULPROG zg30  
TD 65536  
SOLVENT DMSO  
NS 16  
DS 2  
SWH 10000.000 Hz  
FIDRES 0.152588 Hz  
AQ 3.2767999 sec  
RG 191.38  
DW 50.000 usec  
DE 6.50 usec  
TE 297.1 K  
D1 1.0000000 sec  
TD0 1

===== CHANNEL f1 =====  
SFO1 500.1330885 MHz  
NUC1 1H  
P1 9.80 usec  
PLW1 24.0000000 W

F2 - Processing parameters  
SI 65536  
SF 500.1300045 MHz  
WDW EM  
SSB 0  
LB 0.30 Hz  
GB 0  
PC 1.00

# <sup>13</sup>C NMR of compound 14e

TAnh-126E

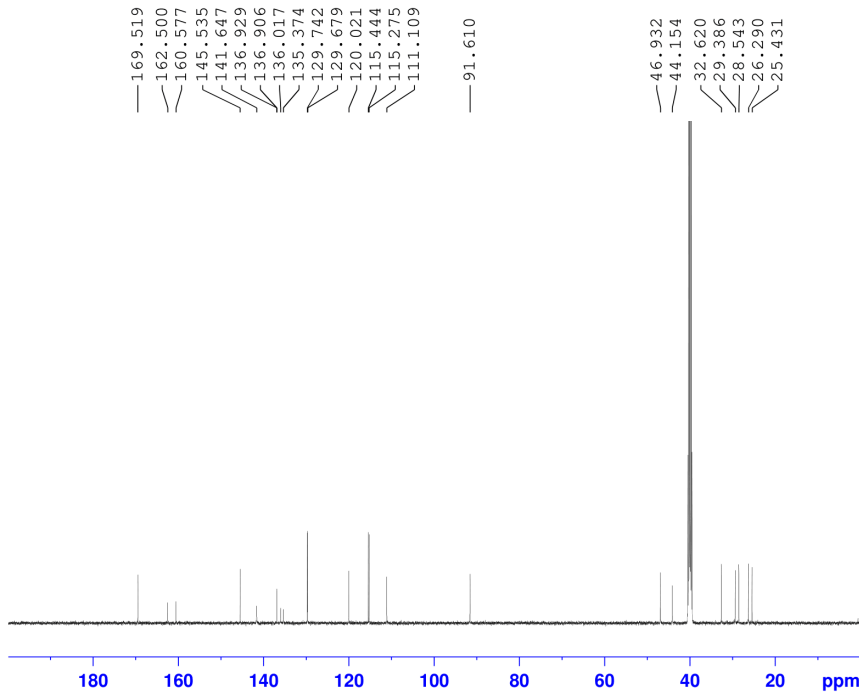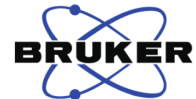

Current Data Parameters  
NAME TAnh-126E  
EXPNO 11  
PROCNO 1

F2 - Acquisition Parameters  
Date\_ 20221201  
Time 16.17  
INSTRUM spect  
PROBHD 5 mm PABBO BB/  
PULPROG zgpg30  
TD 65536  
SOLVENT DMSO  
NS 1024  
DS 4  
SWH 31250.000 Hz  
FIDRES 0.476837 Hz  
AQ 1.0485760 sec  
RG 191.38  
DW 16.000 usec  
DE 6.50 usec  
TE 298.1 K  
D1 2.0000000 sec  
D11 0.0300000 sec  
TD0 1

===== CHANNEL f1 =====  
SFO1 125.7703637 MHz  
NUC1 13C  
P1 10.20 usec  
PLW1 90.0000000 W

===== CHANNEL f2 =====  
SFO2 500.1320005 MHz  
NUC2 1H  
CPDPRG2 waltz16  
PCPD2 80.00 usec  
PLW2 24.0000000 W  
PLW12 0.36015001 W  
PLW13 0.23050000 W

F2 - Processing parameters  
SI 65536  
SF 125.7577885 MHz  
WDW EM  
SSB 0  
LB 1.00 Hz  
GB 0  
PC 1.40

# <sup>1</sup>H NMR of compound 14f

TAnh-126F

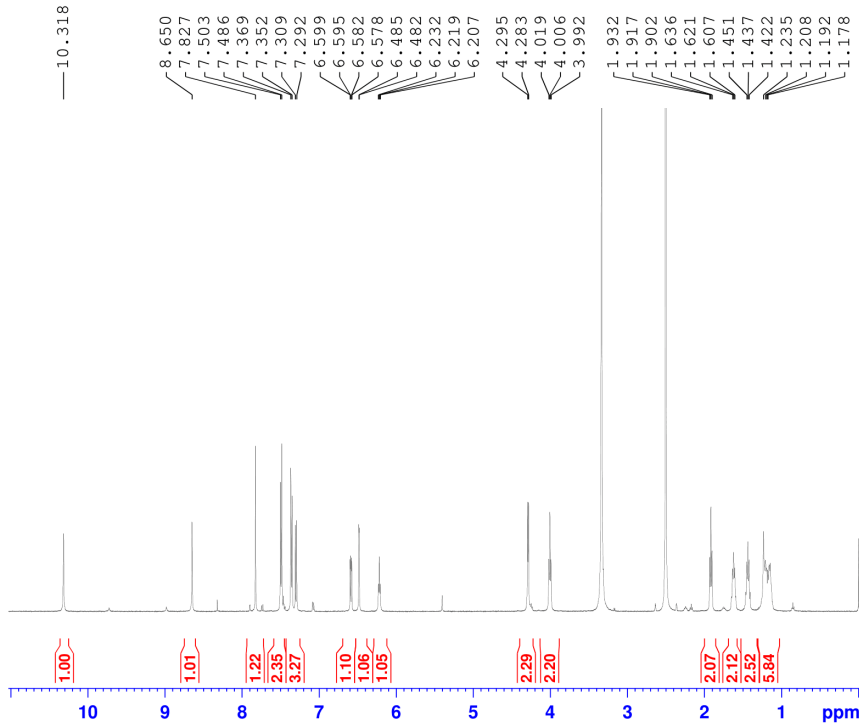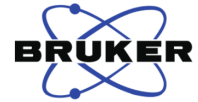

Current Data Parameters  
NAME TAnh-126F  
EXPNO 20  
PROCNO 1

F2 - Acquisition Parameters  
Date\_ 20220812  
Time 14.35  
INSTRUM spect  
PROBHD 5 mm PABBO BB/  
PULPROG zg30  
TD 65536  
SOLVENT DMSO  
NS 16  
DS 2  
SWH 10000.000 Hz  
FIDRES 0.152588 Hz  
AQ 3.2767999 sec  
RG 191.38  
DW 50.000 usec  
DE 6.50 usec  
TE 297.2 K  
D1 1.00000000 sec  
TD0 1

===== CHANNEL f1 =====  
SFO1 500.1330885 MHz  
NUC1 1H  
P1 9.80 usec  
PLW1 24.00000000 W

F2 - Processing parameters  
SI 65536  
SF 500.1300043 MHz  
WDW EM  
SSB 0  
LB 0.30 Hz  
GB 0  
PC 1.00

# <sup>13</sup>C NMR of compound 14f

TAnh-126F

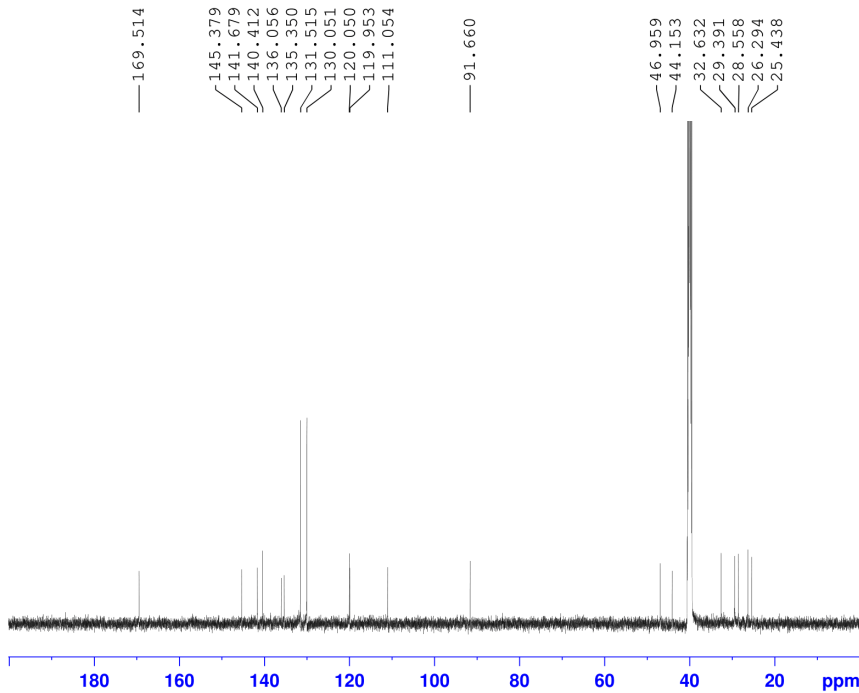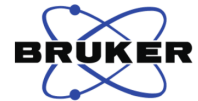

Current Data Parameters  
NAME TAnh-126F  
EXPNO 21  
PROCNO 1

F2 - Acquisition Parameters  
Date\_ 20220812  
Time 20.15  
INSTRUM spect  
PROBHD 5 mm PABBO BB/  
PULPROG zgpg30  
TD 65536  
SOLVENT DMSO  
NS 3072  
DS 4  
SWH 31250.000 Hz  
FIDRES 0.476837 Hz  
AQ 1.0485760 sec  
RG 191.38  
DW 16.000 usec  
DE 6.50 usec  
TE 298.2 K  
D1 2.00000000 sec  
D11 0.03000000 sec  
TD0 1

===== CHANNEL f1 =====  
SFO1 125.7703637 MHz  
NUC1 13C  
P1 10.20 usec  
PLW1 90.00000000 W

===== CHANNEL f2 =====  
SFO2 500.1320005 MHz  
NUC2 1H  
CPDPRG2 waltz16  
PCPD2 80.00 usec  
PLW2 24.00000000 W  
PLW12 0.36015001 W  
PLW13 0.23050000 W

F2 - Processing parameters  
SI 65536  
SF 125.7577885 MHz  
WDW EM  
SSB 0  
LB 1.00 Hz  
GB 0  
PC 1.40

# <sup>1</sup>H NMR of compound 14g

TAnh-126G

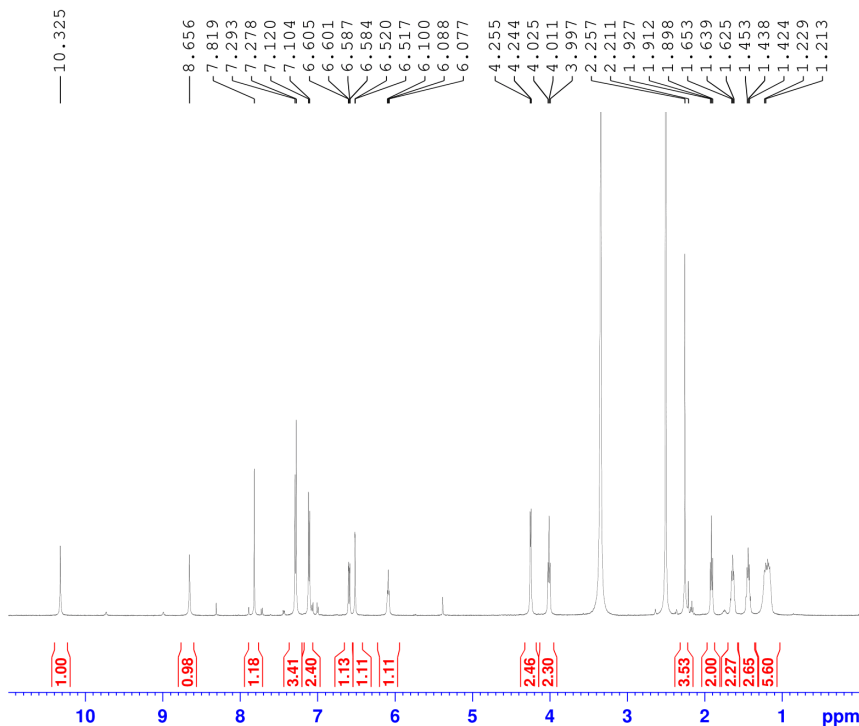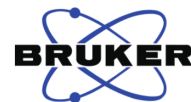

Current Data Parameters  
NAME TAnh-126G  
EXPNO 41  
PROCNO 1

F2 - Acquisition Parameters  
Date\_ 20220819  
Time 9.46  
INSTRUM spect  
PROBHD 5 mm PABBO BB/  
PULPROG zg30  
TD 65536  
SOLVENT DMSO  
NS 16  
DS 2  
SWH 10000.000 Hz  
FIDRES 0.152588 Hz  
AQ 3.2767999 sec  
RG 191.38  
DW 50.000 usec  
DE 6.50 usec  
TE 297.1 K  
D1 1.0000000 sec  
TD0 1

===== CHANNEL f1 =====  
SFO1 500.1330885 MHz  
NUC1 1H  
P1 9.80 usec  
PLW1 24.0000000 W

F2 - Processing parameters  
SI 65536  
SF 500.1300046 MHz  
WDW EM  
SSB 0  
LB 0.30 Hz  
GB 0  
PC 1.00

# <sup>13</sup>C NMR of compound 14g

TAnh-126G

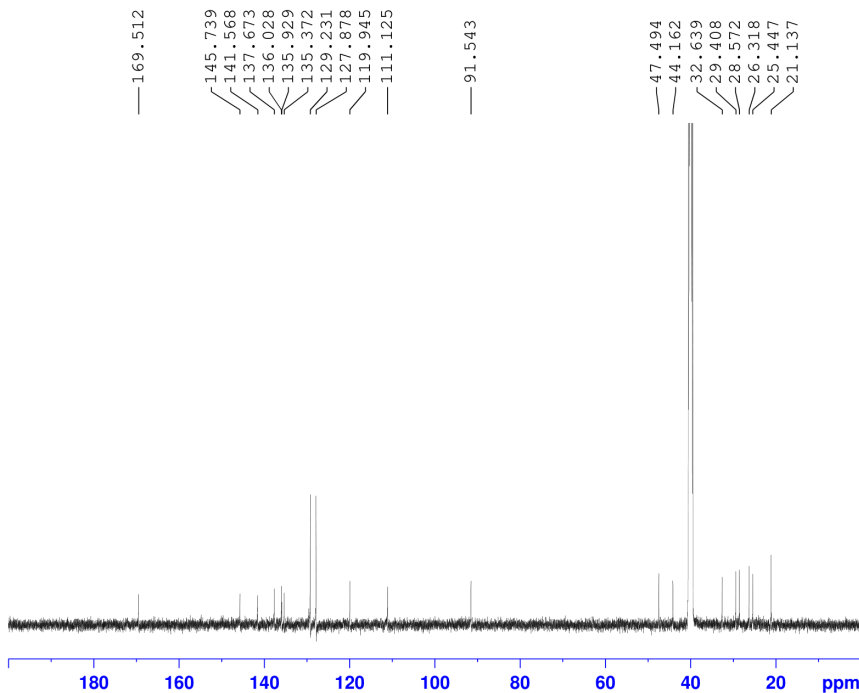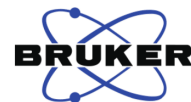

Current Data Parameters  
NAME TAnh-126G  
EXPNO 42  
PROCNO 1

F2 - Acquisition Parameters  
Date\_ 20220819  
Time 22.27  
INSTRUM spect  
PROBHD 5 mm PABBO BB/  
PULPROG zgpg30  
TD 65536  
SOLVENT DMSO  
NS 3072  
DS 4  
SWH 31250.000 Hz  
FIDRES 0.476837 Hz  
AQ 1.0485760 sec  
RG 191.38  
DW 16.000 usec  
DE 6.50 usec  
TE 299.2 K  
D1 2.0000000 sec  
D11 0.0300000 sec  
TD0 1

===== CHANNEL f1 =====  
SFO1 125.7703637 MHz  
NUC1 13C  
P1 10.20 usec  
PLW1 90.0000000 W

===== CHANNEL f2 =====  
SFO2 500.1320005 MHz  
NUC2 1H  
CPDPRG2 waltz16  
PCPD2 80.00 usec  
PLW2 24.0000000 W  
PLW12 0.36015001 W  
PLW13 0.23050000 W

F2 - Processing parameters  
SI 65536  
SF 125.7577885 MHz  
WDW EM  
SSB 0  
LB 1.00 Hz  
GB 0  
PC 1.40

# <sup>1</sup>H NMR of compound 17a

TAnh-127A

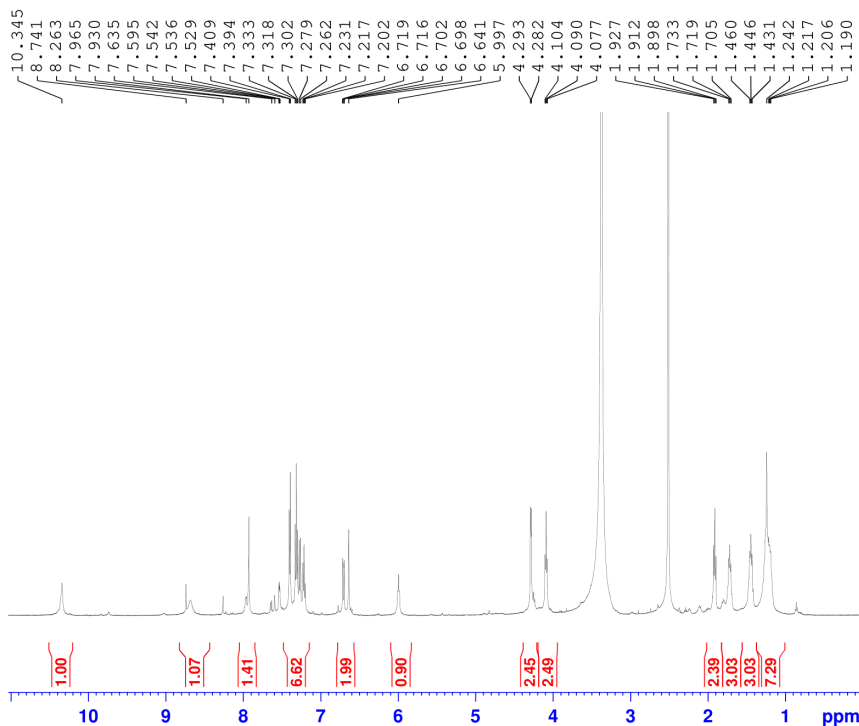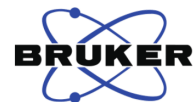

Current Data Parameters  
 NAME TAnh-127A  
 EXPNO 10  
 PROCNO 1

F2 - Acquisition Parameters  
 Date\_ 20221012  
 Time 10.05  
 INSTRUM spect  
 PROBHD 5 mm PABBO BB/  
 PULPROG zg30  
 TD 65536  
 SOLVENT DMSO  
 NS 16  
 DS 2  
 SWH 10000.000 Hz  
 FIDRES 0.152588 Hz  
 AQ 3.2767999 sec  
 RG 191.38  
 DW 50.000 usec  
 DE 6.50 usec  
 TE 295.7 K  
 D1 1.0000000 sec  
 TDO 1

===== CHANNEL f1 =====  
 SFO1 500.1330885 MHz  
 NUC1 1H  
 P1 9.80 usec  
 PLW1 24.0000000 W

F2 - Processing parameters  
 SI 65536  
 SF 500.1300000 MHz  
 WF EM  
 SSB 0  
 LB 0.30 Hz  
 GB 0  
 PC 1.00

# <sup>13</sup>C NMR of compound 17a

TAnh-127A

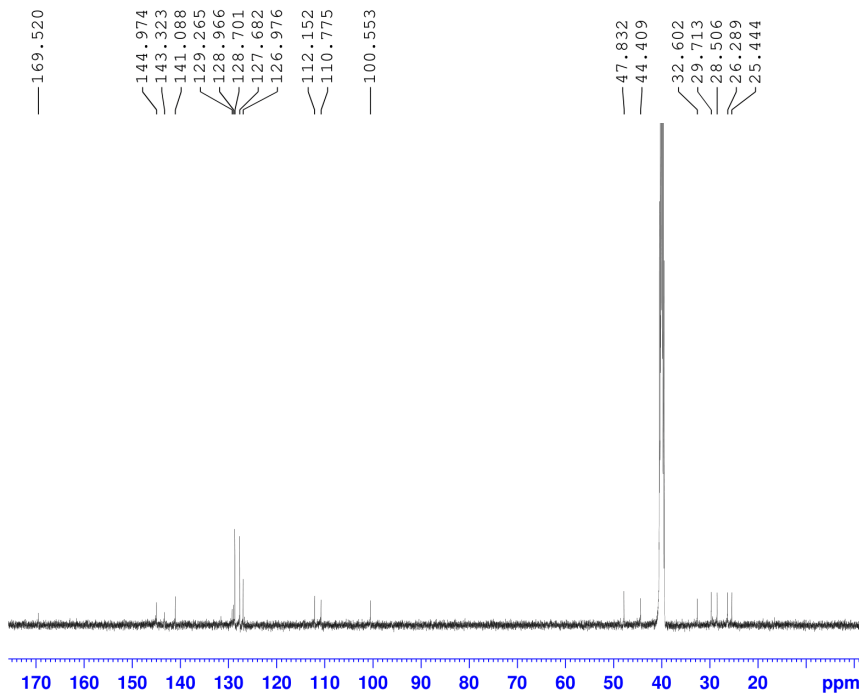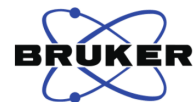

Current Data Parameters  
 NAME TAnh-127A  
 EXPNO 11  
 PROCNO 1

F2 - Acquisition Parameters  
 Date\_ 20221012  
 Time 16.28  
 INSTRUM spect  
 PROBHD 5 mm PABBO BB/  
 PULPROG zgpg30  
 TD 65536  
 SOLVENT DMSO  
 NS 1433  
 DS 4  
 SWH 31250.000 Hz  
 FIDRES 0.476837 Hz  
 AQ 1.0485760 sec  
 RG 191.38  
 DW 16.000 usec  
 DE 6.50 usec  
 TE 296.6 K  
 D1 2.0000000 sec  
 D11 0.0300000 sec  
 TDO 1

===== CHANNEL f1 =====  
 SFO1 125.7703637 MHz  
 NUC1 13C  
 P1 10.20 usec  
 PLW1 90.0000000 W

===== CHANNEL f2 =====  
 SFO2 500.1320005 MHz  
 NUC2 1H  
 CPDPRG2 waltz16  
 PCPD2 80.00 usec  
 PLW2 24.0000000 W  
 PLW12 0.36015001 W  
 PLW13 0.23050000 W

F2 - Processing parameters  
 SI 65536  
 SF 125.7577885 MHz  
 WF EM  
 SSB 0  
 LB 1.00 Hz  
 GB 0  
 PC 1.40

# <sup>1</sup>H NMR of compound 17b

TAnh-127B

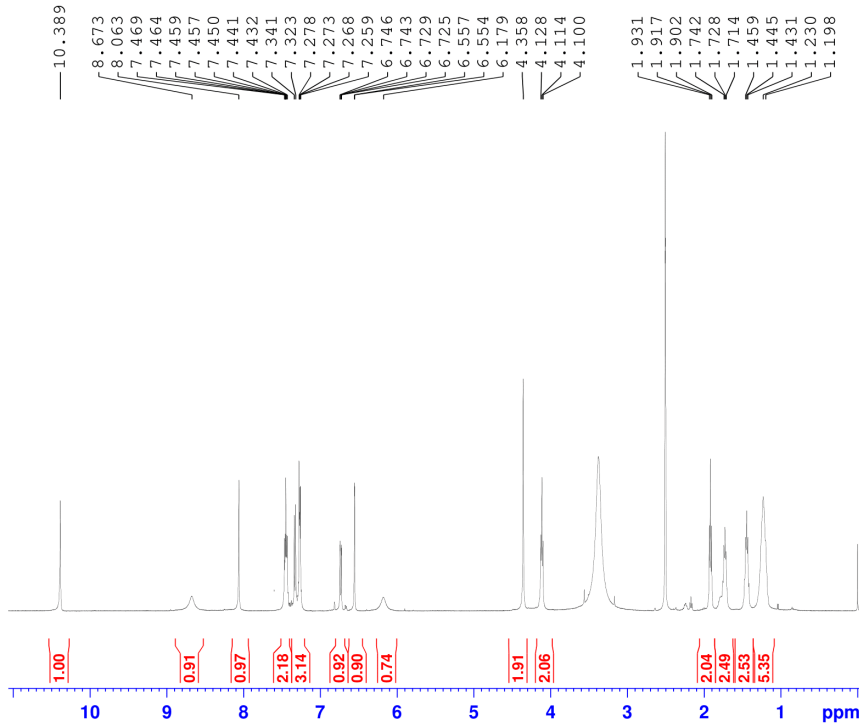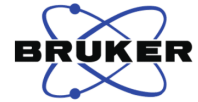

Current Data Parameters  
NAME TAnh-127B  
EXPNO 90  
PROCNO 1

F2 - Acquisition Parameters  
Date\_ 20221201  
Time 11.10  
INSTRUM spect  
PROBHD 5 mm PABBO BB/  
PULPROG zg30  
TD 65536  
SOLVENT DMSO  
NS 16  
DS 2  
SWH 10000.000 Hz  
FIDRES 0.152588 Hz  
AQ 3.2767999 sec  
RG 191.38  
DW 50.000 usec  
DE 6.50 usec  
TE 296.8 K  
D1 1.00000000 sec  
TD0 1

===== CHANNEL f1 =====  
SFO1 500.1330885 MHz  
NUC1 1H  
P1 9.80 usec  
PLW1 24.0000000 W

F2 - Processing parameters  
SI 65536  
SF 500.1300027 MHz  
WDW EM  
SSB 0  
LB 0.30 Hz  
GB 0  
PC 1.00

# <sup>13</sup>C NMR of compound 17b

TAnh-127B

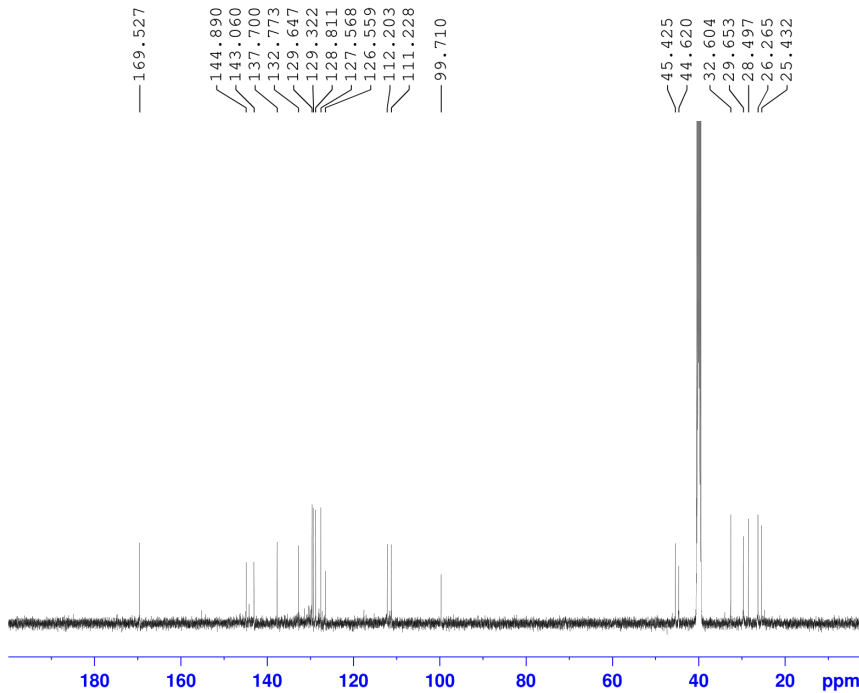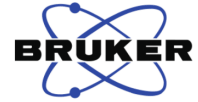

Current Data Parameters  
NAME TAnh-127B  
EXPNO 91  
PROCNO 1

F2 - Acquisition Parameters  
Date\_ 20221203  
Time 13.37  
INSTRUM spect  
PROBHD 5 mm PABBO BB/  
PULPROG zgpg30  
TD 65536  
SOLVENT DMSO  
NS 2048  
DS 4  
SWH 31250.000 Hz  
FIDRES 0.476837 Hz  
AQ 1.0485760 sec  
RG 191.38  
DW 16.000 usec  
DE 6.50 usec  
TE 298.5 K  
D1 2.00000000 sec  
D11 0.03000000 sec  
TD0 1

===== CHANNEL f1 =====  
SFO1 125.7703637 MHz  
NUC1 13C  
P1 10.20 usec  
PLW1 90.0000000 W

===== CHANNEL f2 =====  
SFO2 500.1320005 MHz  
NUC2 1H  
CPDPRG2 waltz16  
PCPD2 80.00 usec  
PLW2 24.0000000 W  
PLW12 0.36015001 W  
PLW13 0.23050000 W

F2 - Processing parameters  
SI 65536  
SF 125.7577885 MHz  
WDW EM  
SSB 0  
LB 1.00 Hz  
GB 0  
PC 1.40

# <sup>1</sup>H NMR of compound 17c

TAnh-127C

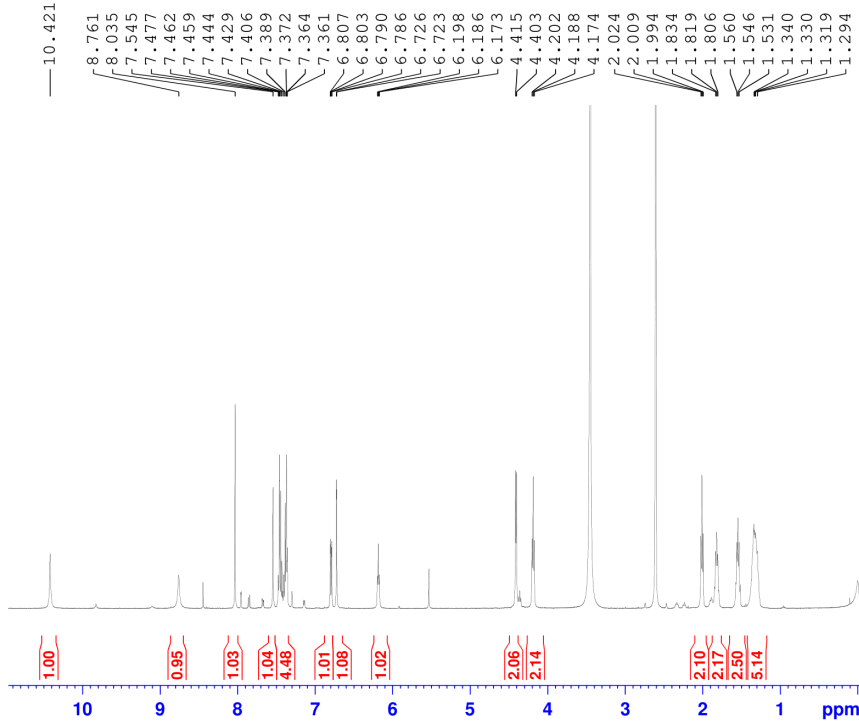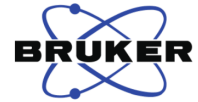

Current Data Parameters  
NAME TAnh-127C  
EXPNO 10  
PROCNO 1

F2 - Acquisition Parameters  
Date\_ 20220904  
Time 14.48  
INSTRUM spect  
PROBHD 5 mm PABBO BB/  
PULPROG zg30  
TD 65536  
SOLVENT DMSO  
NS 16  
DS 2  
SWH 10000.000 Hz  
FIDRES 0.152588 Hz  
AQ 3.2767999 sec  
RG 191.38  
DW 50.000 usec  
DE 6.50 usec  
TE 297.1 K  
D1 1.00000000 sec  
TD0 1

===== CHANNEL f1 =====  
SFO1 500.1330885 MHz  
NUC1 1H  
P1 9.80 usec  
PLW1 24.00000000 W

F2 - Processing parameters  
SI 65536  
SF 500.1299516 MHz  
WDW EM  
SSB 0  
LB 0.30 Hz  
GB 0  
PC 1.00

# <sup>13</sup>C NMR of compound 17c

TAnh-127C

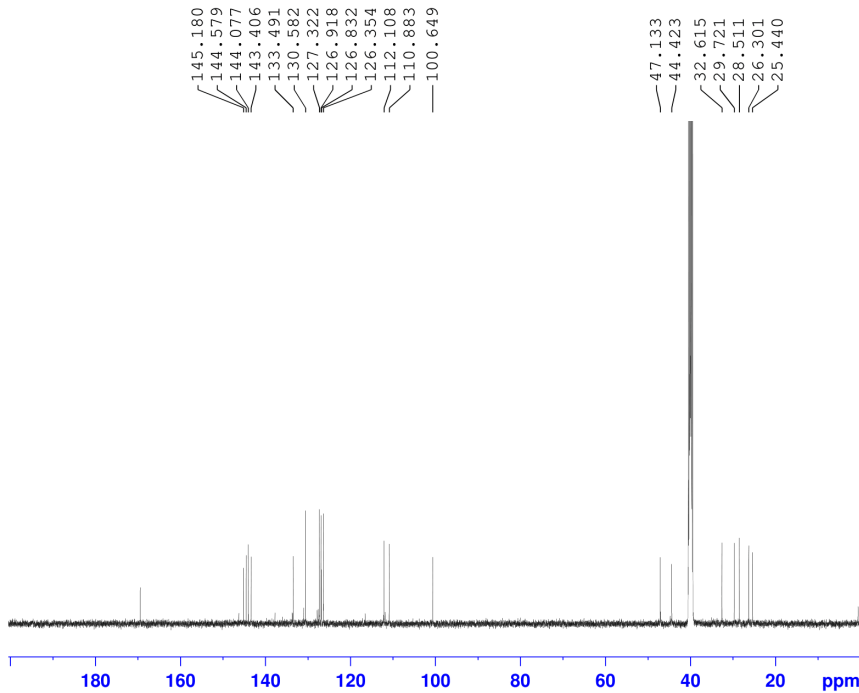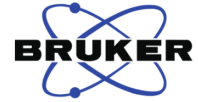

Current Data Parameters  
NAME TAnh-127C  
EXPNO 11  
PROCNO 1

F2 - Acquisition Parameters  
Date\_ 20220904  
Time 18.22  
INSTRUM spect  
PROBHD 5 mm PABBO BB/  
PULPROG zgpg30  
TD 65536  
SOLVENT DMSO  
NS 4096  
DS 4  
SWH 31250.000 Hz  
FIDRES 0.476837 Hz  
AQ 1.0485760 sec  
RG 191.38  
DW 16.000 usec  
DE 6.50 usec  
TE 298.3 K  
D1 2.00000000 sec  
D11 0.03000000 sec  
TD0 1

===== CHANNEL f1 =====  
SFO1 125.7703637 MHz  
NUC1 13C  
P1 10.20 usec  
PLW1 90.00000000 W

===== CHANNEL f2 =====  
SFO2 500.1320005 MHz  
NUC2 1H  
CPDPRG2 waltz16  
PCPD2 80.00 usec  
PLW2 24.00000000 W  
PLW12 0.36015001 W  
PLW13 0.23050000 W

F2 - Processing parameters  
SI 65536  
SF 125.7577885 MHz  
WDW EM  
SSB 0  
LB 1.00 Hz  
GB 0  
PC 1.40



# <sup>1</sup>H NMR of compound 17d

TAnh-127D

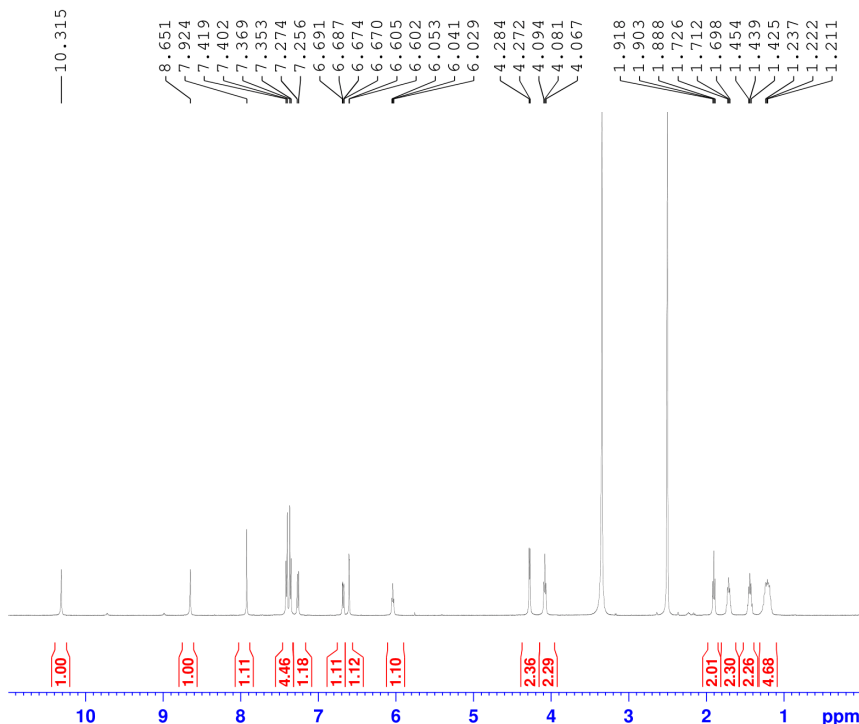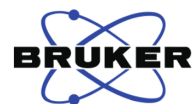

Current Data Parameters  
NAME TAnh-127D  
EXPNO 10  
PROCNO 1

F2 - Acquisition Parameters  
Date\_ 20220817  
Time 9.45  
INSTRUM spect  
PROBHD 5 mm PABBO BB/  
PULPROG zg30  
TD 65536  
SOLVENT DMSO  
NS 16  
DS 2  
SWH 10000.000 Hz  
FIDRES 0.152588 Hz  
AQ 3.2767999 sec  
RG 191.38  
DW 50.000 usec  
DE 6.50 usec  
TE 296.8 K  
D1 1.00000000 sec  
TD0 1

===== CHANNEL f1 =====  
SFO1 500.1330885 MHz  
NUC1 1H  
P1 9.80 usec  
PLW1 24.0000000 W

F2 - Processing parameters  
SI 65536  
SF 500.1300042 MHz  
WDW EM  
SSB 0  
LB 0.30 Hz  
GB 0  
PC 1.00

# <sup>13</sup>C NMR of compound 17d

TAnh-127D

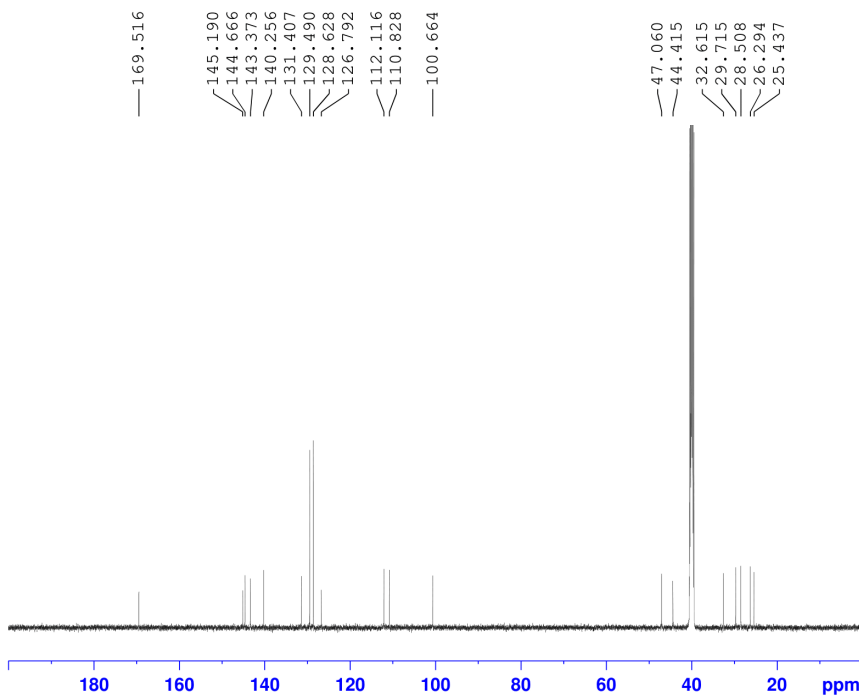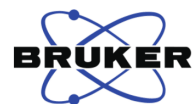

Current Data Parameters  
NAME TAnh-127D  
EXPNO 11  
PROCNO 1

F2 - Acquisition Parameters  
Date\_ 20220819  
Time 3.40  
INSTRUM spect  
PROBHD 5 mm PABBO BB/  
PULPROG zgpg30  
TD 65536  
SOLVENT DMSO  
NS 4096  
DS 4  
SWH 31250.000 Hz  
FIDRES 0.476837 Hz  
AQ 1.0485760 sec  
RG 191.38  
DW 16.000 usec  
DE 6.50 usec  
TE 298.6 K  
D1 2.00000000 sec  
D11 0.03000000 sec  
TD0 1

===== CHANNEL f1 =====  
SFO1 125.7703637 MHz  
NUC1 13C  
P1 10.20 usec  
PLW1 90.0000000 W

===== CHANNEL f2 =====  
SFO2 500.1320005 MHz  
NUC2 1H  
CPDPRG2 waltz16  
PCPD2 80.00 usec  
PLW2 24.0000000 W  
PLW12 0.36015001 W  
PLW13 0.23050000 W

F2 - Processing parameters  
SI 65536  
SF 125.7577885 MHz  
WDW EM  
SSB 0  
LB 1.00 Hz  
GB 0  
PC 1.40

# <sup>1</sup>H NMR of compound 17e

TAnh-127E

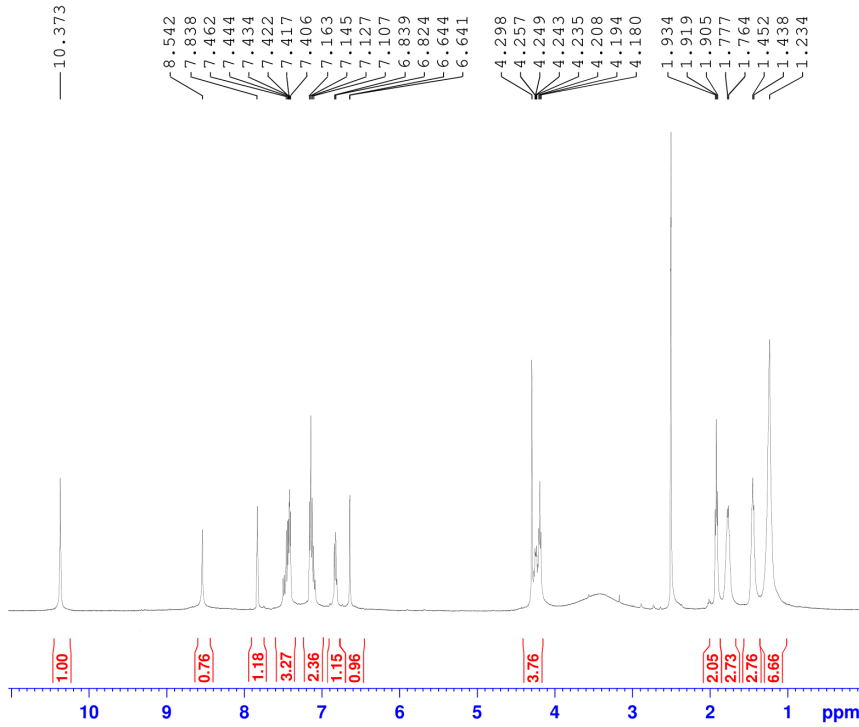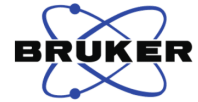

Current Data Parameters  
NAME TAnh-127E  
EXPNO 100  
PROCNO 1

F2 - Acquisition Parameters  
Date\_ 20221201  
Time 11.14  
INSTRUM spect  
PROBHD 5 mm PABBO BB/  
PULPROG zg30  
TD 65536  
SOLVENT DMSO  
NS 16  
DS 2  
SWH 10000.000 Hz  
FIDRES 0.152588 Hz  
AQ 3.2767999 sec  
RG 191.38  
DW 50.000 usec  
DE 6.50 usec  
TE 296.9 K  
D1 1.00000000 sec  
TD0 1

===== CHANNEL f1 =====  
SFO1 500.1330885 MHz  
NUC1 1H  
P1 9.80 usec  
PLW1 24.0000000 W

F2 - Processing parameters  
SI 65536  
SF 500.1300031 MHz  
WDW EM  
SSB 0  
LB 0.30 Hz  
GB 0  
PC 1.00

# <sup>13</sup>C NMR of compound 17e

TAnh-127E

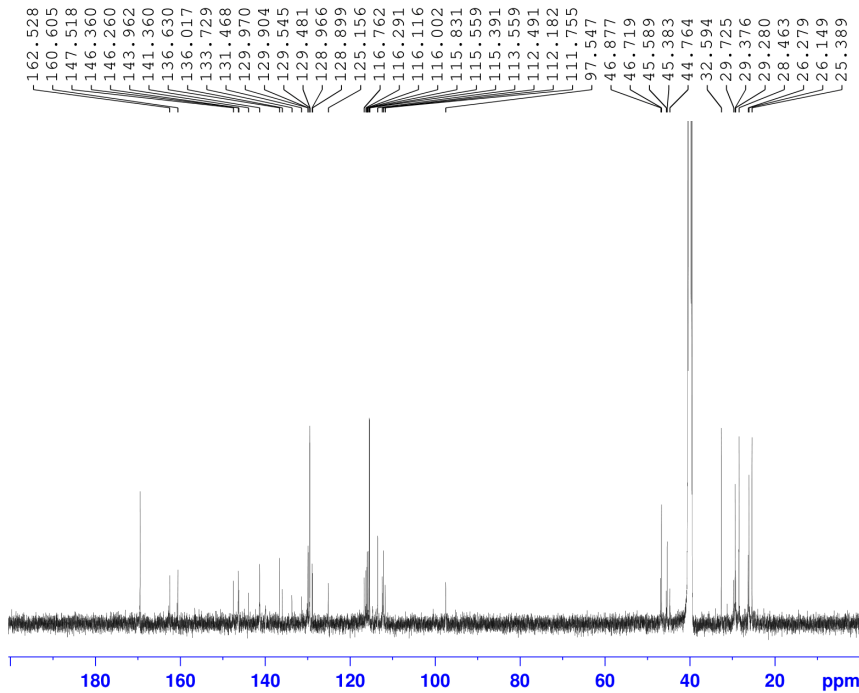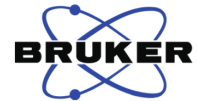

Current Data Parameters  
NAME TAnh-127E  
EXPNO 101  
PROCNO 1

F2 - Acquisition Parameters  
Date\_ 20221203  
Time 15.26  
INSTRUM spect  
PROBHD 5 mm PABBO BB/  
PULPROG zgpg30  
TD 65536  
SOLVENT DMSO  
NS 2048  
DS 4  
SWH 31250.000 Hz  
FIDRES 0.476837 Hz  
AQ 1.0485760 sec  
RG 191.38  
DW 16.000 usec  
DE 6.50 usec  
TE 298.3 K  
D1 2.00000000 sec  
D11 0.03000000 sec  
TD0 1

===== CHANNEL f1 =====  
SFO1 125.7703637 MHz  
NUC1 13C  
P1 10.20 usec  
PLW1 90.0000000 W

===== CHANNEL f2 =====  
SFO2 500.1320005 MHz  
NUC2 1H  
CPDPRG2 waltz16  
PCPD2 80.00 usec  
PLW2 24.0000000 W  
PLW12 0.36015001 W  
PLW13 0.23050000 W

F2 - Processing parameters  
SI 65536  
SF 125.7577885 MHz  
WDW EM  
SSB 0  
LB 1.00 Hz  
GB 0  
PC 1.40

# <sup>1</sup>H NMR of compound 17f

TAnh-127F

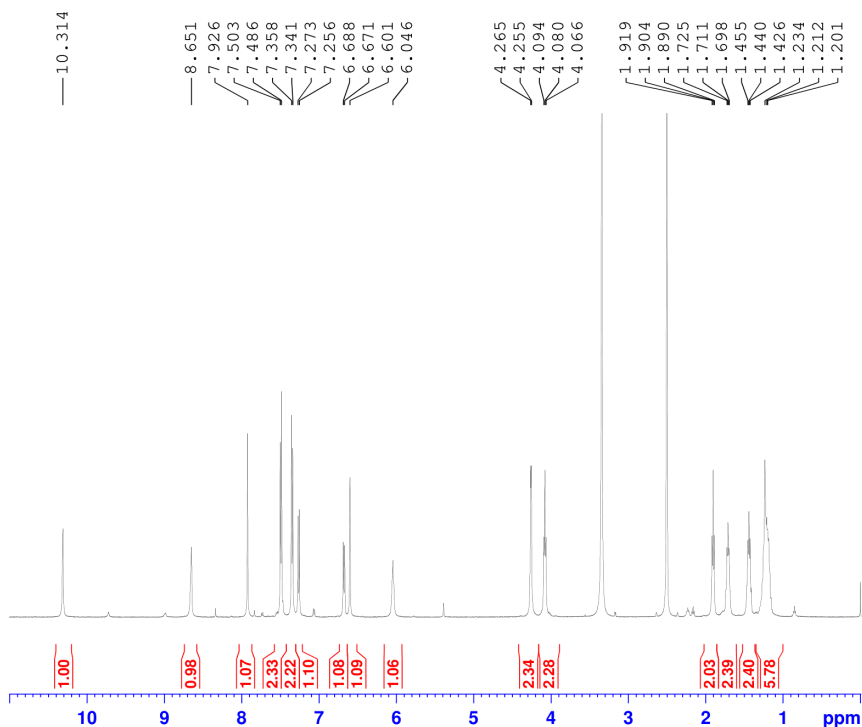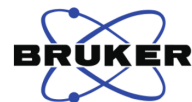

Current Data Parameters  
NAME TAnh-127F  
EXPNO 30  
PROCNO 1

F2 - Acquisition Parameters  
Date\_ 20220812  
Time 14.38  
INSTRUM spect  
PROBHD 5 mm PABBO BB/  
PULPROG zg30  
TD 65536  
SOLVENT DMSO  
NS 16  
DS 2  
SWH 10000.000 Hz  
FIDRES 0.152588 Hz  
AQ 3.2767999 sec  
RG 191.38  
DW 50.000 usec  
DE 6.50 usec  
TE 297.0 K  
D1 1.00000000 sec  
TD0 1

===== CHANNEL f1 =====  
SFO1 500.1330885 MHz  
NUC1 1H  
P1 9.80 usec  
PLW1 24.0000000 W

F2 - Processing parameters  
SI 65536  
SF 500.1300044 MHz  
WDW EM  
SSB 0  
LB 0.30 Hz  
GB 0  
PC 1.00

# <sup>13</sup>C NMR of compound 17f

TAnh-127F

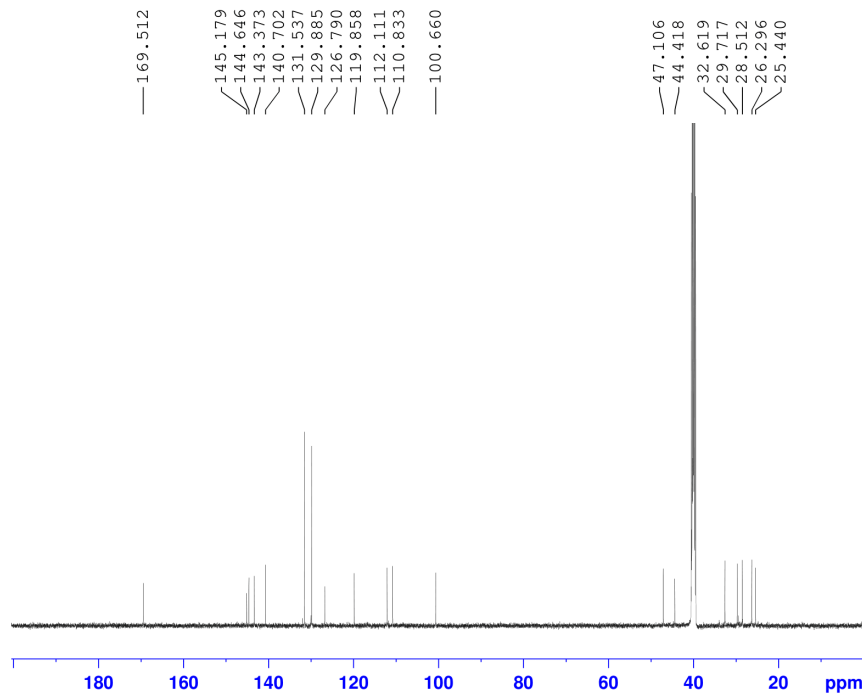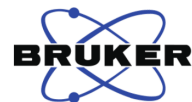

Current Data Parameters  
NAME TAnh-127F  
EXPNO 31  
PROCNO 1

F2 - Acquisition Parameters  
Date\_ 20220812  
Time 22.58  
INSTRUM spect  
PROBHD 5 mm PABBO BB/  
PULPROG zgpg30  
TD 65536  
SOLVENT DMSO  
NS 3072  
DS 4  
SWH 31250.000 Hz  
FIDRES 0.476837 Hz  
AQ 1.0485760 sec  
RG 191.38  
DW 16.000 usec  
DE 6.50 usec  
TE 298.5 K  
D1 2.00000000 sec  
D11 0.03000000 sec  
TD0 1

===== CHANNEL f1 =====  
SFO1 125.7703637 MHz  
NUC1 13C  
P1 10.20 usec  
PLW1 90.0000000 W

===== CHANNEL f2 =====  
SFO2 500.1320005 MHz  
NUC2 1H  
CPDPRG2 waltz16  
PCPD2 80.00 usec  
PLW2 24.0000000 W  
PLW12 0.36015001 W  
PLW13 0.23050000 W

F2 - Processing parameters  
SI 65536  
SF 125.7577885 MHz  
WDW EM  
SSB 0  
LB 1.00 Hz  
GB 0  
PC 1.40

# <sup>1</sup>H NMR of compound 17g

TAnh-127G

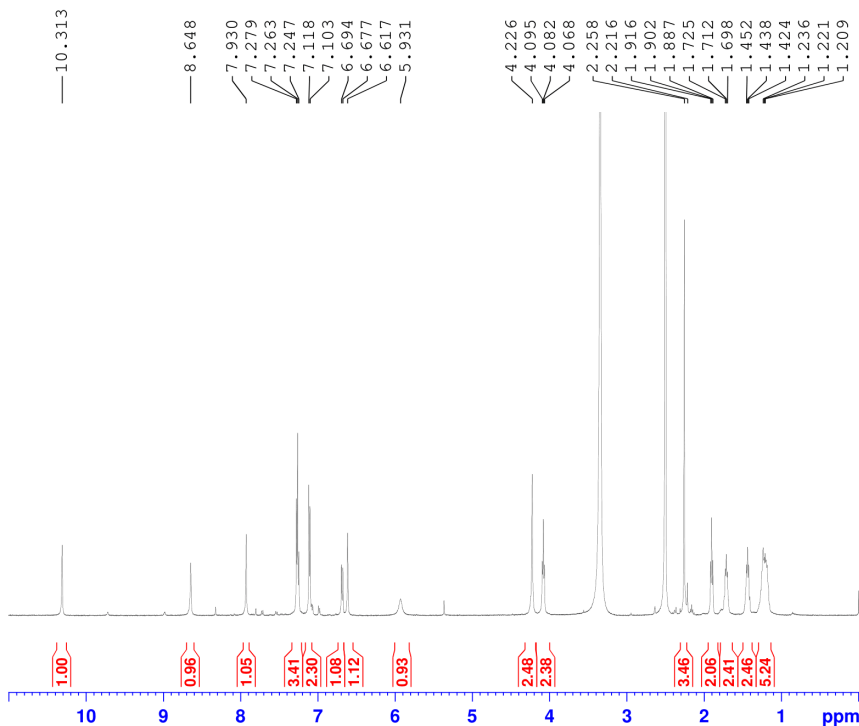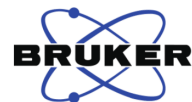

Current Data Parameters  
NAME TAnh-127G  
EXPNO 20  
PROCNO 1

F2 - Acquisition Parameters  
Date\_ 20220817  
Time 9.48  
INSTRUM spect  
PROBHD 5 mm PABBO BB/  
PULPROG zg30  
TD 65536  
SOLVENT DMSO  
NS 16  
DS 2  
SWH 10000.000 Hz  
FIDRES 0.152588 Hz  
AQ 3.2767999 sec  
RG 191.38  
DW 50.000 usec  
DE 6.50 usec  
TE 296.7 K  
D1 1.00000000 sec  
TD0 1

===== CHANNEL f1 =====  
SFO1 500.1330885 MHz  
NUC1 1H  
P1 9.80 usec  
PLW1 24.0000000 W

F2 - Processing parameters  
SI 65536  
SF 500.1300045 MHz  
WDW EM  
SSB 0  
LB 0.30 Hz  
GB 0  
PC 1.00

# <sup>13</sup>C NMR of compound 17g

TAnh-127G

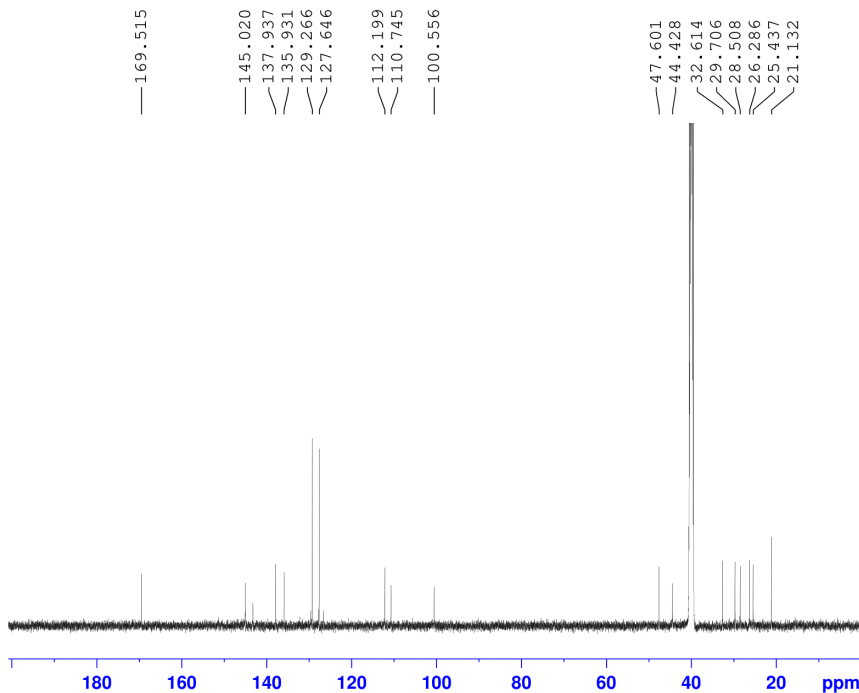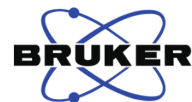

Current Data Parameters  
NAME TAnh-127G  
EXPNO 22  
PROCNO 1

F2 - Acquisition Parameters  
Date\_ 20220819  
Time 7.15  
INSTRUM spect  
PROBHD 5 mm PABBO BB/  
PULPROG zgpg30  
TD 65536  
SOLVENT DMSO  
NS 4096  
DS 4  
SWH 31250.000 Hz  
FIDRES 0.476837 Hz  
AQ 1.0485760 sec  
RG 191.38  
DW 16.000 usec  
DE 6.50 usec  
TE 298.5 K  
D1 2.00000000 sec  
D11 0.03000000 sec  
TD0 1

===== CHANNEL f1 =====  
SFO1 125.7703637 MHz  
NUC1 13C  
P1 10.20 usec  
PLW1 90.0000000 W

===== CHANNEL f2 =====  
SFO2 500.1320005 MHz  
NUC2 1H  
CPDPRG2 waltz16  
PCPD2 80.00 usec  
PLW2 24.0000000 W  
PLW12 0.36015001 W  
PLW13 0.23050000 W

F2 - Processing parameters  
SI 65536  
SF 125.7577885 MHz  
WDW EM  
SSB 0  
LB 1.00 Hz  
GB 0  
PC 1.40

# <sup>1</sup>H NMR of compound 22a

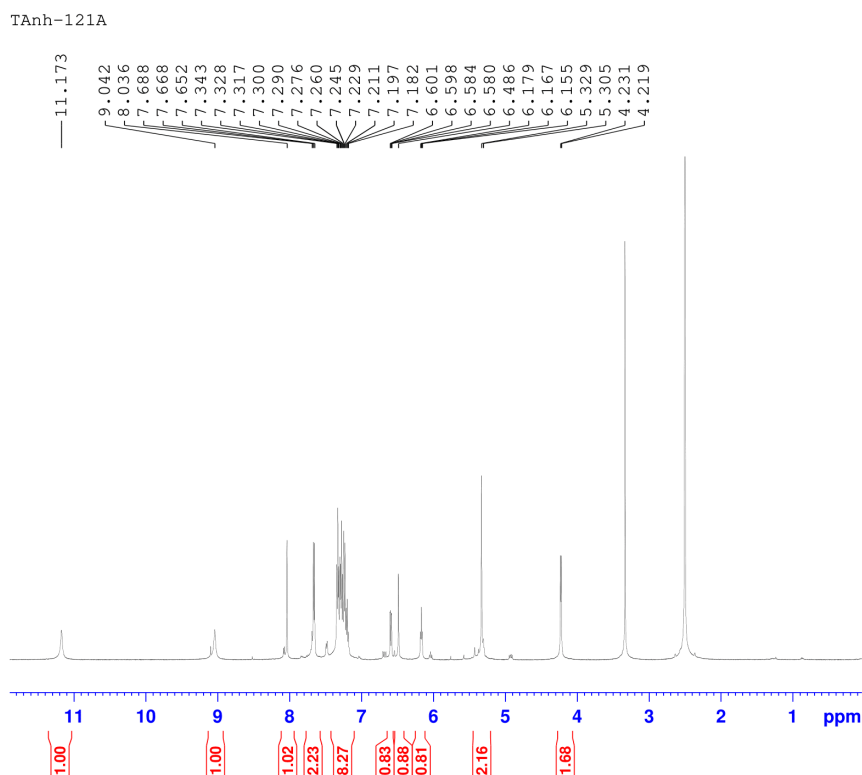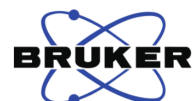

Current Data Parameters  
 NAME TAnh-121A  
 EXPNO 30  
 PROCNO 1

F2 - Acquisition Parameters  
 Date\_ 20220105  
 Time 8.07  
 INSTRUM spect  
 PROBHD 5 mm PABBO BB/  
 PULPROG zg30  
 TD 65536  
 SOLVENT DMSO  
 NS 16  
 DS 2  
 SWH 10000.000 Hz  
 FIDRES 0.152588 Hz  
 AQ 3.2767999 sec  
 RG 191.38  
 DW 50.000 usec  
 DE 6.50 usec  
 TE 297.1 K  
 D1 1.0000000 sec  
 TD0 1

===== CHANNEL f1 =====  
 SFO1 500.1330885 MHz  
 NUC1 1H  
 P1 9.80 usec  
 PLW1 24.0000000 W

F2 - Processing parameters  
 SI 65536  
 SF 500.1300060 MHz  
 WDW EM  
 SSB 0  
 LB 0.30 Hz  
 GB 0  
 PC 1.00

# <sup>13</sup>C NMR of compound 22a

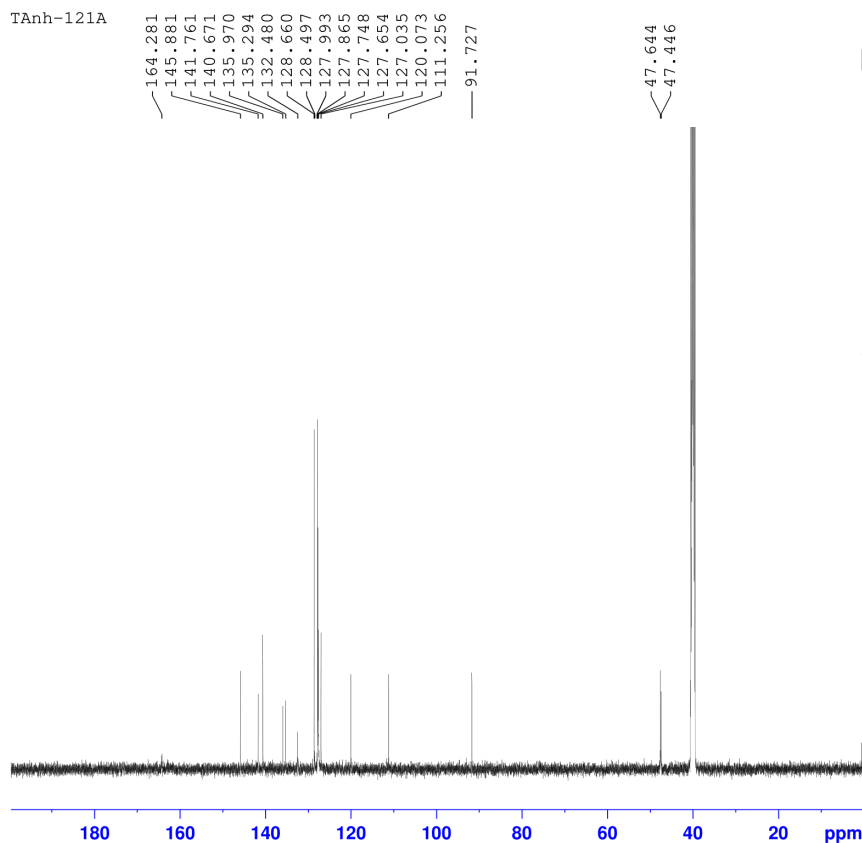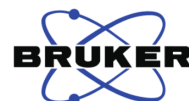

Current Data Parameters  
 NAME TAnh-121A  
 EXPNO 32  
 PROCNO 1

F2 - Acquisition Parameters  
 Date\_ 20220105  
 Time 17.01  
 INSTRUM spect  
 PROBHD 5 mm PABBO BB/  
 PULPROG zgpg30  
 TD 65536  
 SOLVENT DMSO  
 NS 2048  
 DS 4  
 SWH 31250.000 Hz  
 FIDRES 0.476837 Hz  
 AQ 1.0485760 sec  
 RG 191.38  
 DW 16.000 usec  
 DE 6.50 usec  
 TE 297.7 K  
 D1 2.0000000 sec  
 D11 0.0300000 sec  
 TD0 1

===== CHANNEL f1 =====  
 SFO1 125.7703637 MHz  
 NUC1 13C  
 P1 10.20 usec  
 PLW1 90.0000000 W

===== CHANNEL f2 =====  
 SFO2 500.1320005 MHz  
 NUC2 1H  
 CPDPRG[2] waltz16  
 PCPD2 80.00 usec  
 PLW2 24.0000000 W  
 PLW12 0.36015001 W  
 PLW13 0.23050000 W

F2 - Processing parameters  
 SI 65536  
 SF 125.7577885 MHz  
 WDW EM  
 SSB 0  
 LB 1.00 Hz  
 GB 0  
 PC 1.40

# <sup>1</sup>H NMR of compound 22b

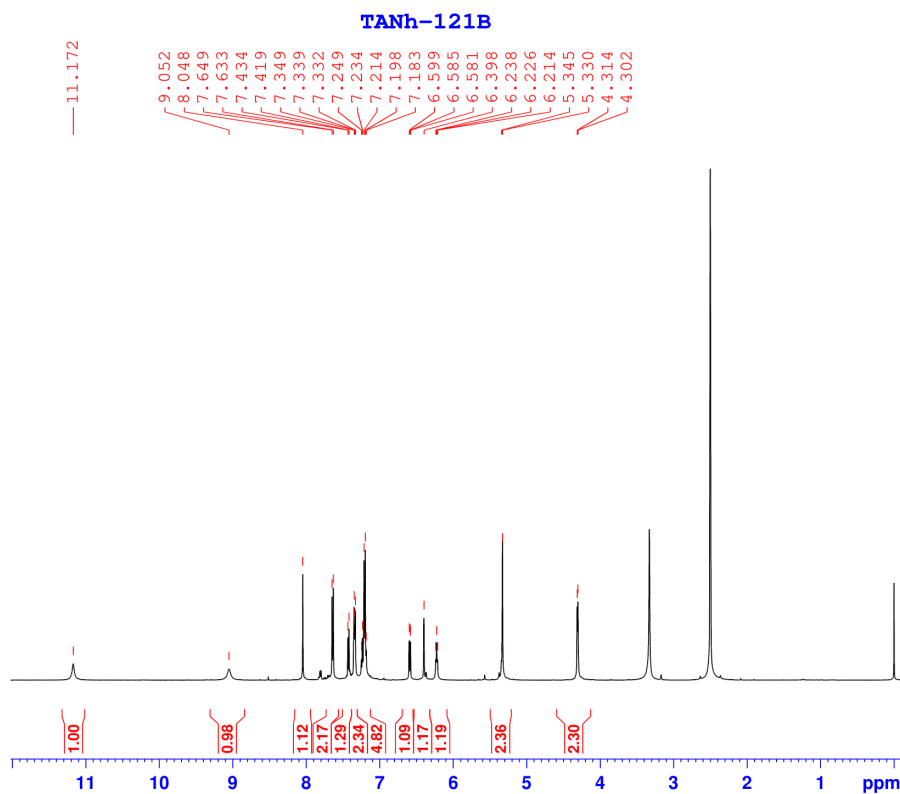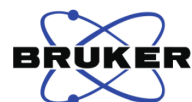

Current Data Parameters  
NAME TANh-121B  
EXPNO 10  
PROCNO 1

F2 - Acquisition Parameters  
Date\_ 20211208  
Time\_ 20.54  
INSTRUM spect  
PROBHD 5 mm PABBO BB/  
PULPROG zg30  
TD 65536  
SOLVENT DMSO  
NS 16  
DS 2  
SWH 10000.000 Hz  
FIDRES 0.152588 Hz  
AQ 3.2767999 sec  
RG 191.38  
DW 50.000 usec  
DE 6.50 usec  
TE 297.5 K  
D1 1.00000000 sec  
TD0 1

==== CHANNEL f1 =====  
SF01 500.1330885 MHz  
NUC1 1H  
P1 9.80 usec  
PLW1 24.00000000 W

F2 - Processing parameters  
SI 65536  
SF 500.1300048 MHz  
WDW EM  
SSB 0  
LB 0.30 Hz  
GB 0  
PC 1.00

# <sup>13</sup>C NMR of compound 22b

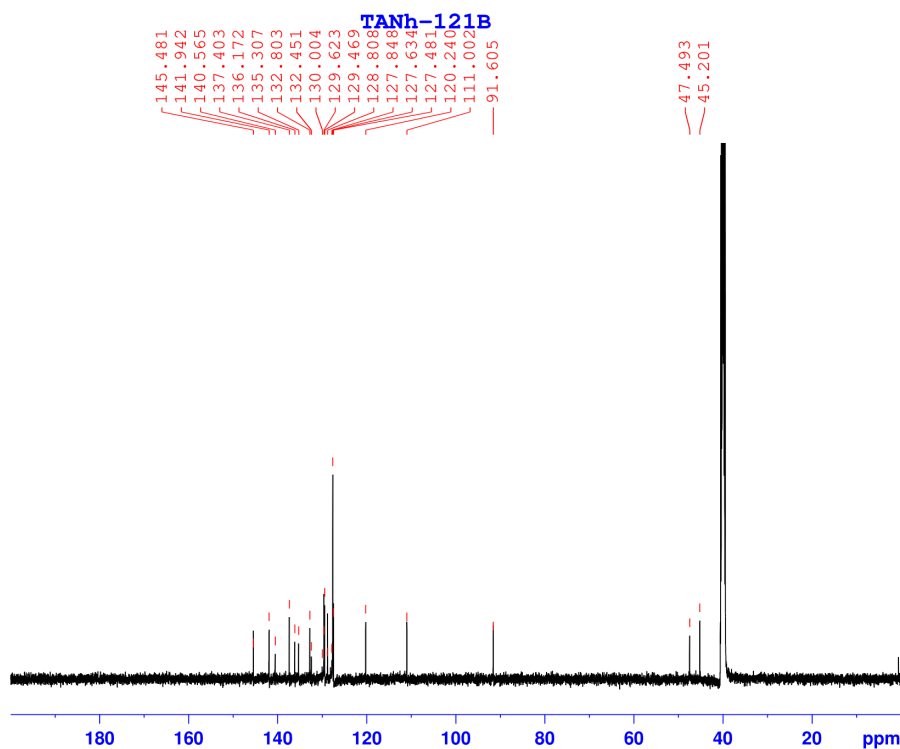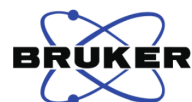

Current Data Parameters  
NAME TANh-121B  
EXPNO 20  
PROCNO 1

F2 - Acquisition Parameters  
Date\_ 20211210  
Time\_ 10.06  
INSTRUM spect  
PROBHD 5 mm PABBO BB/  
PULPROG zgpg30  
TD 65536  
SOLVENT DMSO  
NS 1676  
DS 4  
SWH 31250.000 Hz  
FIDRES 0.476837 Hz  
AQ 1.0485760 sec  
RG 191.38  
DW 16.000 usec  
DE 6.50 usec  
TE 297.5 K  
D1 2.00000000 sec  
D11 0.03000000 sec  
TD0 1

==== CHANNEL f1 =====  
SF01 125.7703637 MHz  
NUC1 13C  
P1 10.20 usec  
PLW1 90.00000000 W

==== CHANNEL f2 =====  
SFO2 500.1320005 MHz  
NUC2 1H  
CPDPRG2 waltz16  
PCPD2 80.00 usec  
PLW2 24.00000000 W  
PLW12 0.36015001 W  
PLW13 0.23050000 W

F2 - Processing parameters  
SI 65536  
SF 125.7577885 MHz  
WDW EM  
SSB 0  
LB 1.00 Hz  
GB 0  
PC 1.40

# <sup>1</sup>H NMR of compound 22c

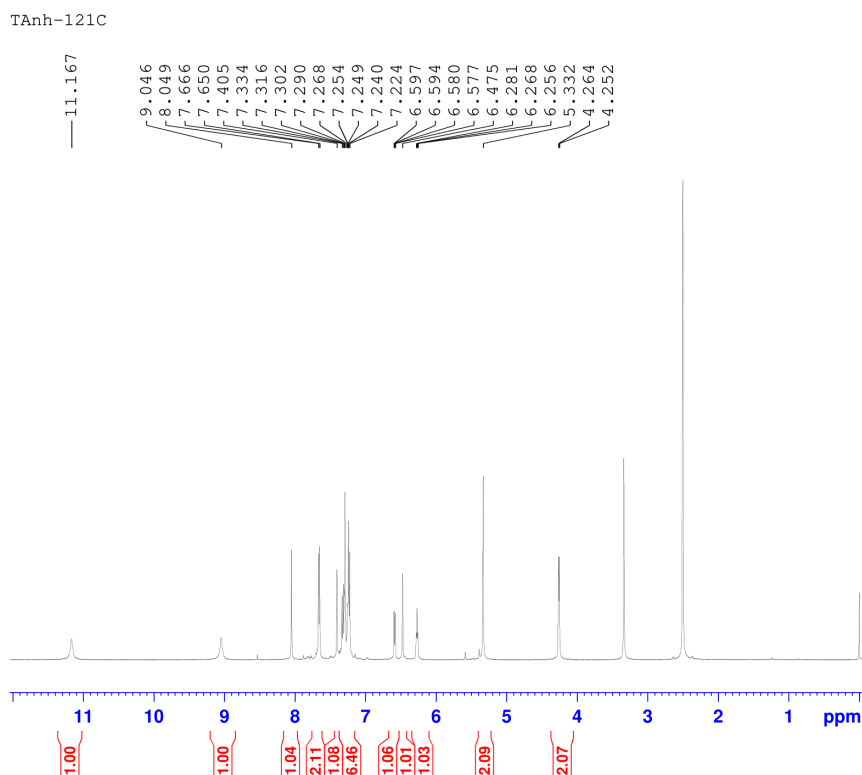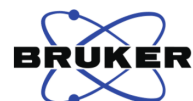

Current Data Parameters  
 NAME TAnh-121C  
 EXPNO 40  
 PROCNO 1

F2 - Acquisition Parameters  
 Date\_ 20220105  
 Time 8.11  
 INSTRUM spect  
 PROBHD 5 mm PABBO BB/  
 PULPROG zg30  
 TD 65536  
 SOLVENT DMSO  
 NS 16  
 DS 2  
 SWH 10000.000 Hz  
 FIDRES 0.152588 Hz  
 AQ 3.2767999 sec  
 RG 191.38  
 DW 50.000 usec  
 DE 6.50 usec  
 TE 297.0 K  
 D1 1.0000000 sec  
 TD0 1

===== CHANNEL f1 =====  
 SFO1 500.1330885 MHz  
 NUC1 1H  
 P1 9.80 usec  
 PLW1 24.0000000 W

F2 - Processing parameters  
 SI 65536  
 SF 500.1300052 MHz  
 WDW EM  
 SSB 0  
 LB 0.30 Hz  
 GB 0  
 PC 1.00

# <sup>13</sup>C NMR of compound 22c

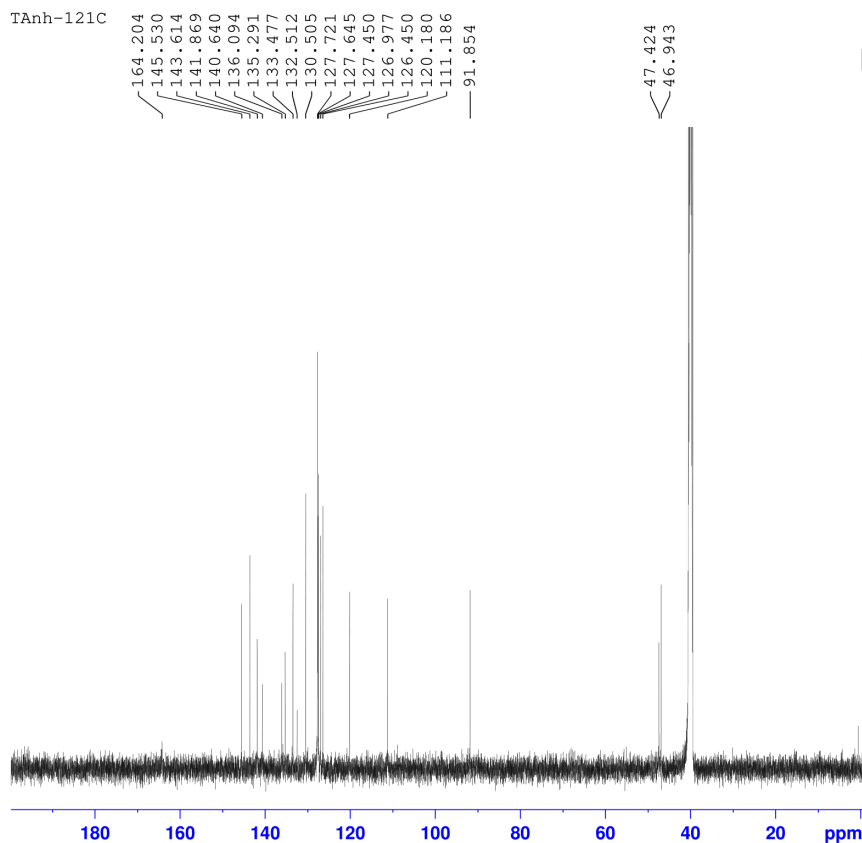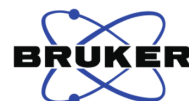

Current Data Parameters  
 NAME TAnh-121C  
 EXPNO 41  
 PROCNO 1

F2 - Acquisition Parameters  
 Date\_ 20220105  
 Time 10.30  
 INSTRUM spect  
 PROBHD 5 mm PABBO BB/  
 PULPROG zgpg30  
 TD 65536  
 SOLVENT DMSO  
 NS 1024  
 DS 4  
 SWH 31250.000 Hz  
 FIDRES 0.476837 Hz  
 AQ 1.0485760 sec  
 RG 191.38  
 DW 16.000 usec  
 DE 6.50 usec  
 TE 297.5 K  
 D1 2.0000000 sec  
 D11 0.0300000 sec  
 TD0 1

===== CHANNEL f1 =====  
 SFO1 125.7703637 MHz  
 NUC1 13C  
 P1 10.20 usec  
 PLW1 90.0000000 W

===== CHANNEL f2 =====  
 SFO2 500.1320005 MHz  
 NUC2 1H  
 CPDPRG[2] waltz16  
 PCPD2 80.00 usec  
 PLW2 24.0000000 W  
 PLW12 0.36015001 W  
 PLW13 0.23050000 W

F2 - Processing parameters  
 SI 65536  
 SF 125.7577885 MHz  
 WDW EM  
 SSB 0  
 LB 1.00 Hz  
 GB 0  
 PC 1.40

# <sup>1</sup>H NMR of compound 22d

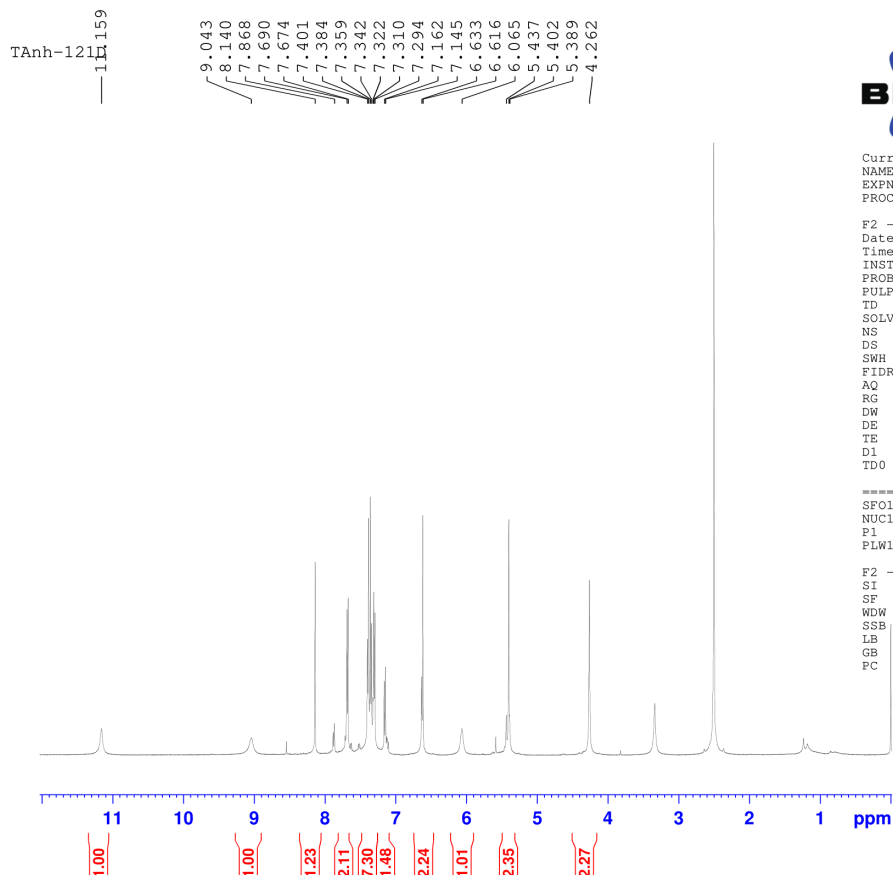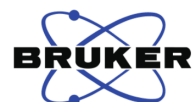

Current Data Parameters  
 NAME TAnh-121D  
 EXPNO 30  
 PROCNO 1

F2 - Acquisition Parameters  
 Date\_ 20211222  
 Time 8.40  
 INSTRUM spect  
 PROBHD 5 mm PABBO BB/  
 PULPROG zg30  
 TD 65536  
 SOLVENT DMSO  
 NS 16  
 DS 2  
 SWH 10000.000 Hz  
 FIDRES 0.152588 Hz  
 AQ 3.2767999 sec  
 RG 191.38  
 DW 50.000 usec  
 DE 6.50 usec  
 TE 296.7 K  
 D1 1.0000000 sec  
 TD0 1

----- CHANNEL f1 -----  
 SFO1 500.1330885 MHz  
 NUC1 1H  
 P1 9.80 usec  
 PLW1 24.0000000 W

F2 - Processing parameters  
 SI 65536  
 SF 500.1300045 MHz  
 WDW EM  
 SSB 0  
 LB 0.30 Hz  
 GB 0  
 PC 1.00

# <sup>13</sup>C NMR of compound 22d

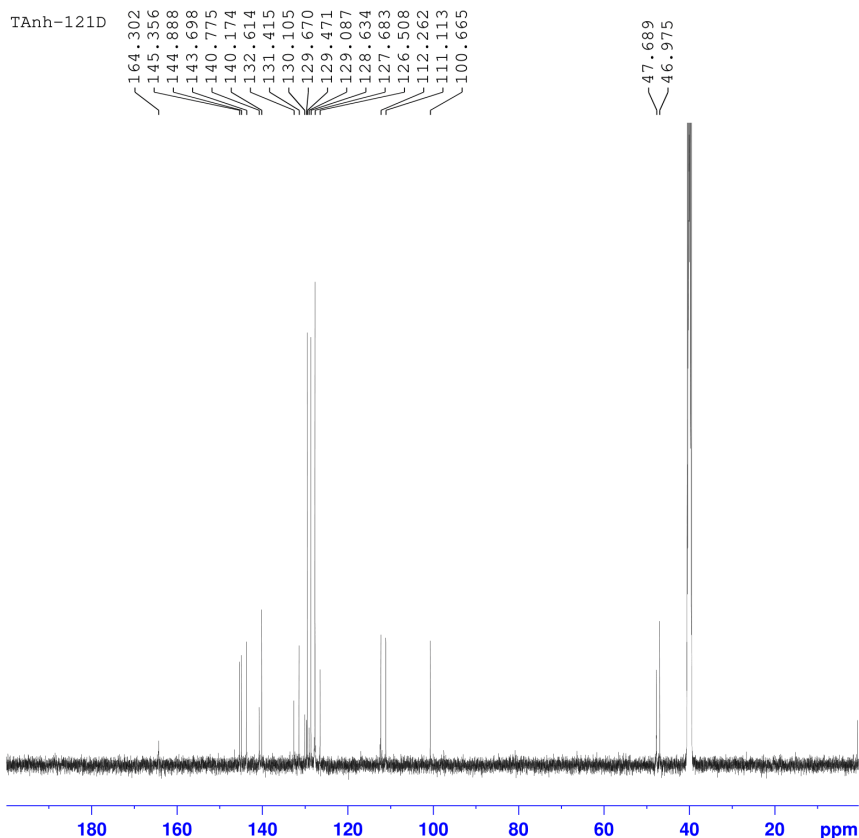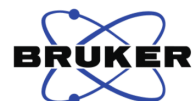

Current Data Parameters  
 NAME TAnh-121D  
 EXPNO 31  
 PROCNO 1

F2 - Acquisition Parameters  
 Date\_ 20211222  
 Time 12.57  
 INSTRUM spect  
 PROBHD 5 mm PABBO BB/  
 PULPROG zgpg30  
 TD 65536  
 SOLVENT DMSO  
 NS 2048  
 DS 4  
 SWH 31250.000 Hz  
 FIDRES 0.476837 Hz  
 AQ 1.0485760 sec  
 RG 191.38  
 DW 16.000 usec  
 DE 6.50 usec  
 TE 297.8 K  
 D1 2.0000000 sec  
 D11 0.0300000 sec  
 TD0 1

----- CHANNEL f1 -----  
 SFO1 125.7703637 MHz  
 NUC1 13C  
 P1 10.20 usec  
 PLW1 90.0000000 W

----- CHANNEL f2 -----  
 SFO2 500.1320005 MHz  
 NUC2 1H  
 CPDPRG[2] waltz16  
 PCPD2 80.00 usec  
 PLW2 24.0000000 W  
 PLW12 0.36015001 W  
 PLW13 0.23050000 W

F2 - Processing parameters  
 SI 65536  
 SF 125.7577885 MHz  
 WDW EM  
 SSB 0  
 LB 1.00 Hz  
 GB 0  
 PC 1.40



# <sup>1</sup>H NMR of compound 22e

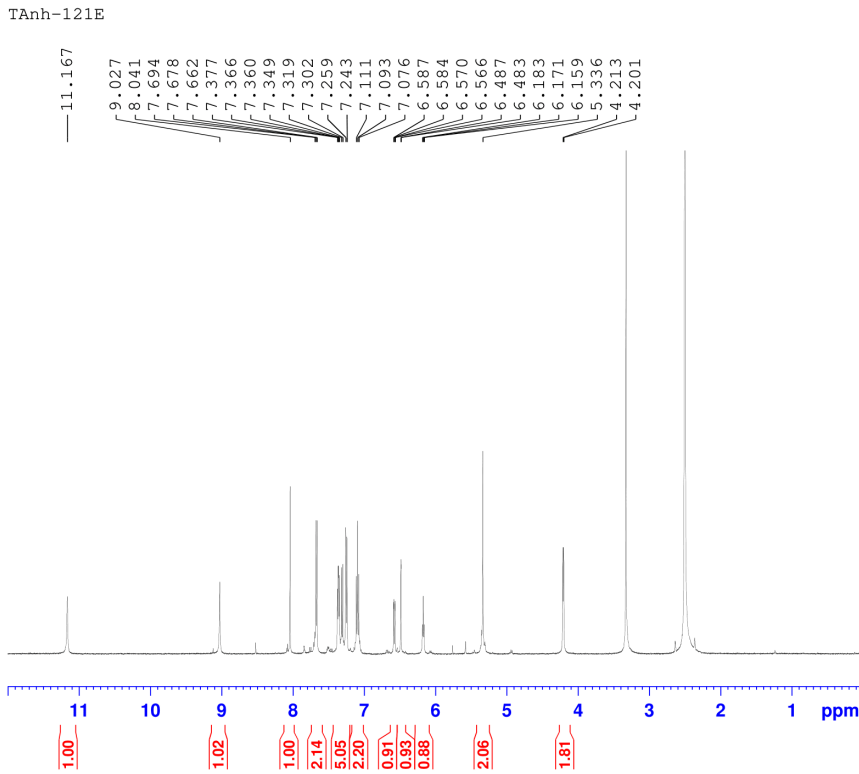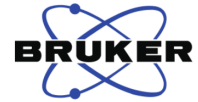

Current Data Parameters  
NAME TAnh-121E  
EXPNO 10  
PROCNO 1

F2 - Acquisition Parameters  
Date\_ 20220106  
Time 8.57  
INSTRUM spect  
PROBHD 5 mm PABBO BB/  
PULPROG zg30  
TD 65536  
SOLVENT DMSO  
NS 16  
DS 2  
SWH 10000.000 Hz  
FIDRES 0.152588 Hz  
AQ 3.2767999 sec  
RG 191.38  
DW 50.000 usec  
DE 6.50 usec  
TE 296.8 K  
D1 1.0000000 sec  
TD0 1

===== CHANNEL f1 =====  
SFO1 500.1330885 MHz  
NUC1 1H  
P1 9.80 usec  
PLW1 24.0000000 W

F2 - Processing parameters  
SI 65536  
SF 500.1300050 MHz  
WDW EM  
SSB 0  
LB 0.30 Hz  
GB 0  
PC 1.00

# <sup>13</sup>C NMR of compound 22e

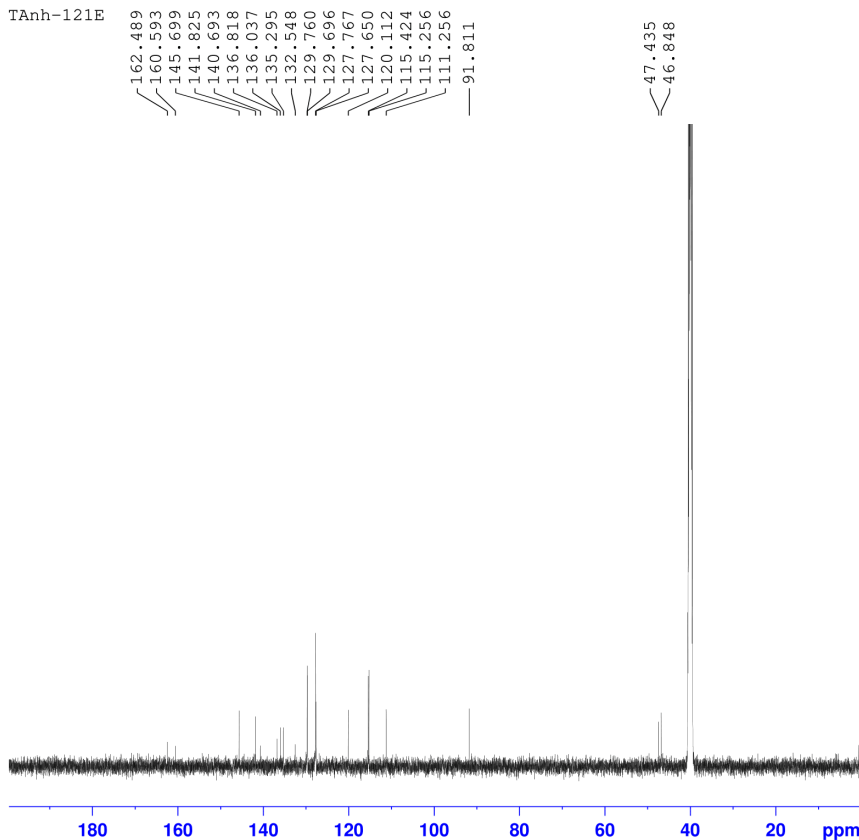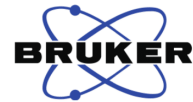

Current Data Parameters  
NAME TAnh-121E  
EXPNO 11  
PROCNO 1

F2 - Acquisition Parameters  
Date\_ 20220107  
Time 22.56  
INSTRUM spect  
PROBHD 5 mm PABBO BB/  
PULPROG zgpg30  
TD 65536  
SOLVENT DMSO  
NS 4096  
DS 4  
SWH 31250.000 Hz  
FIDRES 0.476837 Hz  
AQ 1.0485760 sec  
RG 191.38  
DW 16.000 usec  
DE 6.50 usec  
TE 298.0 K  
D1 2.0000000 sec  
D11 0.0300000 sec  
TD0 1

===== CHANNEL f1 =====  
SFO1 125.7703637 MHz  
NUC1 13C  
P1 10.20 usec  
PLW1 90.0000000 W

===== CHANNEL f2 =====  
SFO2 500.1320005 MHz  
NUC2 1H  
CPDPRG[2] waltz16  
PCPD2 80.00 usec  
PLW2 24.0000000 W  
PLW12 0.36015001 W  
PLW13 0.23050000 W

F2 - Processing parameters  
SI 65536  
SF 125.7577885 MHz  
WDW EM  
SSB 0  
LB 1.00 Hz  
GB 0  
PC 1.40

# <sup>1</sup>H NMR of compound 22f

TAnh-121F

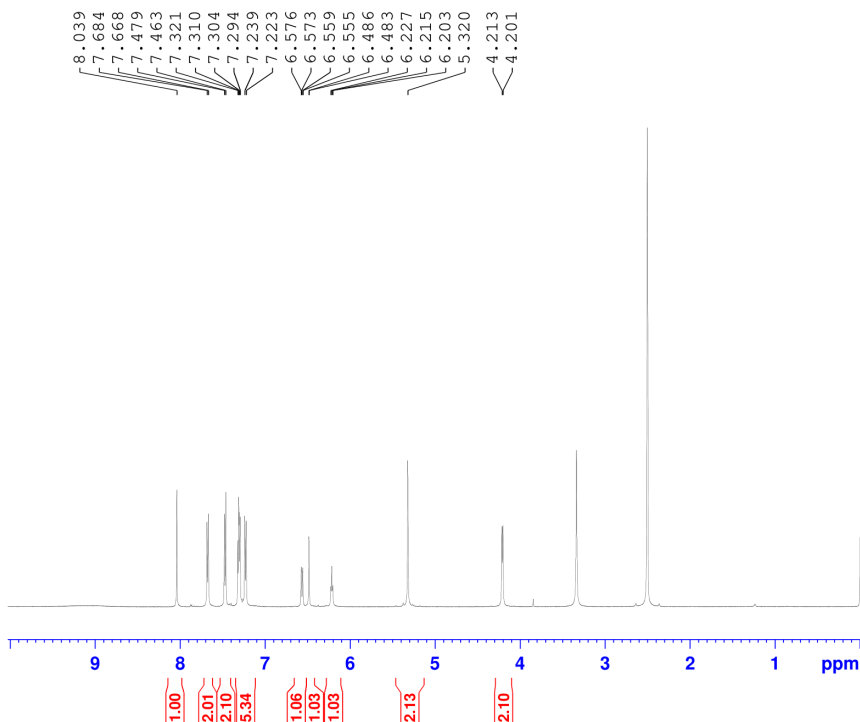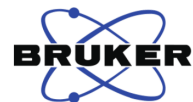

```

Current Data Parameters
NAME      TAnh-121F
EXPNO    51
PROCNO   1

F2 - Acquisition Parameters
Date_    20220105
Time     8.41
INSTRUM spect
PROBHD   5 mm PABBO BB/
PULPROG zg30
TD       65536
SOLVENT  DMSO
NS       16
DS       2
SWH      10000.000 Hz
FIDRES   0.152588 Hz
AQ       3.2767999 sec
RG       191.38
DW       50.000 usec
DE       6.50 usec
TE       296.7 K
D1       1.00000000 sec
TD0      1

===== CHANNEL f1 =====
SFO1    500.1330885 MHz
NUC1    1H
P1      9.80 usec
PLW1    24.00000000 W

F2 - Processing parameters
SI      65536
SF      500.130052 MHz
WDW     EM
SSB     0
LB      0.30 Hz
GB      0
PC      1.00
    
```

# <sup>13</sup>C NMR of compound 22f

TAnh-121F

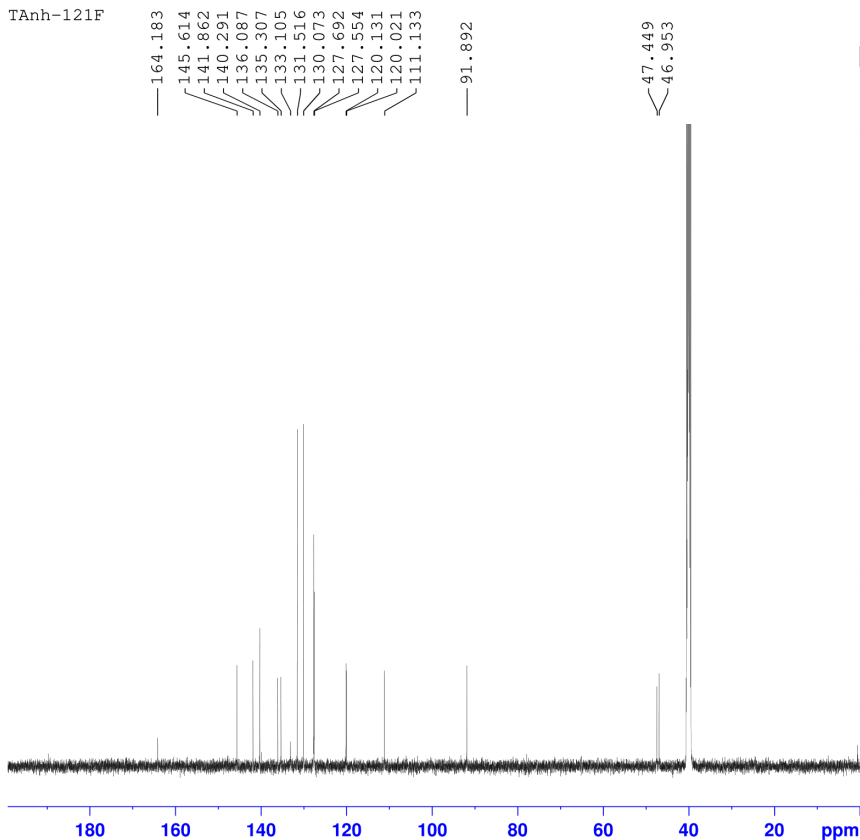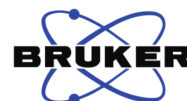

```

Current Data Parameters
NAME      TAnh-121F
EXPNO    52
PROCNO   1

F2 - Acquisition Parameters
Date_    20220105
Time     12.43
INSTRUM spect
PROBHD   5 mm PABBO BB/
PULPROG zgpg30
TD       65536
SOLVENT  DMSO
NS       1926
DS       4
SWH      31250.000 Hz
FIDRES   0.476837 Hz
AQ       1.0485760 sec
RG       191.38
DW       16.000 usec
DE       6.50 usec
TE       297.8 K
D1       2.00000000 sec
D11      0.03000000 sec
TD0      1

===== CHANNEL f1 =====
SFO1    125.7703637 MHz
NUC1    13C
P1      10.20 usec
PLW1    90.00000000 W

===== CHANNEL f2 =====
SFO2    500.1320005 MHz
NUC2    1H
CPDPRG[2] waltz16
PCPD2   80.00 usec
PLW2    24.00000000 W
PLW12   0.36015001 W
PLW13   0.23050000 W

F2 - Processing parameters
SI      65536
SF      125.7577885 MHz
WDW     EM
SSB     0
LB      1.00 Hz
GB      0
PC      1.40
    
```

# <sup>1</sup>H NMR of compound 22g

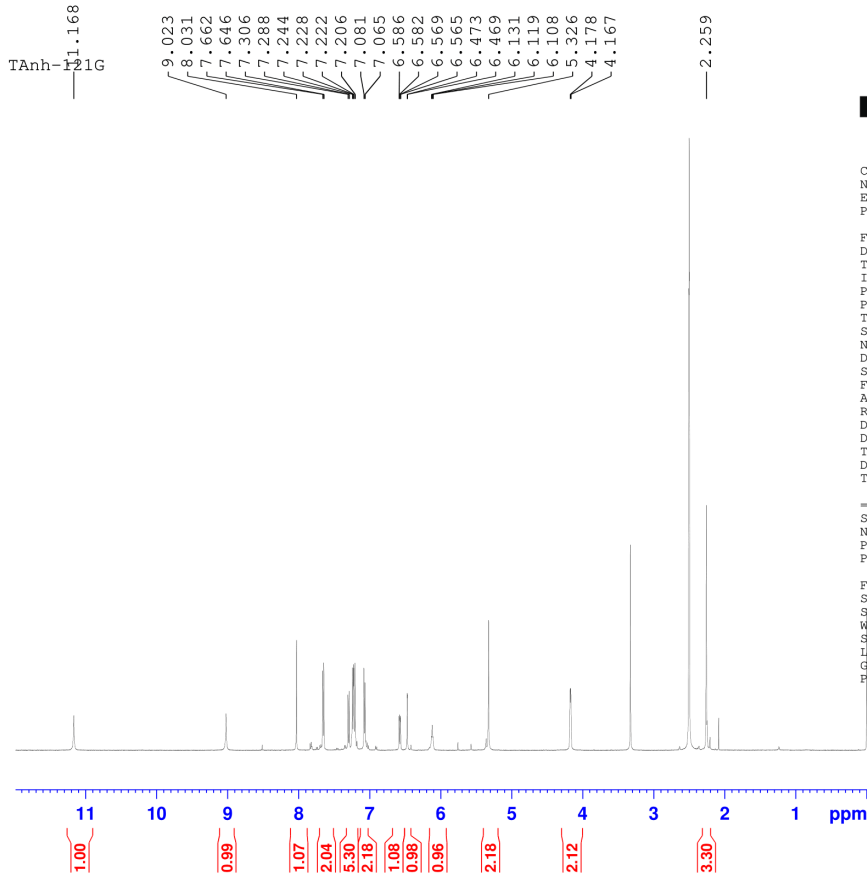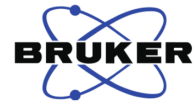

Current Data Parameters  
NAME TAnh-121G  
EXPNO 30  
PROCNO 1

F2 - Acquisition Parameters  
Date\_ 20211218  
Time 13.19  
INSTRUM spect  
PROBHD 5 mm PABBO BB/  
PULPROG zg30  
TD 65536  
SOLVENT DMSO  
NS 16  
DS 2  
SWH 10000.000 Hz  
FIDRES 0.152588 Hz  
AQ 3.2767999 sec  
RG 191.38  
DW 50.000 usec  
DE 6.50 usec  
TE 297.1 K  
D1 1.00000000 sec  
TD0 1

----- CHANNEL f1 -----  
SFO1 500.1330885 MHz  
NUC1 1H  
P1 9.80 usec  
PLW1 24.00000000 W

F2 - Processing parameters  
SI 65536  
SF 500.1300052 MHz  
WDW EM  
SSB 0  
LB 0.30 Hz  
GB 0  
HC 1.00

# <sup>13</sup>C NMR of compound 22g

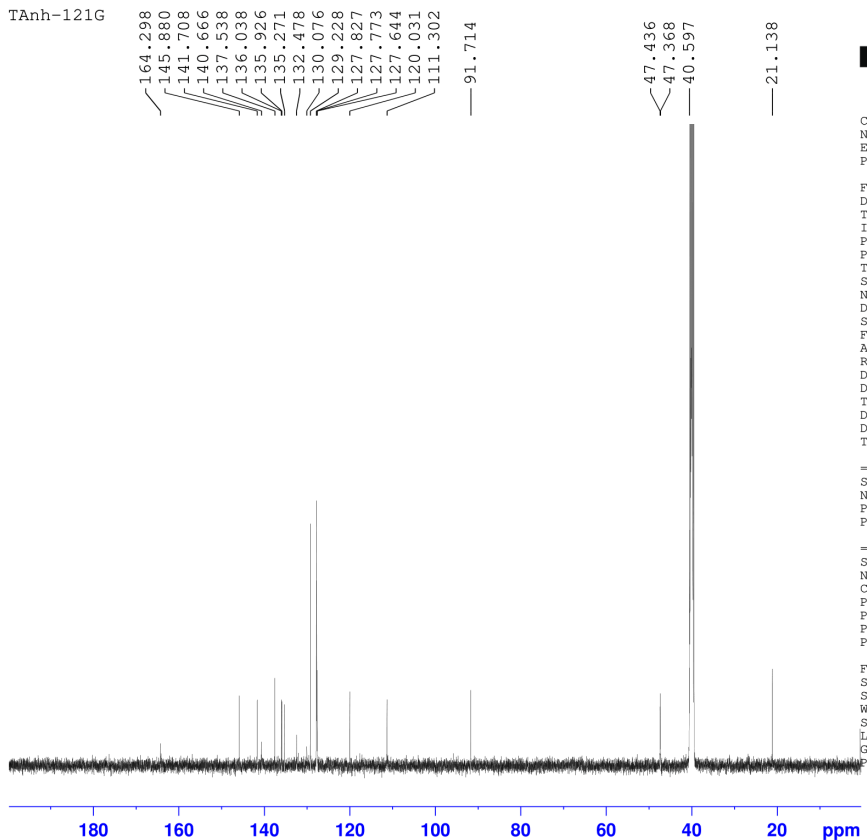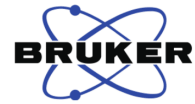

Current Data Parameters  
NAME TAnh-121G  
EXPNO 32  
PROCNO 1

F2 - Acquisition Parameters  
Date\_ 20211218  
Time 15.07  
INSTRUM spect  
PROBHD 5 mm PABBO BB/  
PULPROG zgpg30  
TD 65536  
SOLVENT DMSO  
NS 2048  
DS 4  
SWH 31250.000 Hz  
FIDRES 0.476837 Hz  
AQ 1.0485760 sec  
RG 191.38  
DW 16.000 usec  
DE 6.50 usec  
TE 297.9 K  
D1 2.00000000 sec  
D11 0.03000000 sec  
TD0 1

----- CHANNEL f1 -----  
SFO1 125.7703637 MHz  
NUC1 13C  
P1 10.20 usec  
PLW1 90.00000000 W

----- CHANNEL f2 -----  
SFO2 500.1320005 MHz  
NUC2 1H  
CPDPRG[2] waltz16  
PCPD2 80.00 usec  
PLW2 24.00000000 W  
PLW12 0.36015001 W  
PLW13 0.23050000 W

F2 - Processing parameters  
SI 65536  
SF 125.7577885 MHz  
WDW EM  
SSB 0  
LB 1.00 Hz  
GB 0  
PC 1.40

# <sup>1</sup>H NMR of compound 25a

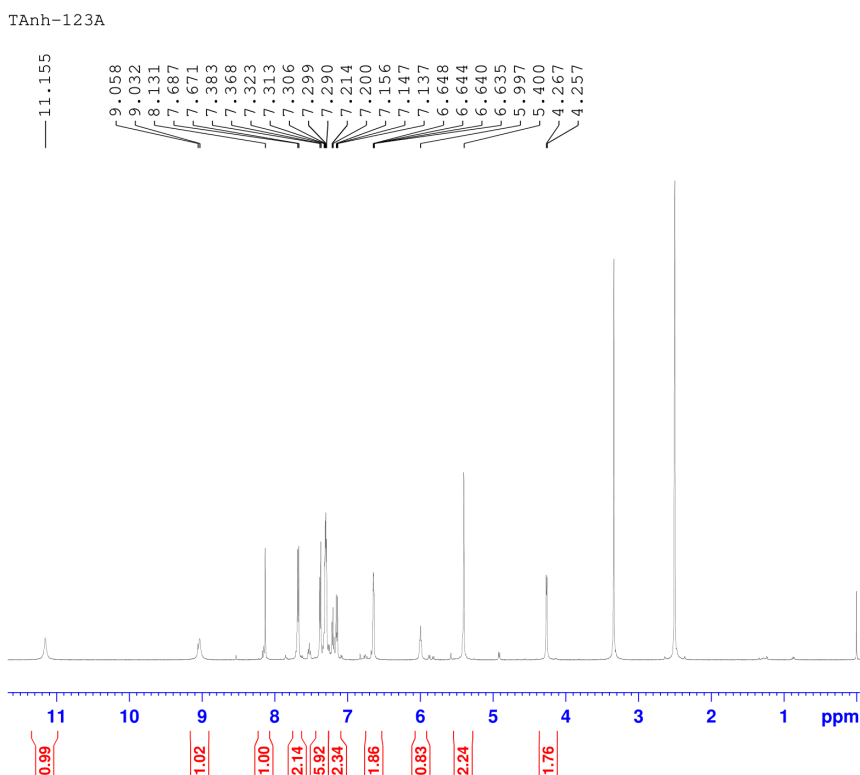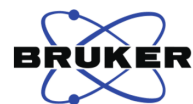

Current Data Parameters  
NAME TAnh-123A  
EXPNO 50  
PROCNO 1

F2 - Acquisition Parameters  
Date\_ 20220106  
Time 9.12  
INSTRUM spect  
PROBHD 5 mm PABBO BB/  
PULPROG zg30  
TD 65536  
SOLVENT DMSO  
NS 16  
DS 2  
SWH 10000.000 Hz  
FIDRES 0.152588 Hz  
AQ 3.2767999 sec  
RG 191.38  
DW 50.000 usec  
DE 6.50 usec  
TE 296.8 K  
D1 1.0000000 sec  
TD0 1

===== CHANNEL f1 =====  
SFO1 500.1330885 MHz  
NUC1 1H  
P1 9.80 usec  
PLW1 24.0000000 W

F2 - Processing parameters  
SI 65536  
SF 500.1300049 MHz  
WDW EM  
SSB 0  
LB 0.30 Hz  
GB 0  
PC 1.00

# <sup>13</sup>C NMR of compound 25a

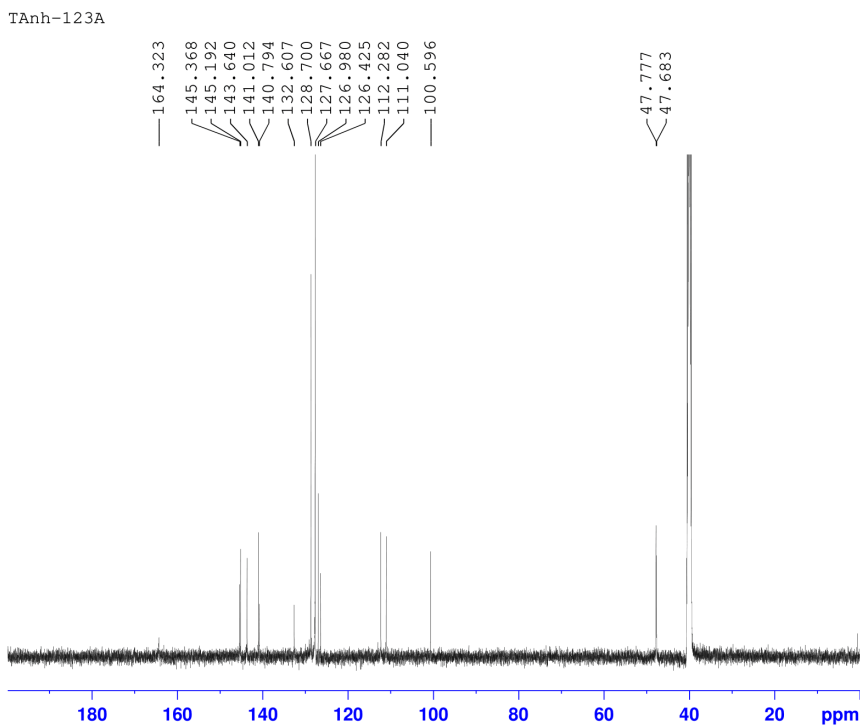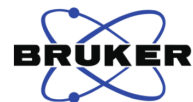

Current Data Parameters  
NAME TAnh-123A  
EXPNO 52  
PROCNO 1

F2 - Acquisition Parameters  
Date\_ 20220107  
Time 12.35  
INSTRUM spect  
PROBHD 5 mm PABBO BB/  
PULPROG zgpg30  
TD 65536  
SOLVENT DMSO  
NS 1689  
DS 4  
SWH 31250.000 Hz  
FIDRES 0.476837 Hz  
AQ 1.0485760 sec  
RG 191.38  
DW 16.000 usec  
DE 6.50 usec  
TE 297.5 K  
D1 2.0000000 sec  
D11 0.0300000 sec  
TD0 1

===== CHANNEL f1 =====  
SFO1 125.7703637 MHz  
NUC1 13C  
P1 10.20 usec  
PLW1 90.0000000 W

===== CHANNEL f2 =====  
SFO2 500.1320005 MHz  
NUC2 1H  
CPDPRG2 waltz16  
PCPD2 80.00 usec  
PLW2 24.0000000 W  
PLW12 0.36015001 W  
PLW13 0.23050000 W

F2 - Processing parameters  
SI 65536  
SF 125.7577885 MHz  
WDW EM  
SSB 0  
LB 1.00 Hz  
GB 0  
PC 1.40

**<sup>1</sup>H NMR of compound 25b**

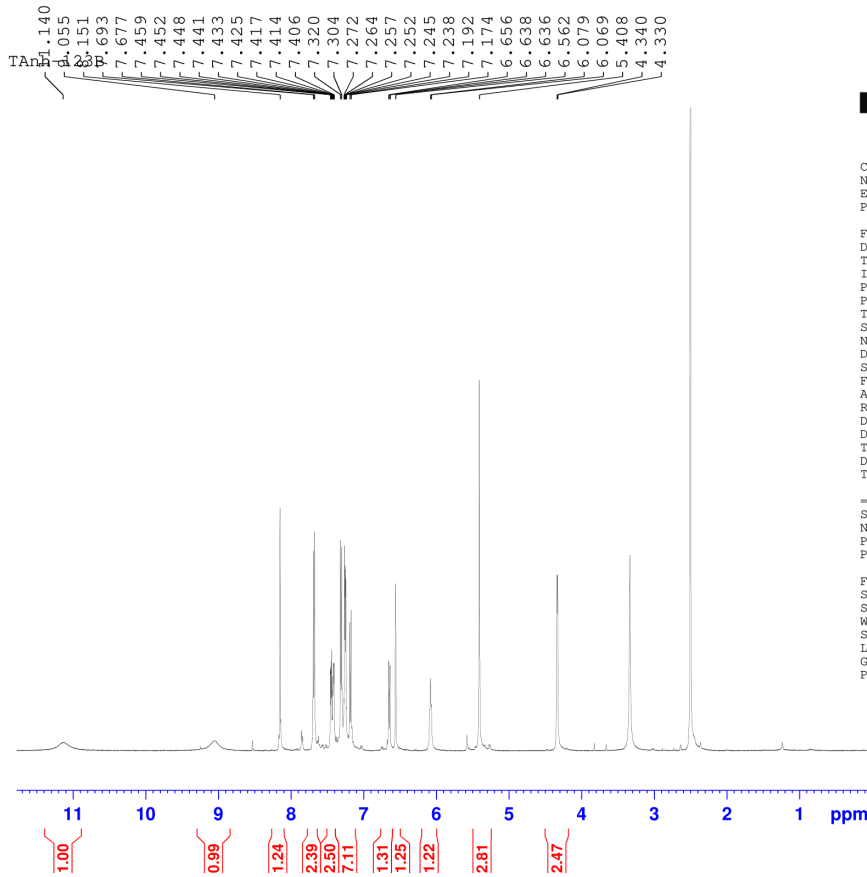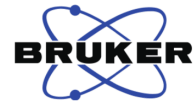

Current Data Parameters  
 NAME Tanh-123B  
 EXPNO 20  
 PROCNO 1

F2 - Acquisition Parameters  
 Date\_ 20211214  
 Time 15.23  
 INSTRUM spect  
 PROBHD 5 mm PABBO BB/  
 PULPROG zg30  
 TD 65536  
 SOLVENT DMSO  
 NS 8  
 DS 2  
 SWH 10000.000 Hz  
 FIDRES 0.152588 Hz  
 AQ 3.2767999 sec  
 RG 191.38  
 DW 50.000 usec  
 DE 6.50 usec  
 TE 297.0 K  
 D1 1.0000000 sec  
 TD0 1

----- CHANNEL f1 -----  
 SFO1 500.1330885 MHz  
 NUC1 1H  
 P1 9.80 usec  
 PLW1 24.0000000 W

F2 - Processing parameters  
 SI 65536  
 SF 500.1300043 MHz  
 WDW EM  
 SSB 0  
 LB 0.30 Hz  
 GB 0  
 PC 1.00

**<sup>13</sup>C NMR of compound 25b**

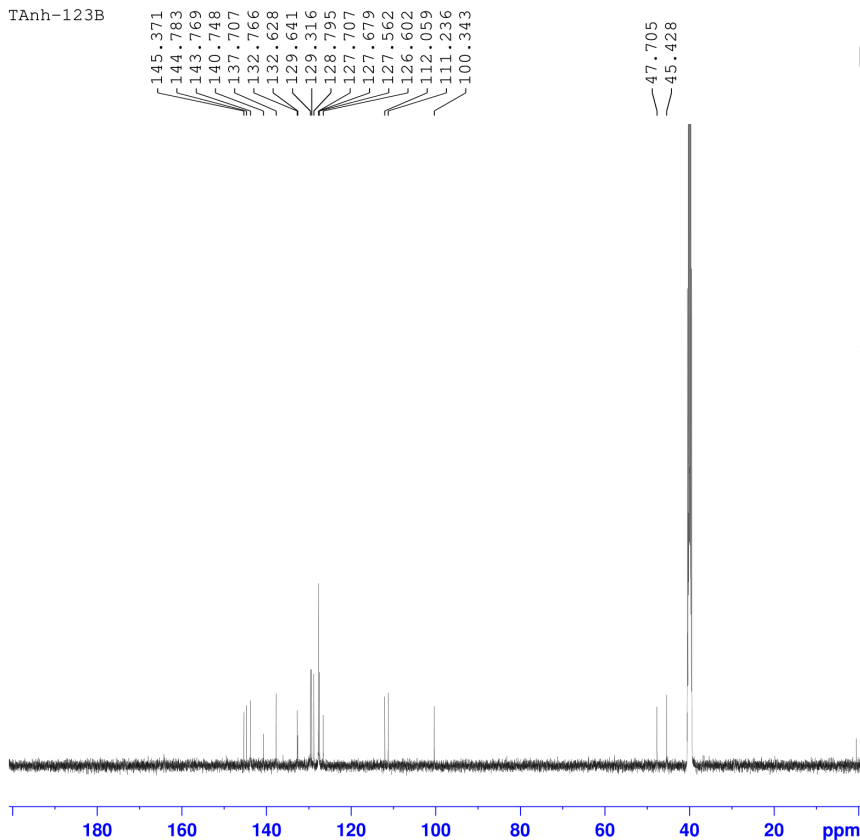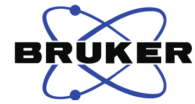

Current Data Parameters  
 NAME Tanh-123B  
 EXPNO 21  
 PROCNO 1

F2 - Acquisition Parameters  
 Date\_ 20211215  
 Time 10.31  
 INSTRUM spect  
 PROBHD 5 mm PABBO BB/  
 PULPROG zgpg30  
 TD 65536  
 SOLVENT DMSO  
 NS 1180  
 DS 4  
 SWH 31250.000 Hz  
 FIDRES 0.476837 Hz  
 AQ 1.0485760 sec  
 RG 191.38  
 DW 16.000 usec  
 DE 6.50 usec  
 TE 297.5 K  
 D1 2.0000000 sec  
 D11 0.0300000 sec  
 TD0 1

----- CHANNEL f1 -----  
 SFO1 125.7703637 MHz  
 NUC1 13C  
 P1 10.20 usec  
 PLW1 90.0000000 W

----- CHANNEL f2 -----  
 SFO2 500.1320005 MHz  
 NUC2 1H  
 CPDPRG[2] waltz16  
 PCPD2 80.00 usec  
 PLW2 24.0000000 W  
 PLW12 0.36015001 W  
 PLW13 0.23050000 W

F2 - Processing parameters  
 SI 65536  
 SF 125.7577885 MHz  
 WDW EM  
 SSB 0  
 LB 1.00 Hz  
 GB 0  
 PC 1.40

<sup>1</sup>H NMR of compound 25c

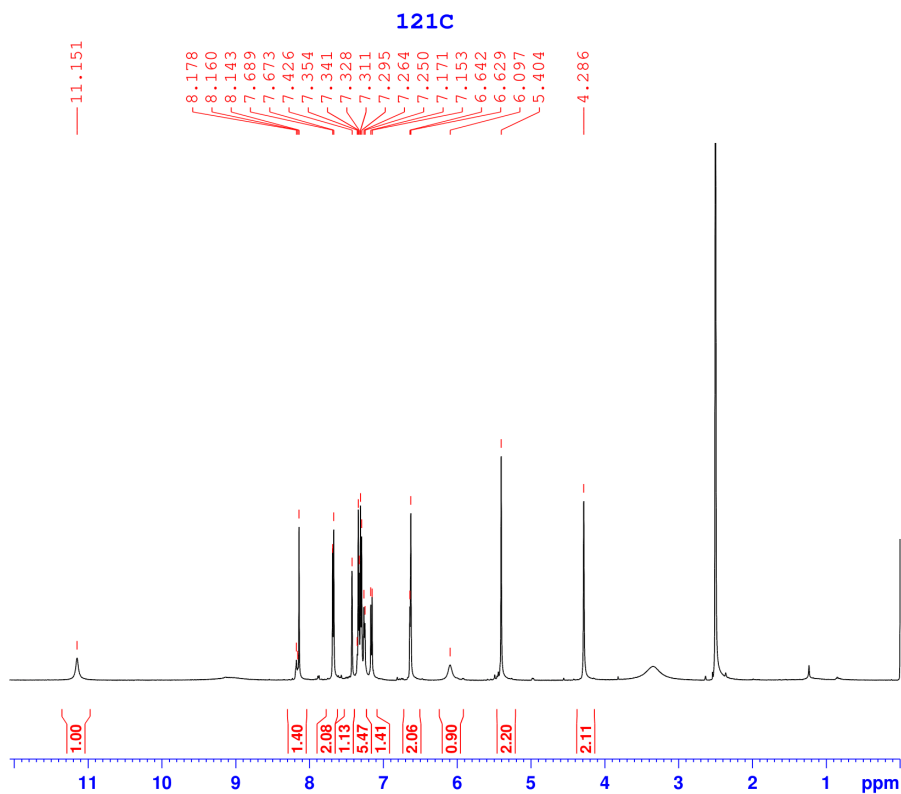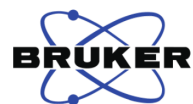

Current Data Parameters  
 NAME Tanh-121C  
 EXPNO 20  
 PROCNO 1

F2 - Acquisition Parameters  
 Date\_ 20211210  
 Time 17.15  
 INSTRUM spect  
 PROBHD 5 mm PABBO BB/  
 PULPROG zg30  
 TD 65536  
 SOLVENT DMSO  
 NS 16  
 DS 2  
 SWH 10000.000 Hz  
 FIDRES 0.152588 Hz  
 AQ 3.2767999 sec  
 RG 191.38  
 DW 50.000 usec  
 DE 6.50 usec  
 TE 296.9 K  
 D1 1.00000000 sec  
 TD0 1

===== CHANNEL f1 =====  
 SF01 500.1330885 MHz  
 NUC1 1H  
 P1 9.80 usec  
 PLW1 24.00000000 W

F2 - Processing parameters  
 SI 65536  
 SF 500.130044 MHz  
 WDW EM  
 SSB 0  
 LB 0.30 Hz  
 GB 0  
 PC 1.00

<sup>13</sup>C NMR of compound 25c

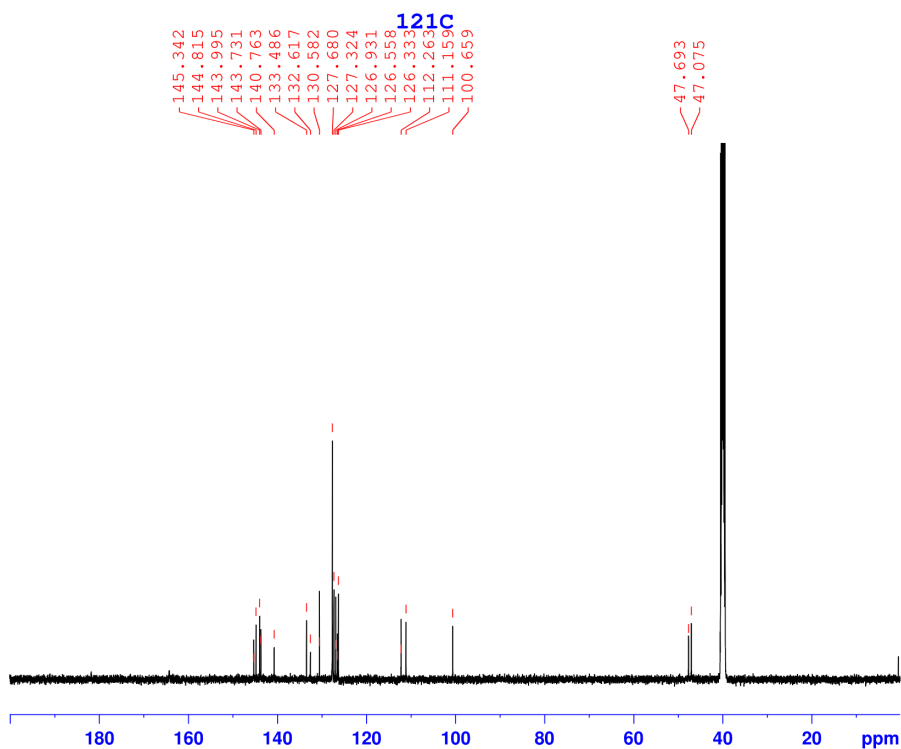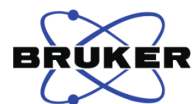

Current Data Parameters  
 NAME Tanh-121C  
 EXPNO 21  
 PROCNO 1

F2 - Acquisition Parameters  
 Date\_ 20211211  
 Time 13.38  
 INSTRUM spect  
 PROBHD 5 mm PABBO BB/  
 PULPROG zgpg30  
 TD 65536  
 SOLVENT DMSO  
 NS 2048  
 DS 4  
 SWH 31250.000 Hz  
 FIDRES 0.476837 Hz  
 AQ 1.0485760 sec  
 RG 191.38  
 DW 16.000 usec  
 DE 6.50 usec  
 TE 298.0 K  
 D1 2.00000000 sec  
 D11 0.03000000 sec  
 TD0 1

===== CHANNEL f1 =====  
 SF01 125.7703637 MHz  
 NUC1 13C  
 P1 10.20 usec  
 PLW1 90.00000000 W

===== CHANNEL f2 =====  
 SFO2 500.1320005 MHz  
 NUC2 1H  
 CPDPRG2 waltz16  
 PCPD2 80.00 usec  
 PLW2 24.00000000 W  
 PLW12 0.36015001 W  
 PLW13 0.23050000 W

F2 - Processing parameters  
 SI 65536  
 SF 125.7577885 MHz  
 WDW EM  
 SSB 0  
 LB 1.00 Hz  
 GB 0  
 PC 1.40

# <sup>1</sup>H NMR of compound 25d

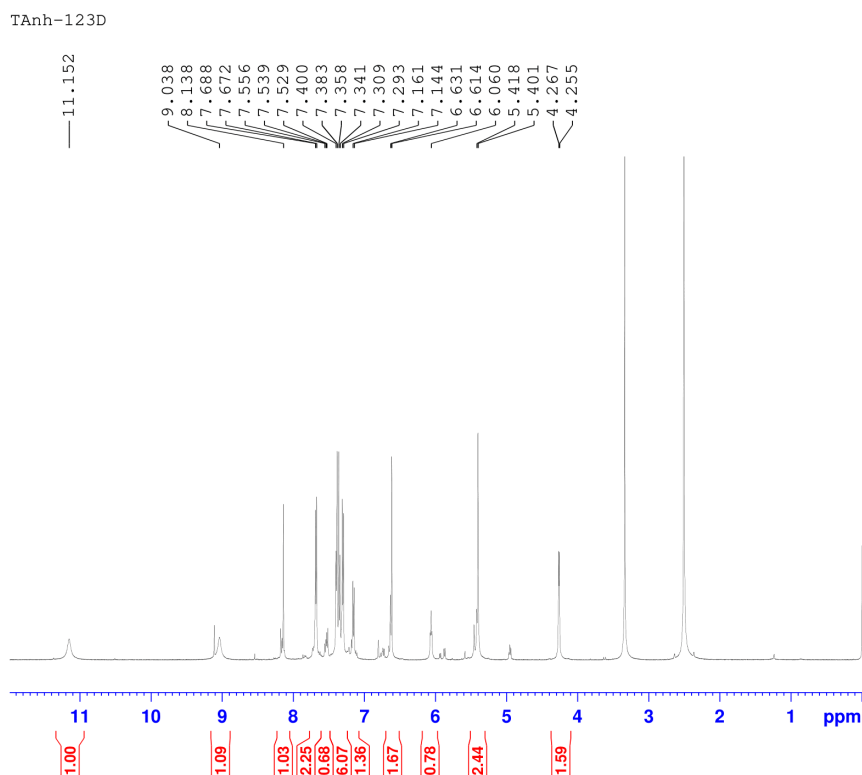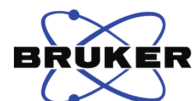

Current Data Parameters  
 NAME TAnh-123D  
 EXPNO 30  
 PROCNO 1

F2 - Acquisition Parameters  
 Date\_ 20220106  
 Time 9.05  
 INSTRUM spect  
 PROBHD 5 mm PABBO BB/  
 PULPROG zg30  
 TD 65536  
 SOLVENT DMSO  
 NS 16  
 DS 2  
 SWH 10000.000 Hz  
 FIDRES 0.152588 Hz  
 AQ 3.2767999 sec  
 RG 191.38  
 DW 50.000 usec  
 DE 6.50 usec  
 TE 296.8 K  
 D1 1.0000000 sec  
 TDO 1

===== CHANNEL f1 =====  
 SFO1 500.1330885 MHz  
 NUC1 1H  
 P1 9.80 usec  
 PLW1 24.0000000 W

F2 - Processing parameters  
 SI 65536  
 SF 500.1300046 MHz  
 WF EM  
 SSB 0  
 LB 0.30 Hz  
 GB 0  
 PC 1.00

# <sup>13</sup>C NMR of compound 25d

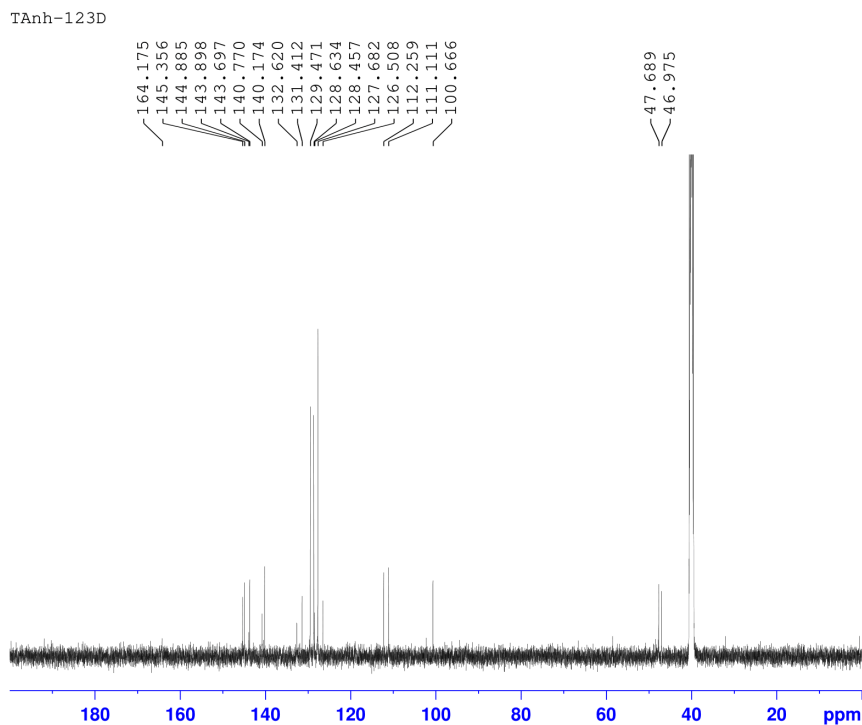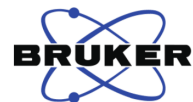

Current Data Parameters  
 NAME TAnh-123D  
 EXPNO 31  
 PROCNO 1

F2 - Acquisition Parameters  
 Date\_ 20220106  
 Time 13.08  
 INSTRUM spect  
 PROBHD 5 mm PABBO BB/  
 PULPROG zgpg30  
 TD 65536  
 SOLVENT DMSO  
 NS 1024  
 DS 4  
 SWH 31250.000 Hz  
 FIDRES 0.476837 Hz  
 AQ 1.0485760 sec  
 RG 191.38  
 DW 16.000 usec  
 DE 6.50 usec  
 TE 297.8 K  
 D1 2.0000000 sec  
 D11 0.0300000 sec  
 TDO 1

===== CHANNEL f1 =====  
 SFO1 125.7703637 MHz  
 NUC1 13C  
 P1 10.20 usec  
 PLW1 90.0000000 W

===== CHANNEL f2 =====  
 SFO2 500.1320005 MHz  
 NUC2 1H  
 CPDPRG2 waltz16  
 PCPD2 80.00 usec  
 PLW2 24.0000000 W  
 PLW12 0.36015001 W  
 PLW13 0.23050000 W

F2 - Processing parameters  
 SI 65536  
 SF 125.7577885 MHz  
 WF EM  
 SSB 0  
 LB 1.00 Hz  
 GB 0  
 PC 1.40

# <sup>1</sup>H NMR of compound 25e

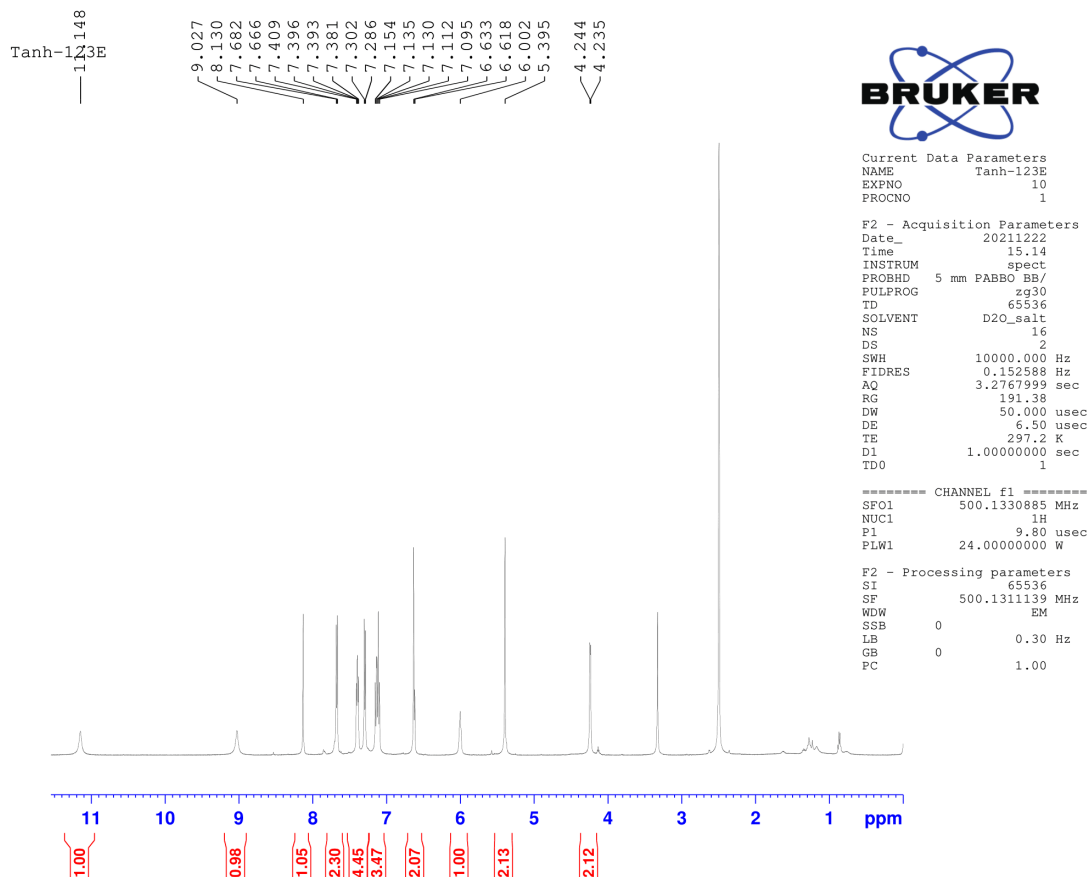

# <sup>13</sup>C NMR of compound 25e

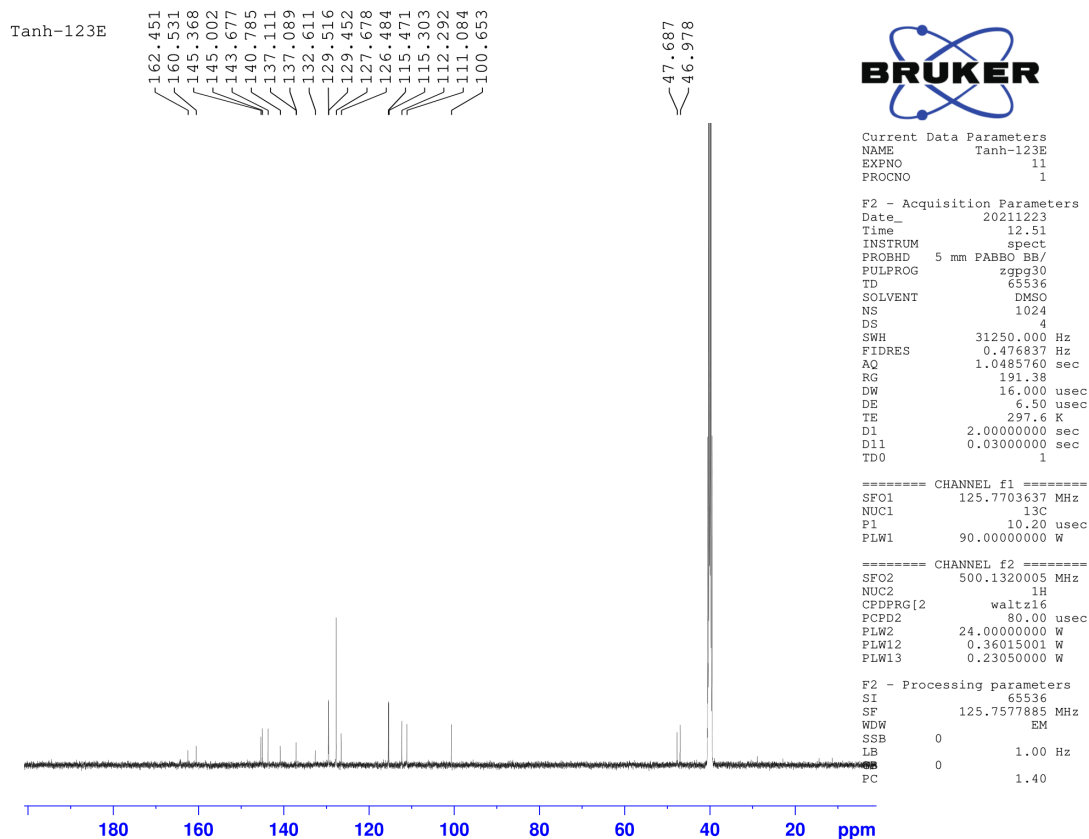



# <sup>1</sup>H NMR of compound 25f

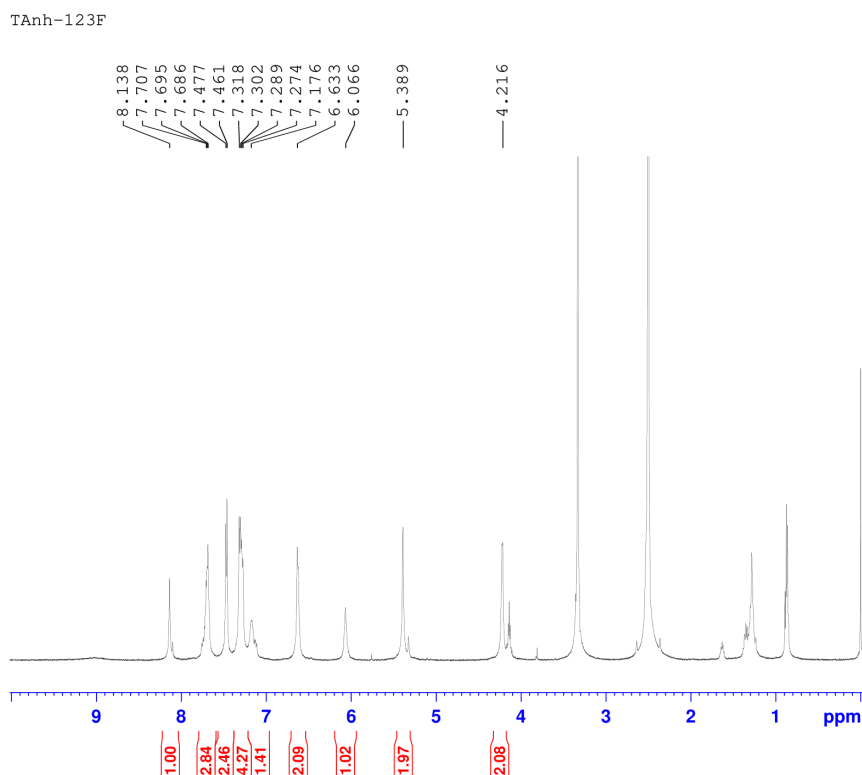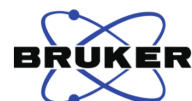

Current Data Parameters  
NAME TAnh-123F  
EXPNO 40  
PROCNO 1

F2 - Acquisition Parameters  
Date\_ 20220106  
Time 9.08  
INSTRUM spect  
PROBHD 5 mm PABBO BB/  
PULPROG zg30  
TD 65536  
SOLVENT DMSO  
NS 16  
DS 2  
SWH 10000.000 Hz  
FIDRES 0.152588 Hz  
AQ 3.2767999 sec  
RG 191.38  
DW 50.000 usec  
DE 6.50 usec  
TE 296.9 K  
D1 1.0000000 sec  
TDO 1

===== CHANNEL f1 =====  
SFO1 500.1330885 MHz  
NUC1 1H  
P1 9.80 usec  
PLW1 24.0000000 W

F2 - Processing parameters  
SI 65536  
SF 500.1300047 MHz  
WDW EM  
SSB 0  
LB 0.30 Hz  
GB 0  
PC 1.00

# <sup>13</sup>C NMR of compound 25f

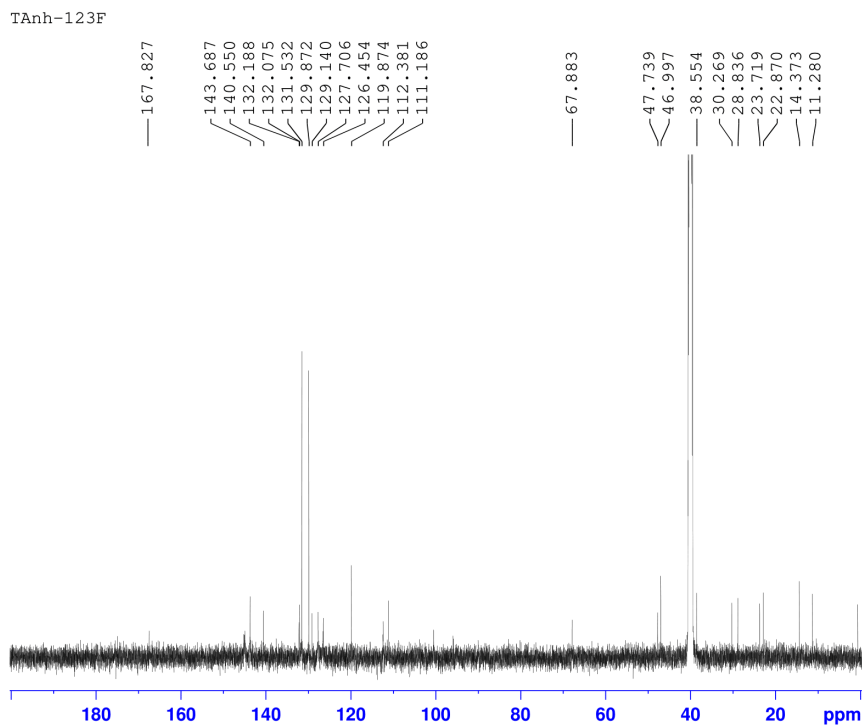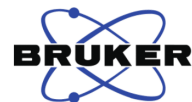

Current Data Parameters  
NAME TAnh-123F  
EXPNO 42  
PROCNO 1

F2 - Acquisition Parameters  
Date\_ 20220107  
Time 15.42  
INSTRUM spect  
PROBHD 5 mm PABBO BB/  
PULPROG zgpg30  
TD 65536  
SOLVENT DMSO  
NS 3072  
DS 4  
SWH 31250.000 Hz  
FIDRES 0.476837 Hz  
AQ 1.0485760 sec  
RG 191.38  
DW 16.000 usec  
DE 6.50 usec  
TE 297.7 K  
D1 2.0000000 sec  
D11 0.0300000 sec  
TDO 1

===== CHANNEL f1 =====  
SFO1 125.7703637 MHz  
NUC1 13C  
P1 10.20 usec  
PLW1 90.0000000 W

===== CHANNEL f2 =====  
SFO2 500.1320005 MHz  
NUC2 1H  
CPDPRG2 waltz16  
PCPD2 80.00 usec  
PLW2 24.0000000 W  
PLW12 0.36015001 W  
PLW13 0.23050000 W

F2 - Processing parameters  
SI 65536  
SF 125.7577885 MHz  
WDW EM  
SSB 0  
LB 1.00 Hz  
GB 0  
PC 1.40

**<sup>1</sup>H NMR of compound 25g**

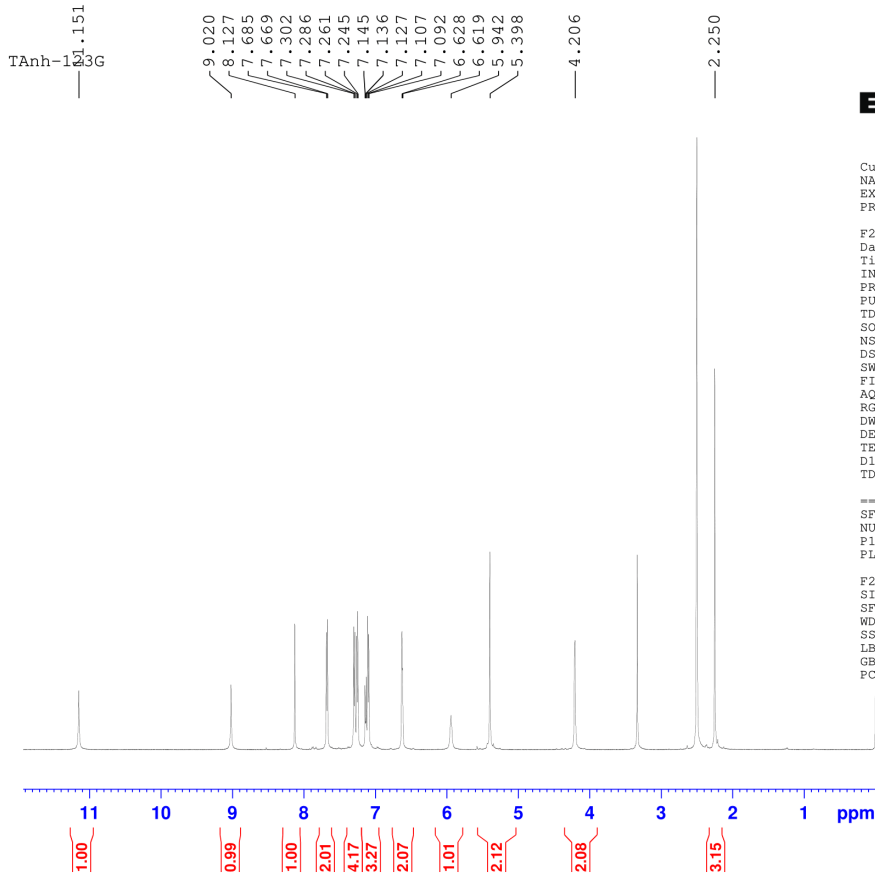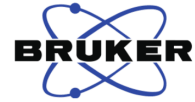

Current Data Parameters  
 NAME TAnh-123G  
 EXPNO 40  
 PROCNO 1

F2 - Acquisition Parameters  
 Date\_ 20211222  
 Time 8.44  
 INSTRUM spect  
 PROBHD 5 mm PABBO BB/  
 PULPROG zg30  
 TD 65536  
 SOLVENT DMSO  
 NS 16  
 DS 2  
 SWH 10000.000 Hz  
 FIDRES 0.152588 Hz  
 AQ 3.2767999 sec  
 RG 191.38  
 DW 50.000 usec  
 DE 6.50 usec  
 TE 296.8 K  
 D1 1.0000000 sec  
 TD0 1

----- CHANNEL f1 -----  
 SFO1 500.1330885 MHz  
 NUC1 1H  
 P1 9.80 usec  
 PLW1 24.0000000 W

F2 - Processing parameters  
 SI 65536  
 SF 500.1300058 MHz  
 WDW EM  
 SSB 0  
 LB 0.30 Hz  
 GB 0  
 PC 1.00

**<sup>13</sup>C NMR of compound 25g**

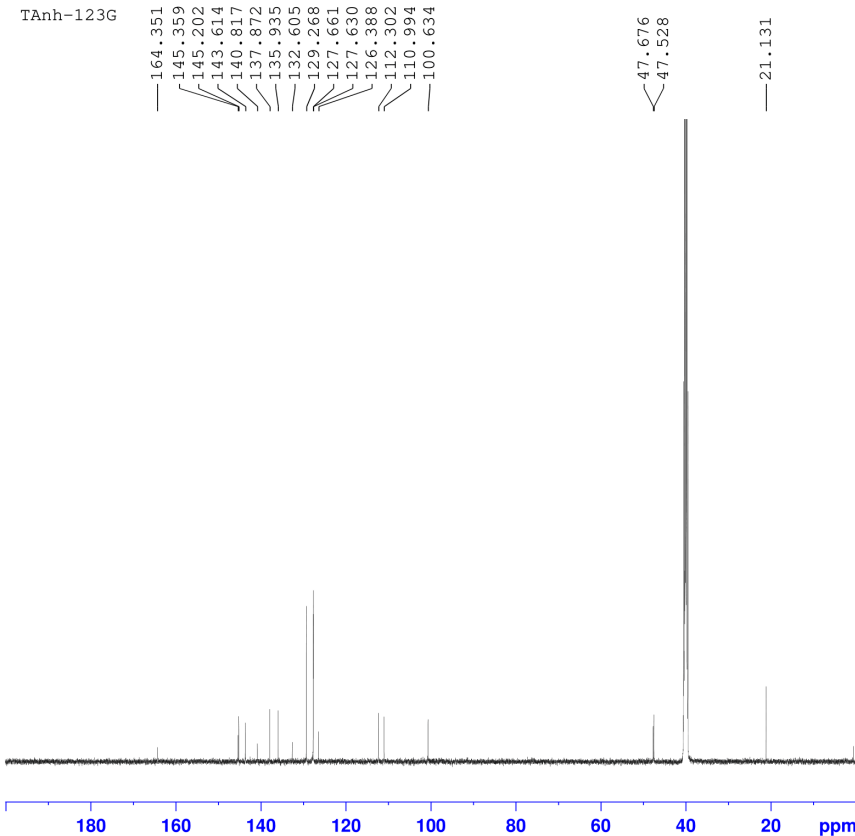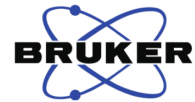

Current Data Parameters  
 NAME TAnh-123G  
 EXPNO 41  
 PROCNO 1

F2 - Acquisition Parameters  
 Date\_ 20211222  
 Time 9.56  
 INSTRUM spect  
 PROBHD 5 mm PABBO BB/  
 PULPROG zgpg30  
 TD 65536  
 SOLVENT DMSO  
 NS 2048  
 DS 4  
 SWH 31250.000 Hz  
 FIDRES 0.476837 Hz  
 AQ 1.0485760 sec  
 RG 191.38  
 DW 16.000 usec  
 DE 6.50 usec  
 TE 297.5 K  
 D1 2.0000000 sec  
 D11 0.0300000 sec  
 TD0 1

----- CHANNEL f1 -----  
 SFO1 125.7703637 MHz  
 NUC1 13C  
 P1 10.20 usec  
 PLW1 90.0000000 W

----- CHANNEL f2 -----  
 SFO2 500.1320005 MHz  
 NUC2 1H  
 CPDPRG[2] waltz16  
 PCPD2 80.00 usec  
 PLW2 24.0000000 W  
 PLW12 0.36015001 W  
 PLW13 0.23050000 W

F2 - Processing parameters  
 SI 65536  
 SF 125.7577885 MHz  
 WDW EM  
 SSB 0  
 LB 1.00 Hz  
 GB 0  
 PC 1.40

# <sup>1</sup>H NMR of compound 27a

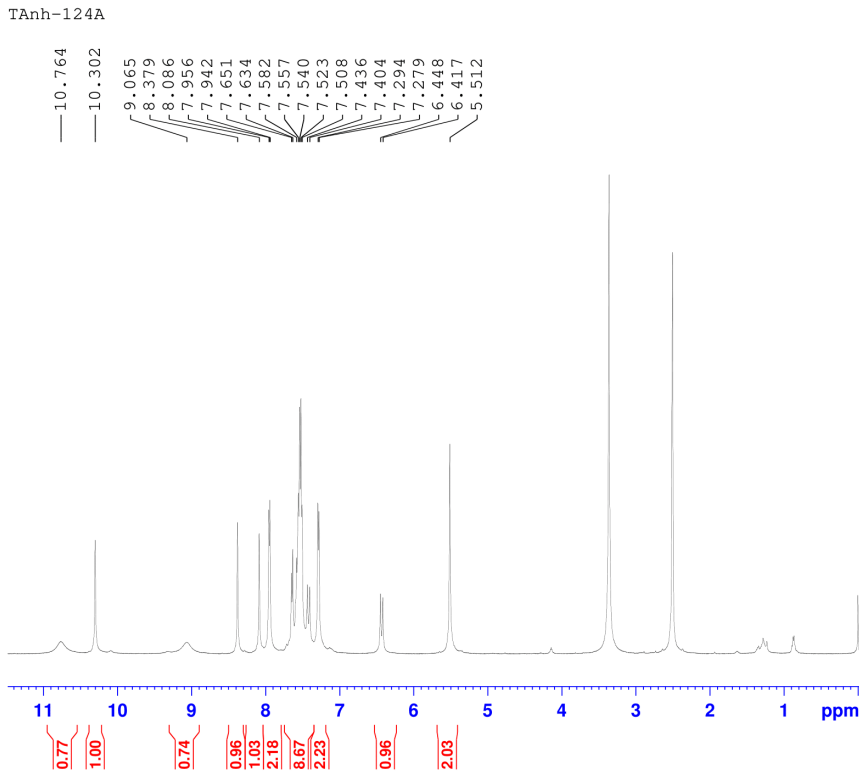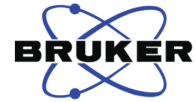

Current Data Parameters  
NAME TAnh-124A  
EXPNO 10  
PROCNO 1

F2 - Acquisition Parameters  
Date\_ 20220117  
Time 18.08  
INSTRUM spect  
PROBHD 5 mm PABBO BB/  
PULPROG zg30  
TD 65536  
SOLVENT DMSO  
NS 16  
DS 2  
SWH 10000.000 Hz  
FIDRES 0.152588 Hz  
AQ 3.2767999 sec  
RG 191.38  
DW 50.000 usec  
DE 6.50 usec  
TE 296.8 K  
D1 1.0000000 sec  
TD0 1

===== CHANNEL f1 =====  
SFO1 500.1330885 MHz  
NUC1 1H  
P1 9.80 usec  
PLW1 24.0000000 W

F2 - Processing parameters  
SI 65536  
SF 500.1300038 MHz  
WDW EM  
SSB 0  
LB 0.30 Hz  
GB 0  
PC 1.00

# <sup>13</sup>C NMR of compound 27a

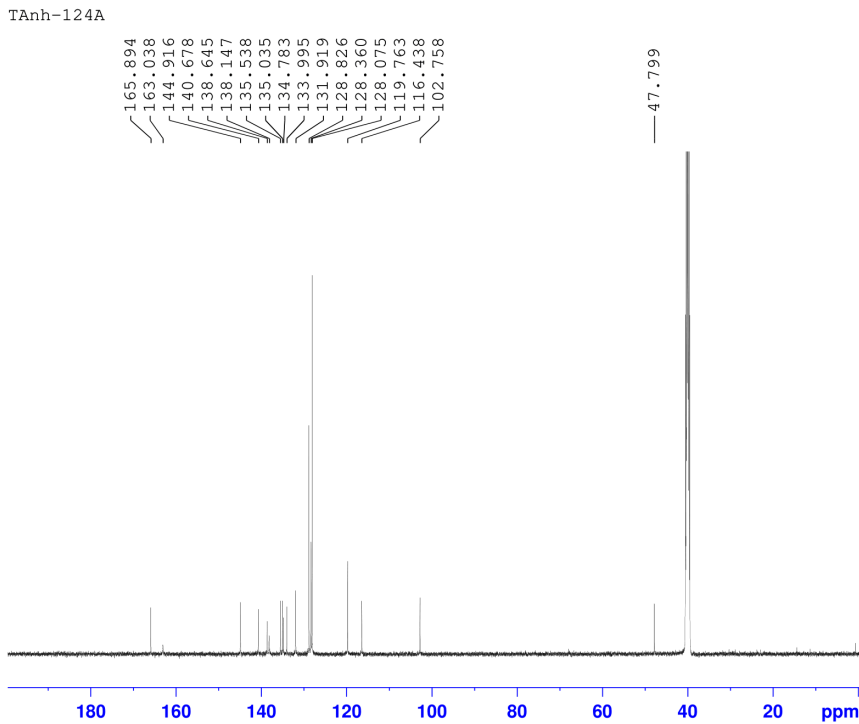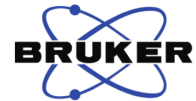

Current Data Parameters  
NAME TAnh-124A  
EXPNO 11  
PROCNO 1

F2 - Acquisition Parameters  
Date\_ 20220117  
Time 20.49  
INSTRUM spect  
PROBHD 5 mm PABBO BB/  
PULPROG zgpg30  
TD 65536  
SOLVENT DMSO  
NS 3072  
DS 4  
SWH 31250.000 Hz  
FIDRES 0.476837 Hz  
AQ 1.0485760 sec  
RG 191.38  
DW 16.000 usec  
DE 6.50 usec  
TE 297.6 K  
D1 2.0000000 sec  
D11 0.0300000 sec  
TD0 1

===== CHANNEL f1 =====  
SFO1 125.7703637 MHz  
NUC1 13C  
P1 10.20 usec  
PLW1 90.0000000 W

===== CHANNEL f2 =====  
SFO2 500.1320005 MHz  
NUC2 1H  
CPDPRG2 waltz16  
PCPD2 80.00 usec  
PLW2 24.0000000 W  
PLW12 0.36015001 W  
PLW13 0.23050000 W

F2 - Processing parameters  
SI 65536  
SF 125.7577885 MHz  
WDW EM  
SSB 0  
LB 1.00 Hz  
GB 0  
PC 1.40

# <sup>1</sup>H NMR of compound 27b

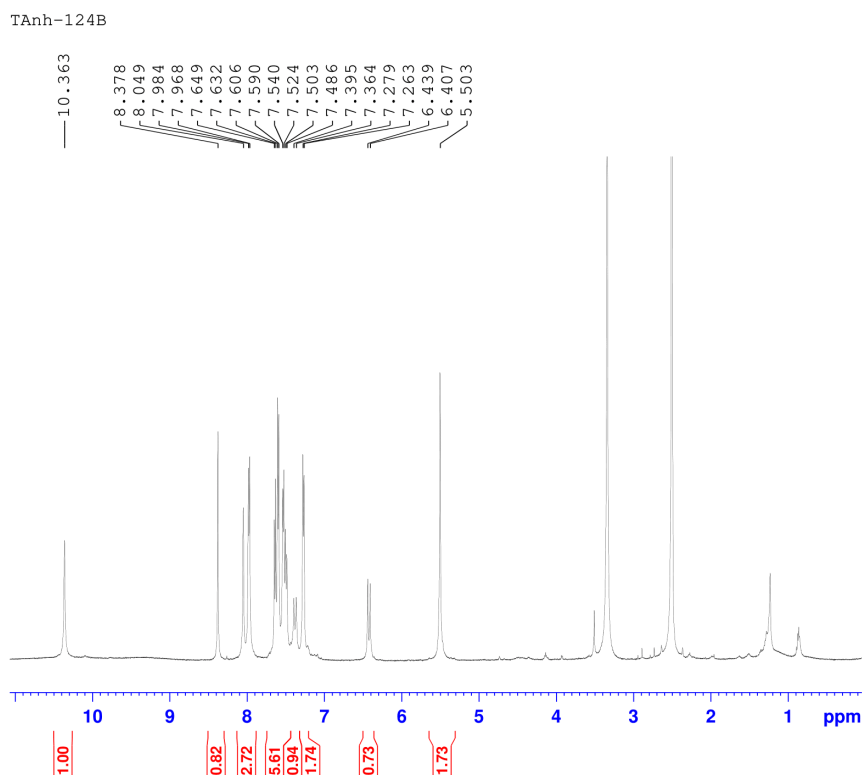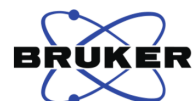

Current Data Parameters  
NAME TAnh-124B  
EXPNO 10  
PROCNO 1

F2 - Acquisition Parameters  
Date\_ 20220114  
Time 8.09  
INSTRUM spect  
PROBHD 5 mm PABBO BB/  
PULPROG zg30  
TD 65536  
SOLVENT DMSO  
NS 16  
DS 2  
SWH 10000.000 Hz  
FIDRES 0.152588 Hz  
AQ 3.2767999 sec  
RG 191.38  
DW 50.000 usec  
DE 6.50 usec  
TE 296.6 K  
D1 1.0000000 sec  
TD0 1

===== CHANNEL f1 =====  
SFO1 500.1330885 MHz  
NUC1 1H  
P1 9.80 usec  
PLW1 24.0000000 W

F2 - Processing parameters  
SI 65536  
SF 500.1300041 MHz  
WDW EM  
SSB 0  
LB 0.30 Hz  
GB 0  
PC 1.00

# <sup>13</sup>C NMR of compound 27b

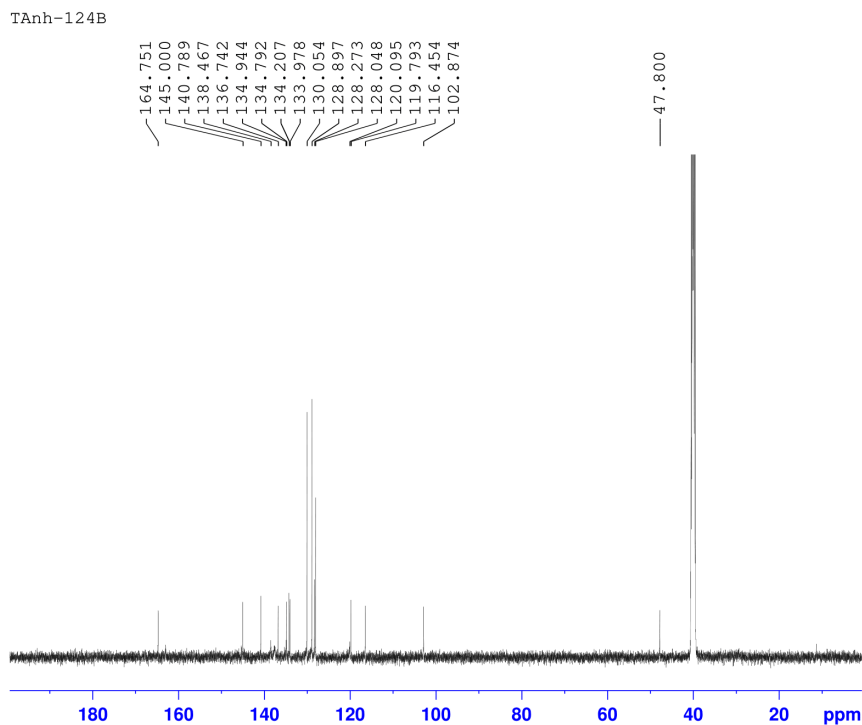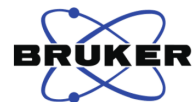

Current Data Parameters  
NAME TAnh-124B  
EXPNO 11  
PROCNO 1

F2 - Acquisition Parameters  
Date\_ 20220114  
Time 9.05  
INSTRUM spect  
PROBHD 5 mm PABBO BB/  
PULPROG zgpg30  
TD 65536  
SOLVENT DMSO  
NS 2048  
DS 4  
SWH 31250.000 Hz  
FIDRES 0.476837 Hz  
AQ 1.0485760 sec  
RG 191.38  
DW 16.000 usec  
DE 6.50 usec  
TE 297.3 K  
D1 2.0000000 sec  
D11 0.0300000 sec  
TD0 1

===== CHANNEL f1 =====  
SFO1 125.7703637 MHz  
NUC1 13C  
P1 10.20 usec  
PLW1 90.0000000 W

===== CHANNEL f2 =====  
SFO2 500.1320005 MHz  
NUC2 1H  
CPDPRG2 waltz16  
PCPD2 80.00 usec  
PLW2 24.0000000 W  
PLW12 0.36015001 W  
PLW13 0.23050000 W

F2 - Processing parameters  
SI 65536  
SF 125.7577885 MHz  
WDW EM  
SSB 0  
LB 1.00 Hz  
GB 0  
PC 1.40

# <sup>1</sup>H NMR of compound 27c

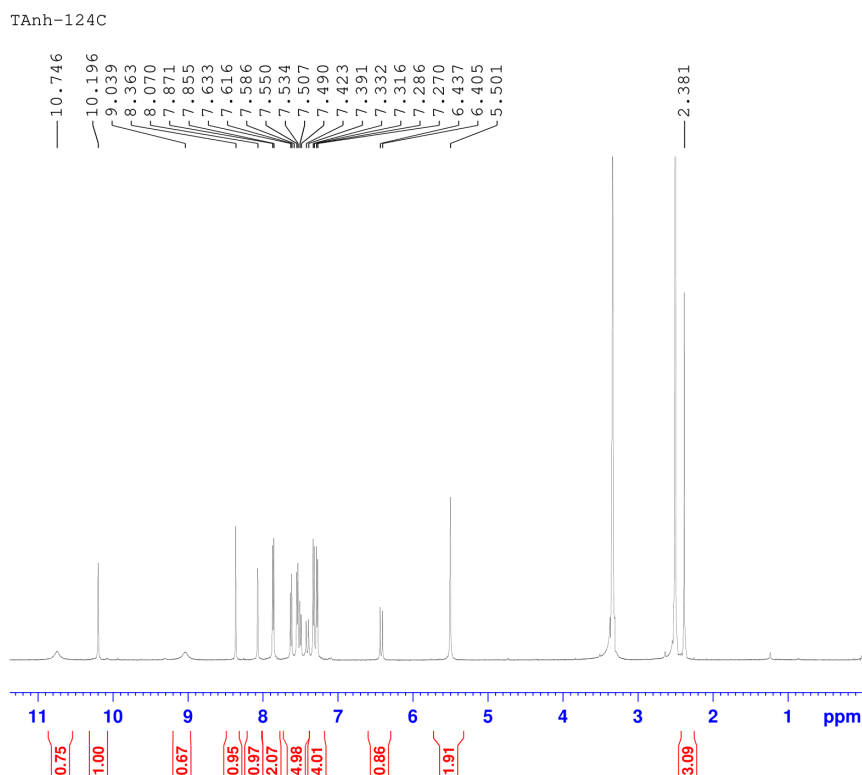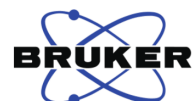

Current Data Parameters  
 NAME TAnh-124C  
 EXPNO 20  
 PROCNO 1

F2 - Acquisition Parameters  
 Date\_ 20220117  
 Time 20.53  
 INSTRUM spect  
 PROBHD 5 mm PABBO BB/  
 PULPROG zg30  
 TD 65536  
 SOLVENT DMSO  
 NS 16  
 DS 2  
 SWH 10000.000 Hz  
 FIDRES 0.152588 Hz  
 AQ 3.2767999 sec  
 RG 191.38  
 DW 50.000 usec  
 DE 6.50 usec  
 TE 297.2 K  
 D1 1.00000000 sec  
 TD0 1

===== CHANNEL f1 =====  
 SFO1 500.1330885 MHz  
 NUC1 1H  
 P1 9.80 usec  
 PLW1 24.00000000 W

F2 - Processing parameters  
 SI 65536  
 SF 500.1300043 MHz  
 WF EM  
 SSB 0  
 LB 0.30 Hz  
 GB 0  
 PC 1.00

# <sup>13</sup>C NMR of compound 27c

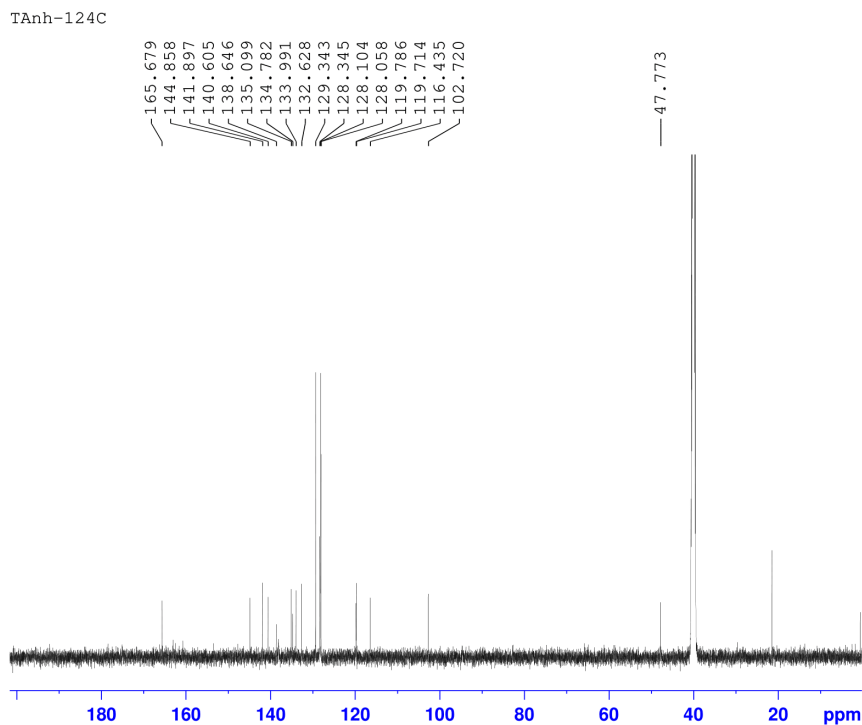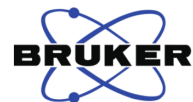

Current Data Parameters  
 NAME TAnh-124C  
 EXPNO 22  
 PROCNO 1

F2 - Acquisition Parameters  
 Date\_ 20220117  
 Time 23.33  
 INSTRUM spect  
 PROBHD 5 mm PABBO BB/  
 PULPROG zgpg30  
 TD 65536  
 SOLVENT DMSO  
 NS 3072  
 DS 4  
 SWH 31250.000 Hz  
 FIDRES 0.476837 Hz  
 AQ 1.0485760 sec  
 RG 191.38  
 DW 16.000 usec  
 DE 6.50 usec  
 TE 297.7 K  
 D1 2.00000000 sec  
 D11 0.03000000 sec  
 TD0 1

===== CHANNEL f1 =====  
 SFO1 125.7703637 MHz  
 NUC1 13C  
 P1 10.20 usec  
 PLW1 90.00000000 W

===== CHANNEL f2 =====  
 SFO2 500.1320005 MHz  
 NUC2 1H  
 CPDPRG2 waltz16  
 PCPD2 80.00 usec  
 PLW2 24.00000000 W  
 PLW12 0.36015001 W  
 PLW13 0.23050000 W

F2 - Processing parameters  
 SI 65536  
 SF 125.7577885 MHz  
 WF EM  
 SSB 0  
 LB 1.00 Hz  
 GB 0  
 PC 1.40

# <sup>1</sup>H NMR of compound 29a

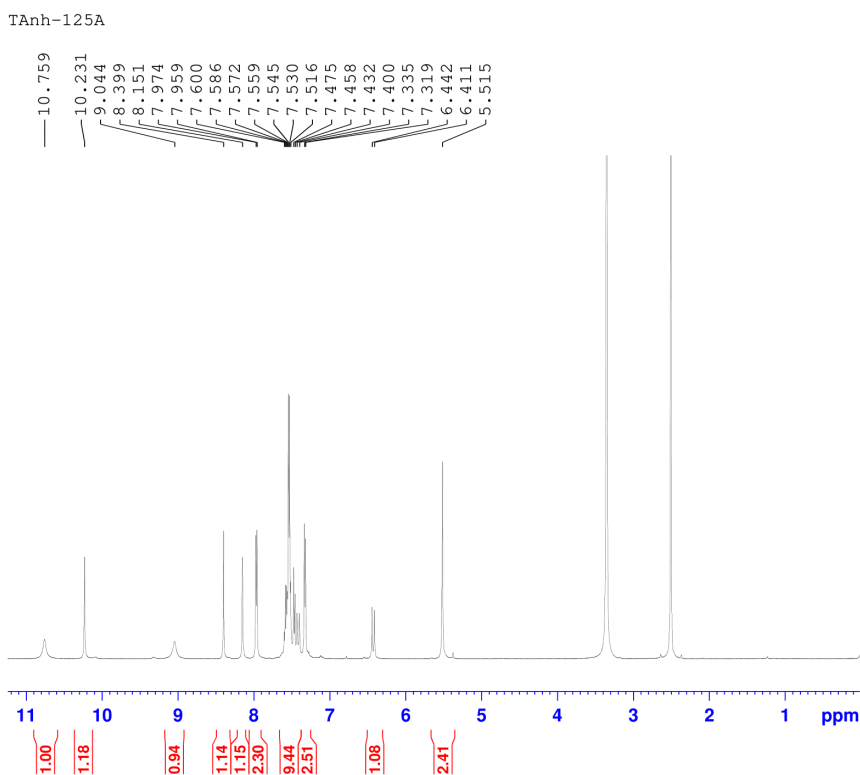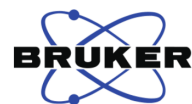

Current Data Parameters  
 NAME TAnh-125A  
 EXPNO 30  
 PROCNO 1

F2 - Acquisition Parameters  
 Date\_ 20220117  
 Time 23.37  
 INSTRUM spect  
 PROBHD 5 mm PABBO BB/  
 PULPROG zg30  
 TD 65536  
 SOLVENT DMSO  
 NS 16  
 DS 2  
 SWH 10000.000 Hz  
 FIDRES 0.152588 Hz  
 AQ 3.2767999 sec  
 RG 191.38  
 DW 50.000 usec  
 DE 6.50 usec  
 TE 297.2 K  
 D1 1.00000000 sec  
 TD0 1

===== CHANNEL f1 =====  
 SFO1 500.1330885 MHz  
 NUC1 1H  
 P1 9.80 usec  
 PLW1 24.00000000 W

F2 - Processing parameters  
 SI 65536  
 SF 500.1300045 MHz  
 WF EM  
 SSB 0  
 LB 0.30 Hz  
 GB 0  
 PC 1.00

# <sup>13</sup>C NMR of compound 29a

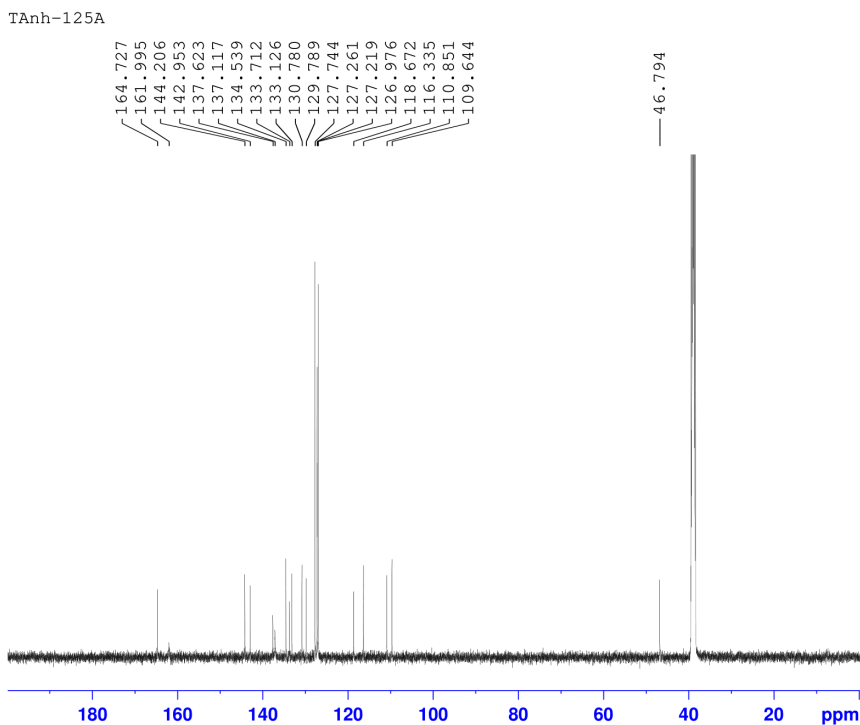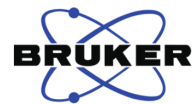

Current Data Parameters  
 NAME TAnh-125A  
 EXPNO 32  
 PROCNO 1

F2 - Acquisition Parameters  
 Date\_ 20220118  
 Time 2.18  
 INSTRUM spect  
 PROBHD 5 mm PABBO BB/  
 PULPROG zgpg30  
 TD 65536  
 SOLVENT DMSO  
 NS 3072  
 DS 4  
 SWH 31250.000 Hz  
 FIDRES 0.476837 Hz  
 AQ 1.0485760 sec  
 RG 191.38  
 DW 16.000 usec  
 DE 6.50 usec  
 TE 297.6 K  
 D1 2.00000000 sec  
 D11 0.03000000 sec  
 TD0 1

===== CHANNEL f1 =====  
 SFO1 125.7703637 MHz  
 NUC1 13C  
 P1 10.20 usec  
 PLW1 90.00000000 W

===== CHANNEL f2 =====  
 SFO2 500.1320005 MHz  
 NUC2 1H  
 CPDPRG2 waltz16  
 PCPD2 80.00 usec  
 PLW2 24.00000000 W  
 PLW12 0.36015001 W  
 PLW13 0.23050000 W

F2 - Processing parameters  
 SI 65536  
 SF 125.7579255 MHz  
 WF EM  
 SSB 0  
 LB 1.00 Hz  
 GB 0  
 PC 1.40

# <sup>1</sup>H NMR of compound 29b

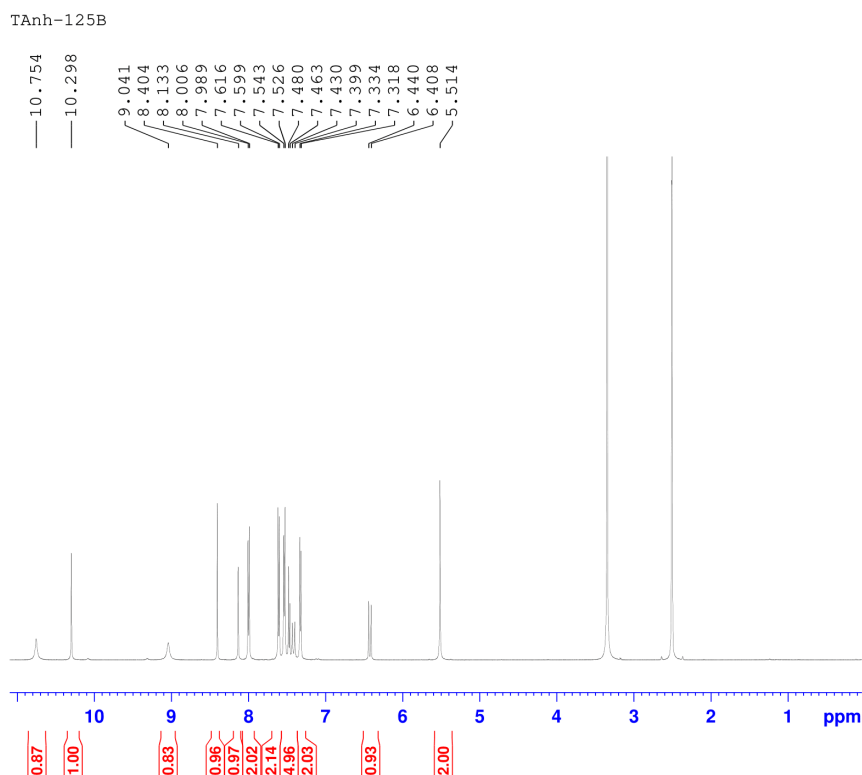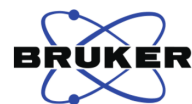

Current Data Parameters  
 NAME TAnh-125B  
 EXPNO 40  
 PROCNO 1

F2 - Acquisition Parameters  
 Date\_ 20220118  
 Time 2.21  
 INSTRUM spect  
 PROBHD 5 mm PABBO BB/  
 PULPROG zg30  
 TD 65536  
 SOLVENT DMSO  
 NS 16  
 DS 2  
 SWH 10000.000 Hz  
 FIDRES 0.152588 Hz  
 AQ 3.2767999 sec  
 RG 191.38  
 DW 50.000 usec  
 DE 6.50 usec  
 TE 297.2 K  
 D1 1.00000000 sec  
 TD0 1

===== CHANNEL f1 =====  
 SFO1 500.1330885 MHz  
 NUC1 1H  
 P1 9.80 usec  
 PLW1 24.00000000 W

F2 - Processing parameters  
 SI 65536  
 SF 500.1300032 MHz  
 WDW EM  
 SSB 0  
 LB 0.30 Hz  
 GB 0  
 PC 1.00

# <sup>13</sup>C NMR of compound 29b

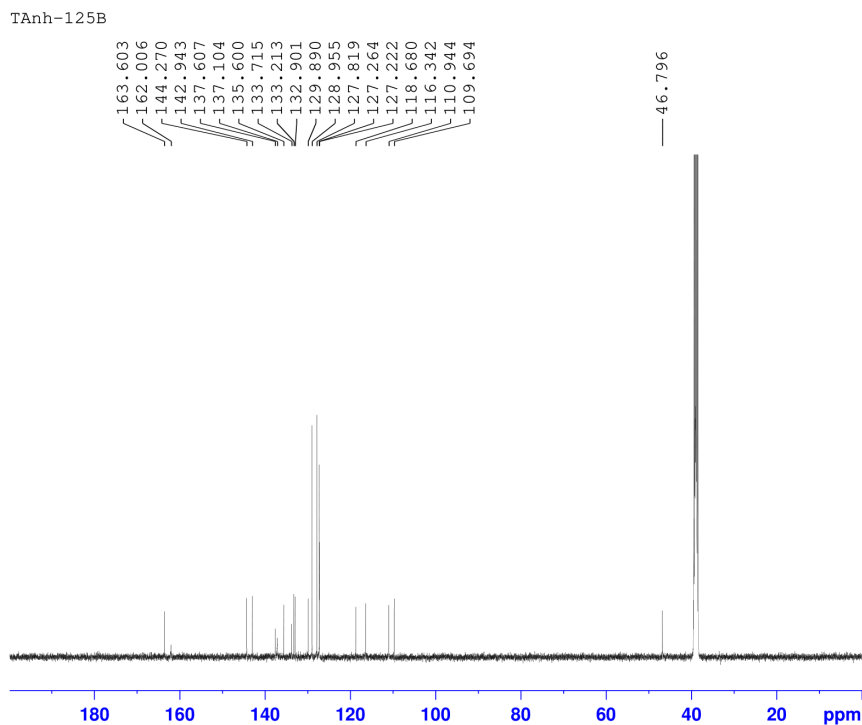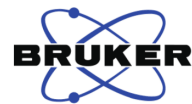

Current Data Parameters  
 NAME TAnh-125B  
 EXPNO 42  
 PROCNO 1

F2 - Acquisition Parameters  
 Date\_ 20220118  
 Time 5.02  
 INSTRUM spect  
 PROBHD 5 mm PABBO BB/  
 PULPROG zgpg30  
 TD 65536  
 SOLVENT DMSO  
 NS 3072  
 DS 4  
 SWH 31250.000 Hz  
 FIDRES 0.476837 Hz  
 AQ 1.0485760 sec  
 RG 191.38  
 DW 16.000 usec  
 DE 6.50 usec  
 TE 297.7 K  
 D1 2.00000000 sec  
 D11 0.03000000 sec  
 TD0 1

===== CHANNEL f1 =====  
 SFO1 125.7703637 MHz  
 NUC1 13C  
 P1 10.20 usec  
 PLW1 90.00000000 W

===== CHANNEL f2 =====  
 SFO2 500.1320005 MHz  
 NUC2 1H  
 CPDPRG2 waltz16  
 PCPD2 80.00 usec  
 PLW2 24.00000000 W  
 PLW12 0.36015001 W  
 PLW13 0.23050000 W

F2 - Processing parameters  
 SI 65536  
 SF 125.7579249 MHz  
 WDW EM  
 SSB 0  
 LB 1.00 Hz  
 GB 0  
 PC 1.40

# <sup>1</sup>H NMR of compound 29c

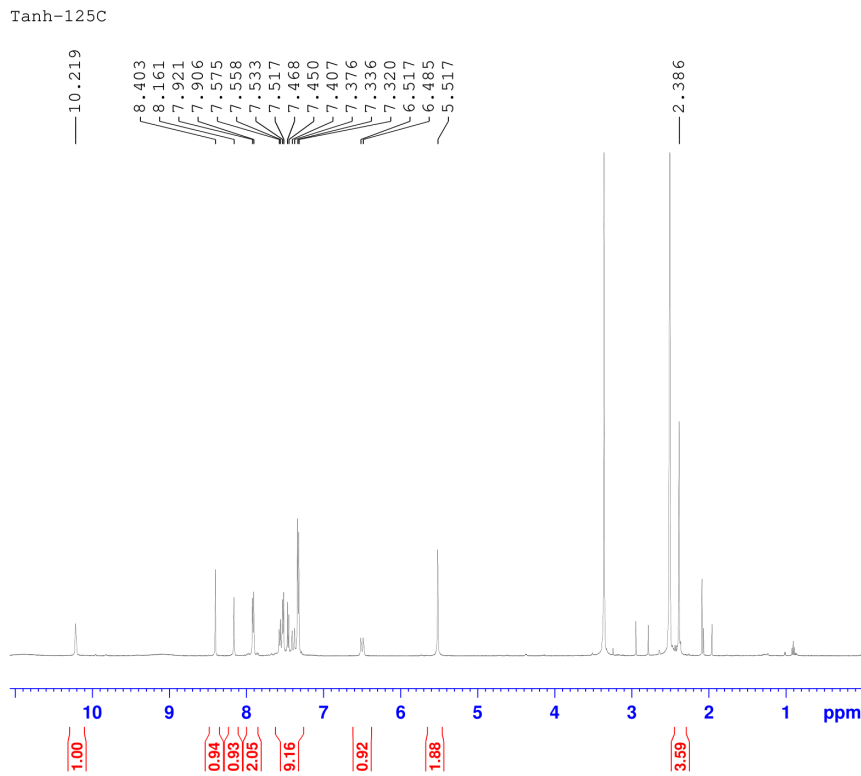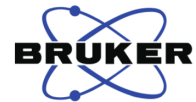

Current Data Parameters  
 NAME Tanh-125C  
 EXPNO 10  
 PROCNO 1

F2 - Acquisition Parameters  
 Date\_ 20220118  
 Time 9.27  
 INSTRUM spect  
 PROBHD 5 mm PABBO BB/  
 PULPROG zg30  
 TD 65536  
 SOLVENT DMSO  
 NS 16  
 DS 2  
 SWH 10000.000 Hz  
 FIDRES 0.152588 Hz  
 AQ 3.2767999 sec  
 RG 191.38  
 DW 50.000 usec  
 DE 6.50 usec  
 TE 296.5 K  
 D1 1.0000000 sec  
 TDO 1

===== CHANNEL f1 =====  
 SFO1 500.1330885 MHz  
 NUC1 1H  
 P1 9.80 usec  
 PLW1 24.0000000 W

F2 - Processing parameters  
 SI 65536  
 SF 500.1300025 MHz  
 WDW EM  
 SSB 0  
 LB 0.30 Hz  
 GB 0  
 PC 1.00

# <sup>13</sup>C NMR of compound 29c

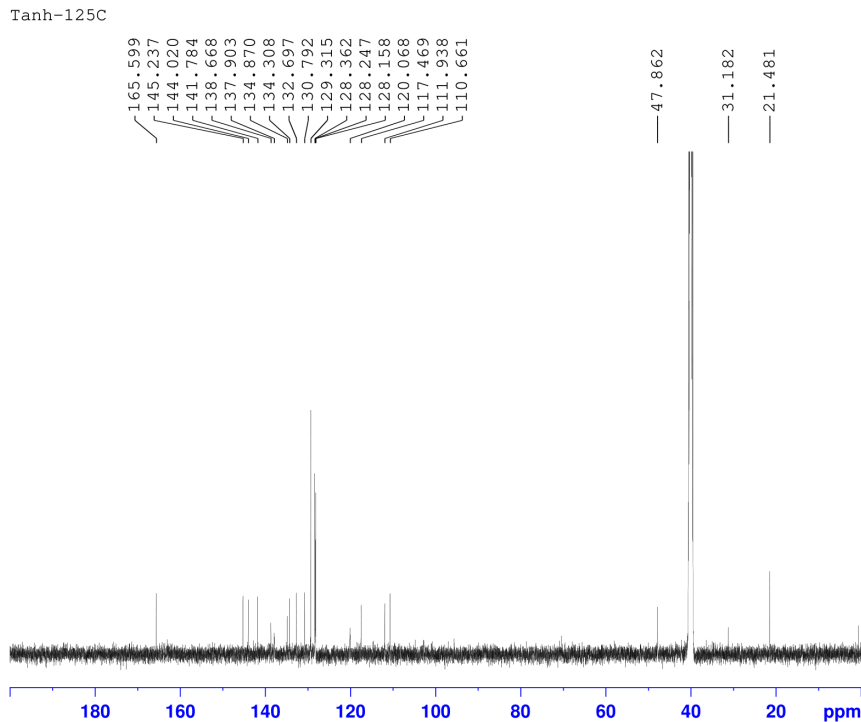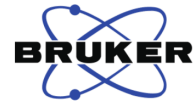

Current Data Parameters  
 NAME Tanh-125C  
 EXPNO 11  
 PROCNO 1

F2 - Acquisition Parameters  
 Date\_ 20220119  
 Time 9.01  
 INSTRUM spect  
 PROBHD 5 mm PABBO BB/  
 PULPROG zgpg30  
 TD 65536  
 SOLVENT DMSO  
 NS 3072  
 DS 4  
 SWH 31250.000 Hz  
 FIDRES 0.476837 Hz  
 AQ 1.0485760 sec  
 RG 191.38  
 DW 16.000 usec  
 DE 6.50 usec  
 TE 296.3 K  
 D1 2.0000000 sec  
 D11 0.0300000 sec  
 TDO 1

===== CHANNEL f1 =====  
 SFO1 125.7703637 MHz  
 NUC1 13C  
 P1 10.20 usec  
 PLW1 90.0000000 W

===== CHANNEL f2 =====  
 SFO2 500.1320005 MHz  
 NUC2 1H  
 CPDPRG2 waltz16  
 PCPD2 80.00 usec  
 PLW2 24.0000000 W  
 PLW12 0.36015001 W  
 PLW13 0.23050000 W

F2 - Processing parameters  
 SI 65536  
 SF 125.7577885 MHz  
 WDW EM  
 SSB 0  
 LB 1.00 Hz  
 GB 0  
 PC 1.40



# <sup>1</sup>H NMR of compound 31a

TAnh-128A

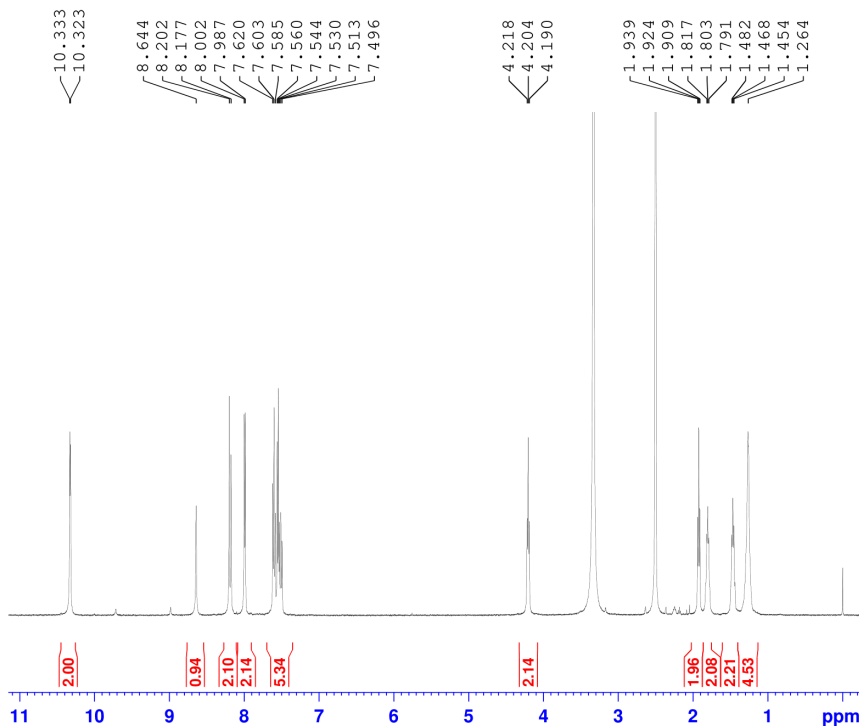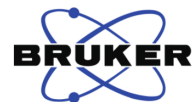

Current Data Parameters  
 NAME TAnh-128A  
 EXPNO 10  
 PROCNO 1

F2 - Acquisition Parameters  
 Date\_ 20230215  
 Time 10.45  
 INSTRUM spect  
 PROBHD 5 mm PABBO BB/  
 PULPROG zg30  
 TD 65536  
 SOLVENT DMSO  
 NS 16  
 DS 2  
 SWH 10000.000 Hz  
 FIDRES 0.152588 Hz  
 AQ 3.2767999 sec  
 RG 191.38  
 DW 50.000 usec  
 DE 6.50 usec  
 TE 297.9 K  
 D1 1.00000000 sec  
 TDO 1

===== CHANNEL f1 =====  
 SFO1 500.1330885 MHz  
 NUC1 1H  
 P1 9.80 usec  
 PLW1 24.0000000 W

F2 - Processing parameters  
 SI 65536  
 SF 500.1300047 MHz  
 WDW EM  
 SSB 0  
 LB 0.30 Hz  
 GB 0  
 PC 1.00

# <sup>13</sup>C NMR of compound 31a

TAnh-128A

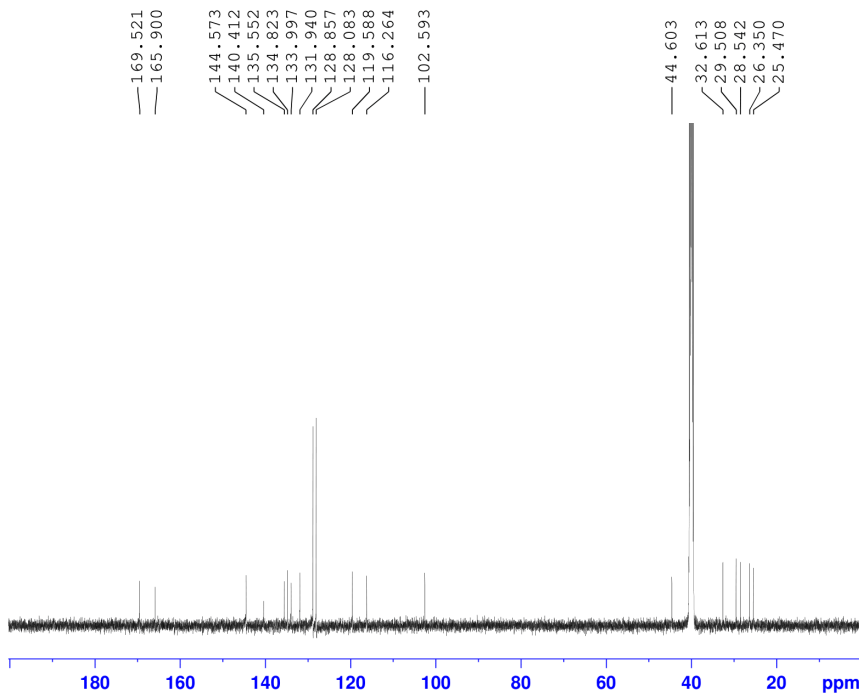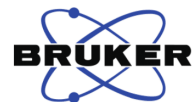

Current Data Parameters  
 NAME TAnh-128A  
 EXPNO 11  
 PROCNO 1

F2 - Acquisition Parameters  
 Date\_ 20230216  
 Time 3.19  
 INSTRUM spect  
 PROBHD 5 mm PABBO BB/  
 PULPROG zgpg30  
 TD 65536  
 SOLVENT DMSO  
 NS 3072  
 DS 4  
 SWH 31250.000 Hz  
 FIDRES 0.476837 Hz  
 AQ 1.0485760 sec  
 RG 191.38  
 DW 16.000 usec  
 DE 6.50 usec  
 TE 300.1 K  
 D1 2.00000000 sec  
 D11 0.03000000 sec  
 TDO 1

===== CHANNEL f1 =====  
 SFO1 125.7703637 MHz  
 NUC1 13C  
 P1 10.20 usec  
 PLW1 90.0000000 W

===== CHANNEL f2 =====  
 SFO2 500.1320005 MHz  
 NUC2 1H  
 CPDPRG2 waltz16  
 PCPD2 80.00 usec  
 PLW2 24.0000000 W  
 PLW12 0.36015001 W  
 PLW13 0.23050000 W

F2 - Processing parameters  
 SI 65536  
 SF 125.7577885 MHz  
 WDW EM  
 SSB 0  
 LB 1.00 Hz  
 GB 0  
 PC 1.40

# <sup>1</sup>H NMR of compound 31b

TAnh-128B

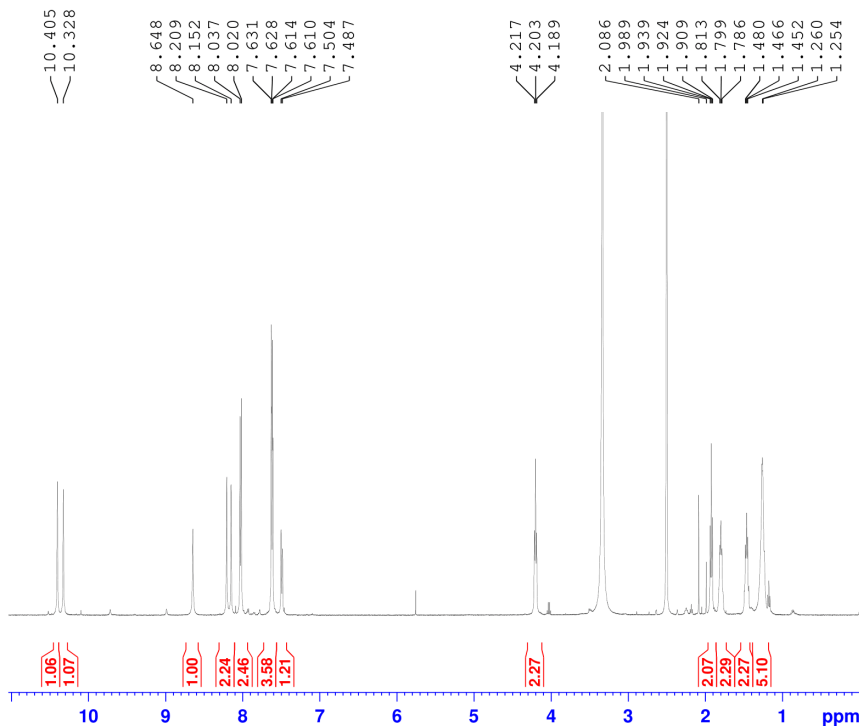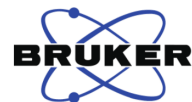

Current Data Parameters  
NAME TAnh-128B  
EXPNO 20  
PROCNO 1

F2 - Acquisition Parameters  
Date\_ 20230215  
Time 10.49  
INSTRUM spect  
PROBHD 5 mm PABBO BB/  
PULPROG zg30  
TD 65536  
SOLVENT DMSO  
NS 16  
DS 2  
SWH 10000.000 Hz  
FIDRES 0.152588 Hz  
AQ 3.2767999 sec  
RG 191.38  
DW 50.000 usec  
DE 6.50 usec  
TE 297.9 K  
D1 1.00000000 sec  
TD0 1

===== CHANNEL f1 =====  
SFO1 500.1330885 MHz  
NUC1 1H  
P1 9.80 usec  
PLW1 24.00000000 W

F2 - Processing parameters  
SI 65536  
SF 500.1300037 MHz  
WDW EM  
SSB 0  
LB 0.30 Hz  
GB 0  
PC 1.00

# <sup>13</sup>C NMR of compound 31b

TAnh-128B

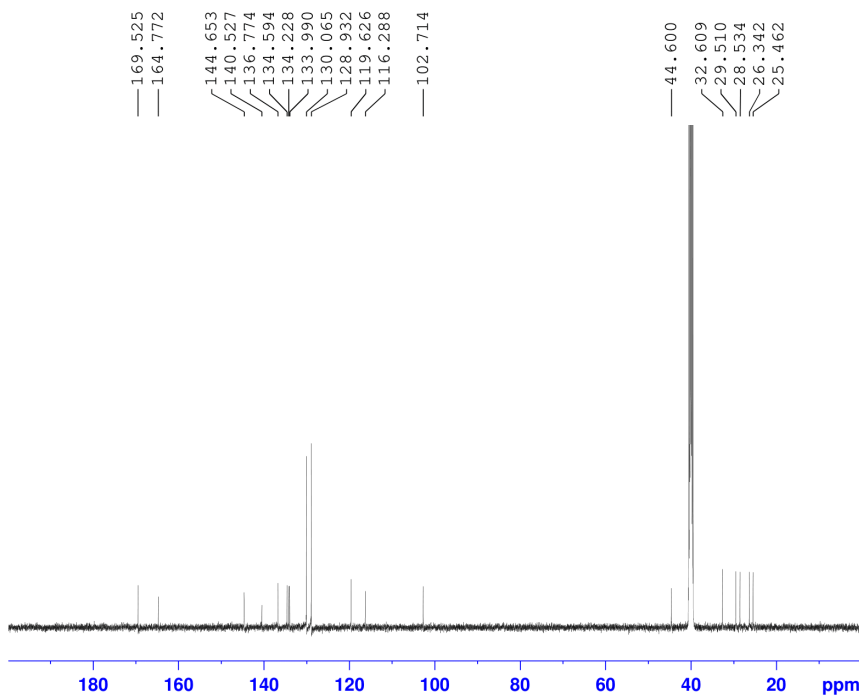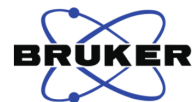

Current Data Parameters  
NAME TAnh-128B  
EXPNO 21  
PROCNO 1

F2 - Acquisition Parameters  
Date\_ 20230216  
Time 5.01  
INSTRUM spect  
PROBHD 5 mm PABBO BB/  
PULPROG zgpg30  
TD 65536  
SOLVENT DMSO  
NS 3072  
DS 4  
SWH 31250.000 Hz  
FIDRES 0.476837 Hz  
AQ 1.0485760 sec  
RG 191.38  
DW 16.000 usec  
DE 6.50 usec  
TE 299.9 K  
D1 2.00000000 sec  
D11 0.03000000 sec  
TD0 1

===== CHANNEL f1 =====  
SFO1 125.7703637 MHz  
NUC1 13C  
P1 10.20 usec  
PLW1 90.00000000 W

===== CHANNEL f2 =====  
SFO2 500.1320005 MHz  
NUC2 1H  
CPDPRG2 waltz16  
PCPD2 80.00 usec  
PLW2 24.00000000 W  
PLW12 0.36015001 W  
PLW13 0.23050000 W

F2 - Processing parameters  
SI 65536  
SF 125.7577885 MHz  
WDW EM  
SSB 0  
LB 1.00 Hz  
GB 0  
PC 1.40

# <sup>1</sup>H NMR of compound 31c

TAnh-128C

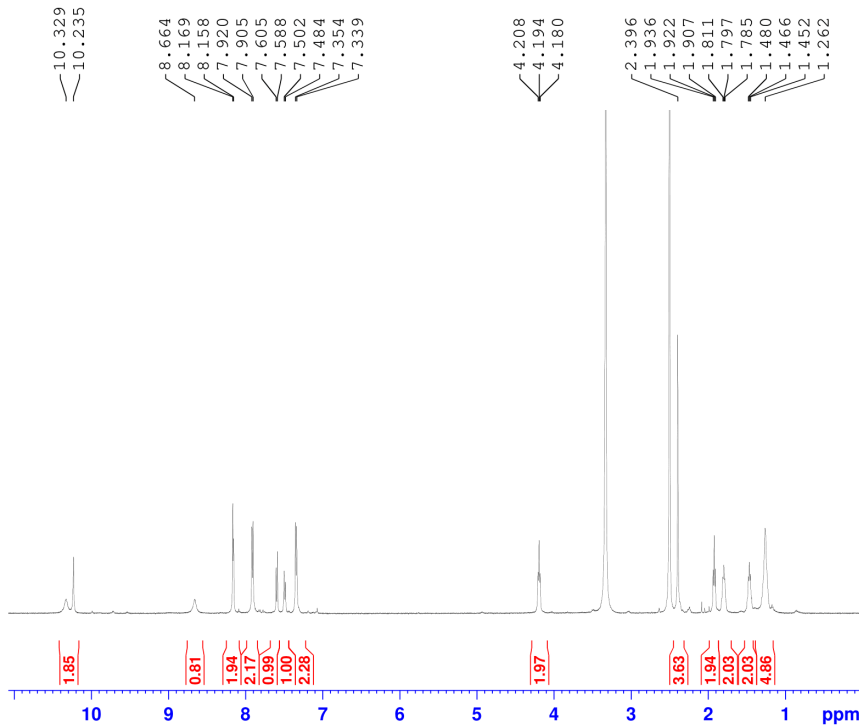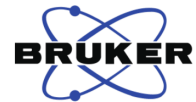

Current Data Parameters  
 NAME TAnh-128C  
 EXPNO 30  
 PROCNO 1

F2 - Acquisition Parameters  
 Date\_ 20230215  
 Time 10.52  
 INSTRUM spect  
 PROBHD 5 mm PABBO BB/  
 PULPROG zg30  
 TD 65536  
 SOLVENT DMSO  
 NS 16  
 DS 2  
 SWH 10000.000 Hz  
 FIDRES 0.152588 Hz  
 AQ 3.2767999 sec  
 RG 191.38  
 DW 50.000 usec  
 DE 6.50 usec  
 TE 297.7 K  
 D1 1.00000000 sec  
 TDO 1

===== CHANNEL f1 =====  
 SFO1 500.1330885 MHz  
 NUC1 1H  
 P1 9.80 usec  
 PLW1 24.0000000 W

F2 - Processing parameters  
 SI 65536  
 SF 500.1300045 MHz  
 WDW EM  
 SSB 0  
 LB 0.30 Hz  
 GB 0  
 PC 1.00

# <sup>13</sup>C NMR of compound 31c

TAnh-128C

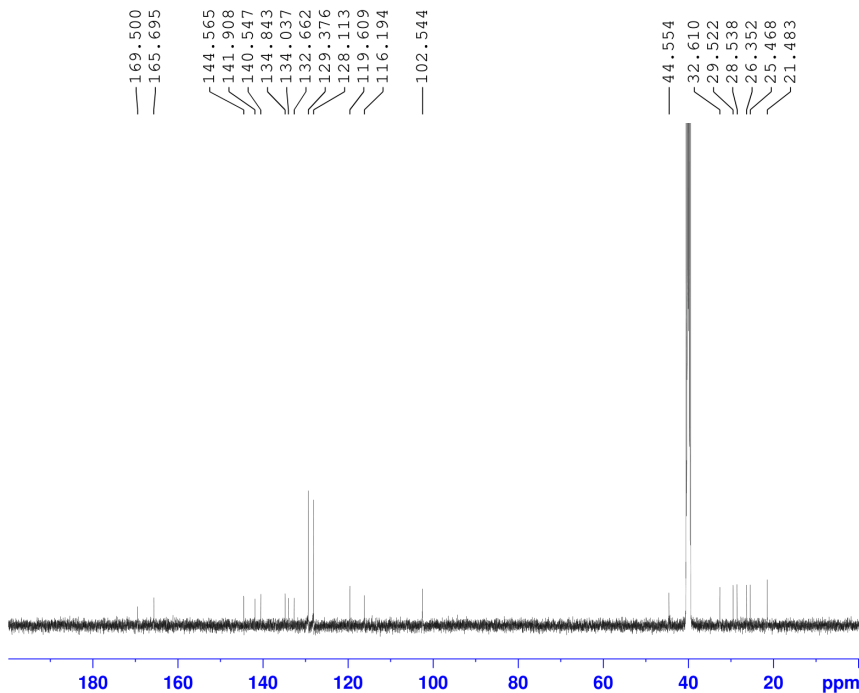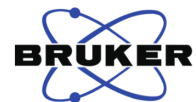

Current Data Parameters  
 NAME TAnh-128C  
 EXPNO 31  
 PROCNO 1

F2 - Acquisition Parameters  
 Date\_ 20230216  
 Time 7.26  
 INSTRUM spect  
 PROBHD 5 mm PABBO BB/  
 PULPROG zgpg30  
 TD 65536  
 SOLVENT DMSO  
 NS 3072  
 DS 4  
 SWH 31250.000 Hz  
 FIDRES 0.476837 Hz  
 AQ 1.0485760 sec  
 RG 191.38  
 DW 16.000 usec  
 DE 6.50 usec  
 TE 300.1 K  
 D1 2.00000000 sec  
 D11 0.03000000 sec  
 TDO 1

===== CHANNEL f1 =====  
 SFO1 125.7703637 MHz  
 NUC1 13C  
 P1 10.20 usec  
 PLW1 90.0000000 W

===== CHANNEL f2 =====  
 SFO2 500.1320005 MHz  
 NUC2 1H  
 CPDPRG2 waltz16  
 PCPD2 80.00 usec  
 PLW2 24.0000000 W  
 PLW12 0.36015001 W  
 PLW13 0.23050000 W

F2 - Processing parameters  
 SI 65536  
 SF 125.7577885 MHz  
 WDW EM  
 SSB 0  
 LB 1.00 Hz  
 GB 0  
 PC 1.40

<sup>1</sup>H NMR of compound 33a

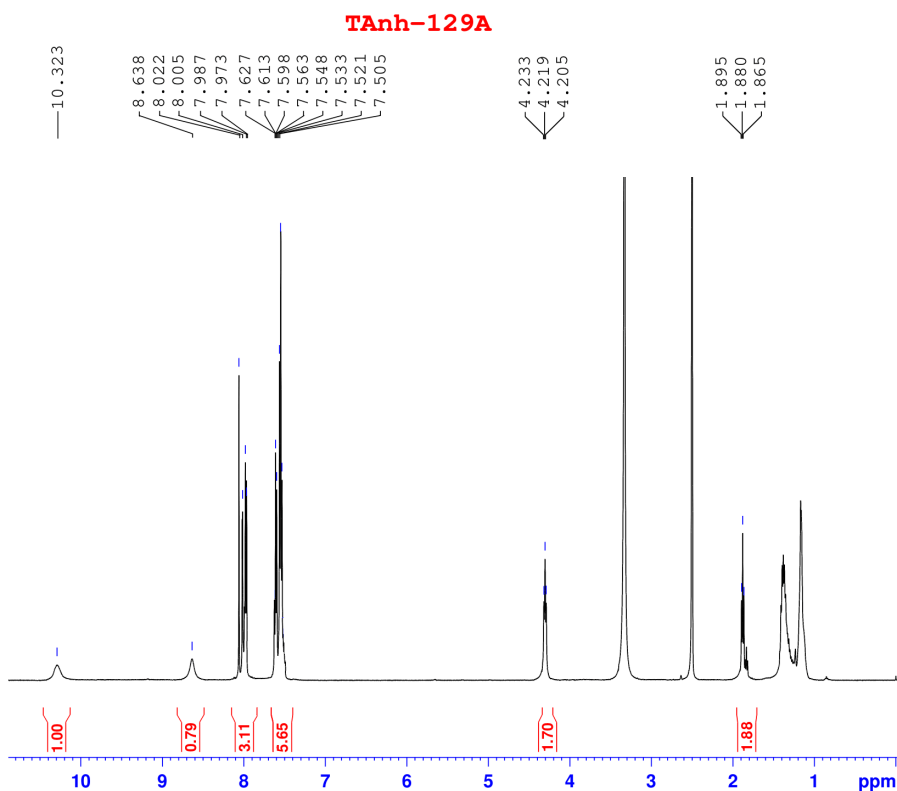

<sup>13</sup>C NMR of compound 33a

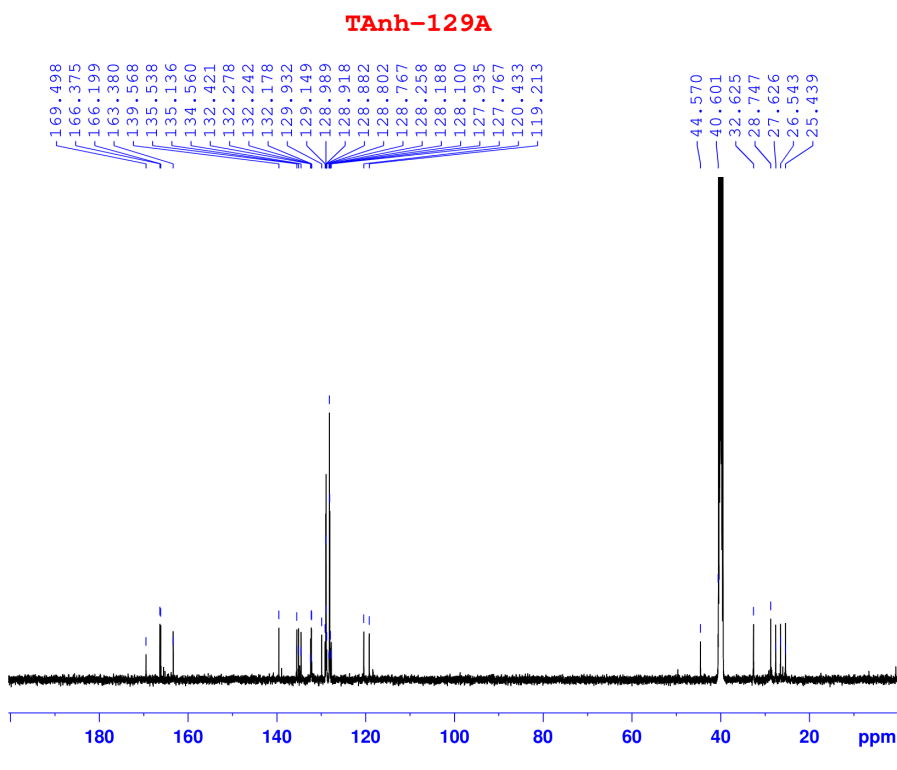

# <sup>1</sup>H NMR of compound 33b

TAnh-129B

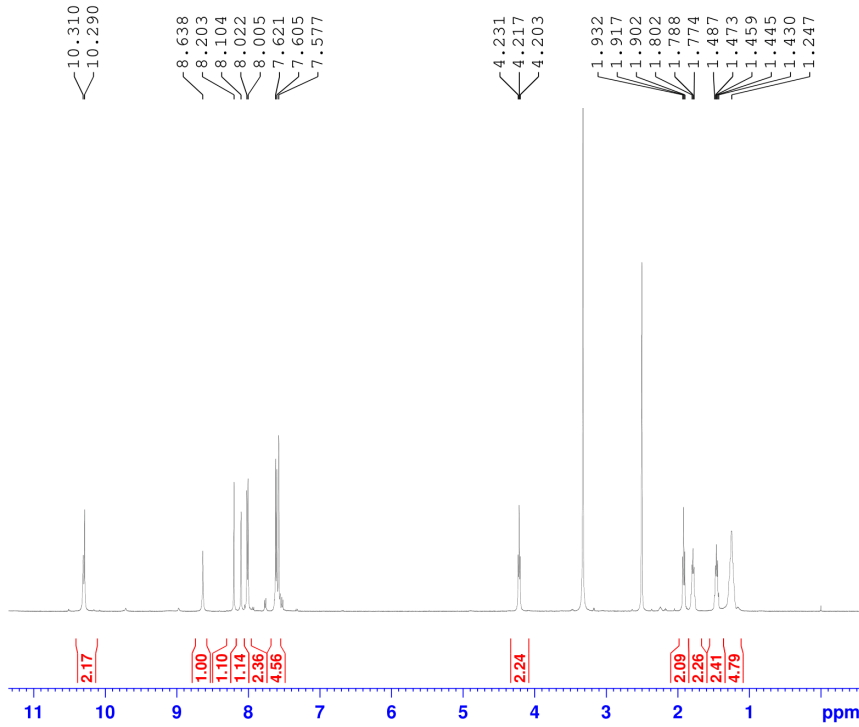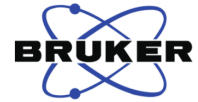

Current Data Parameters  
NAME TAnh-129B  
EXPNO 10  
PROCNO 1

F2 - Acquisition Parameters  
Date\_ 20230222  
Time 9.39  
INSTRUM spect  
PROBHD 5 mm PABBO BB/  
PULPROG zg30  
TD 65536  
SOLVENT DMSO  
NS 16  
DS 2  
SWH 10000.000 Hz  
FIDRES 0.152588 Hz  
AQ 3.2767999 sec  
RG 191.38  
DW 50.000 usec  
DE 6.50 usec  
TE 299.8 K  
D1 1.00000000 sec  
TD0 1

===== CHANNEL f1 =====  
SFO1 500.1330885 MHz  
NUC1 1H  
P1 9.80 usec  
PLW1 24.00000000 W

F2 - Processing parameters  
SI 65536  
SF 500.1300039 MHz  
WDW EM  
SSB 0  
LB 0.30 Hz  
GB 0  
PC 1.00

# <sup>13</sup>C NMR of compound 33b

TAnh-129B

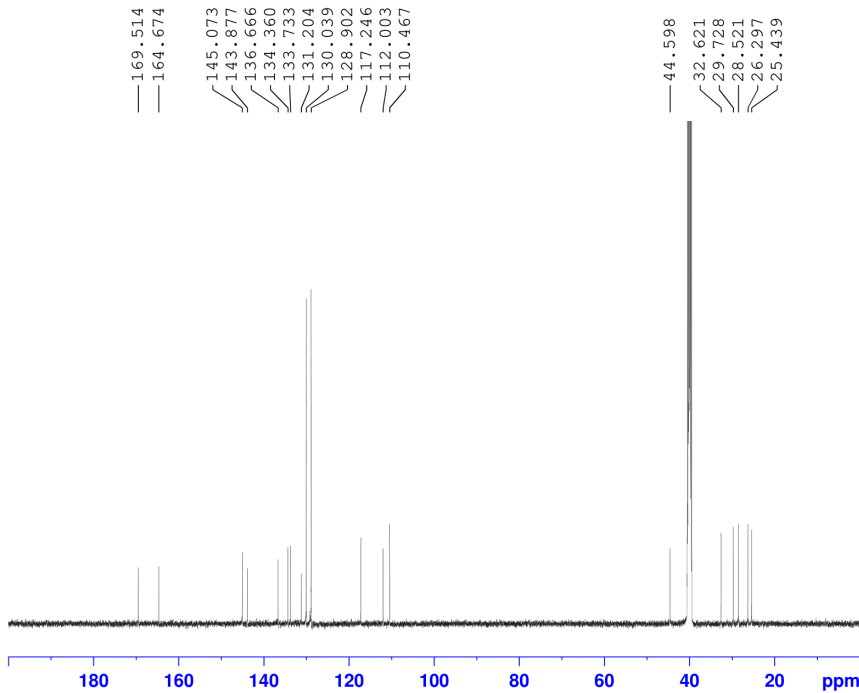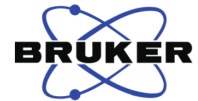

Current Data Parameters  
NAME TAnh-129B  
EXPNO 11  
PROCNO 1

F2 - Acquisition Parameters  
Date\_ 20230222  
Time 21.46  
INSTRUM spect  
PROBHD 5 mm PABBO BB/  
PULPROG zgpg30  
TD 65536  
SOLVENT DMSO  
NS 6144  
DS 4  
SWH 31250.000 Hz  
FIDRES 0.476837 Hz  
AQ 1.0485760 sec  
RG 191.38  
DW 16.000 usec  
DE 6.50 usec  
TE 301.0 K  
D1 2.00000000 sec  
D11 0.03000000 sec  
TD0 1

===== CHANNEL f1 =====  
SFO1 125.7703637 MHz  
NUC1 13C  
P1 10.20 usec  
PLW1 90.00000000 W

===== CHANNEL f2 =====  
SFO2 500.1320005 MHz  
NUC2 1H  
CPDPRG2 waltz16  
PCPD2 80.00 usec  
PLW2 24.00000000 W  
PLW12 0.36015001 W  
PLW13 0.23050000 W

F2 - Processing parameters  
SI 65536  
SF 125.7577885 MHz  
WDW EM  
SSB 0  
LB 1.00 Hz  
GB 0  
PC 1.40

<sup>1</sup>H NMR of compound 33c

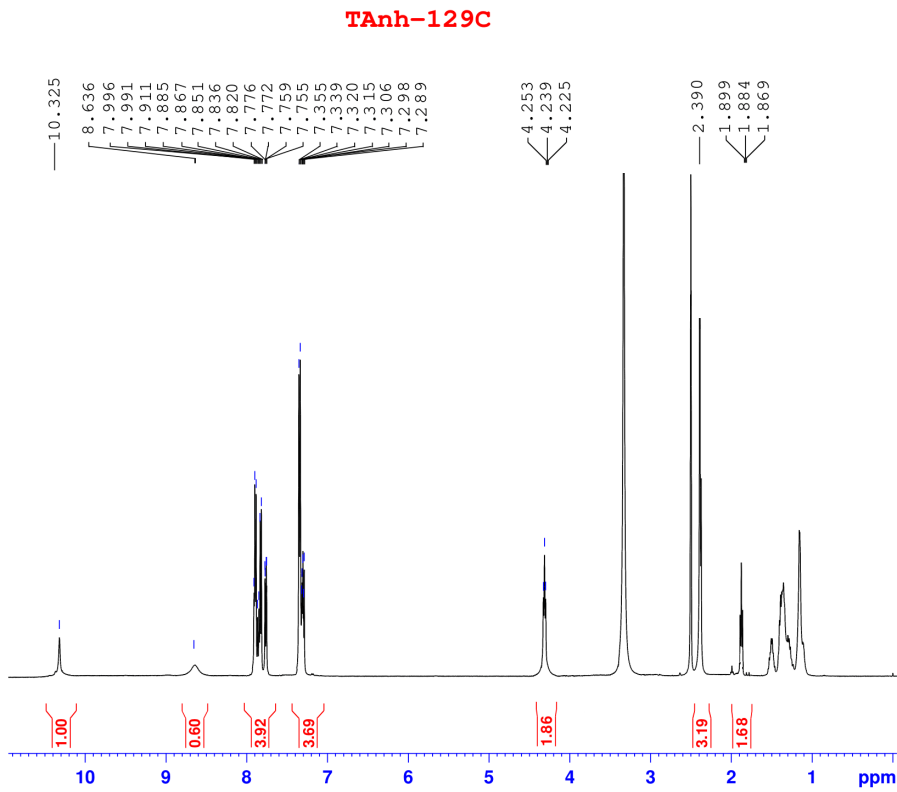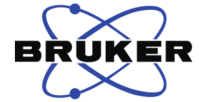

Current Data Parameters  
NAME TAnh-129C  
EXPNO 20  
PROCNO 1

F2 - Acquisition Parameters  
Date\_ 20230301  
Time 19.43  
INSTRUM spect  
PROBHD 5 mm PABBO BB/  
PULPROG zg30  
TD 65536  
SOLVENT DMSO  
NS 16  
DS 2  
SWH 10000.000 Hz  
FIDRES 0.152588 Hz  
AQ 3.2767999 sec  
RG 191.38  
DW 50.000 usec  
DE 6.50 usec  
TE 299.9 K  
D1 1.00000000 sec  
TD0 1

===== CHANNEL f1 =====  
SFO1 500.1330885 MHz  
NUC1 1H  
P1 9.80 usec  
PLW1 24.00000000 W

F2 - Processing parameters  
SI 65536  
SF 500.1300047 MHz  
WDW EM  
SSB 0  
LB 0.30 Hz  
GB 0  
PC 1.00

<sup>13</sup>C NMR of compound 33c

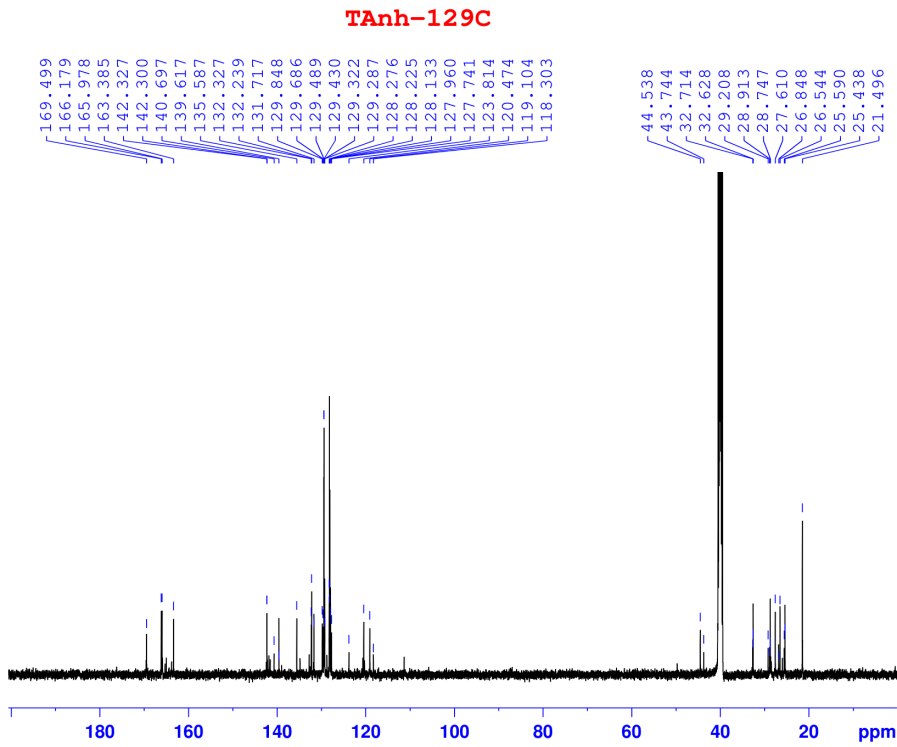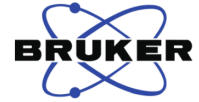

Current Data Parameters  
NAME TAnh-129C  
EXPNO 22  
PROCNO 1

F2 - Acquisition Parameters  
Date\_ 20230301  
Time 22.24  
INSTRUM spect  
PROBHD 5 mm PABBO BB/  
PULPROG zgpg30  
TD 65536  
SOLVENT DMSO  
NS 3072  
DS 4  
SWH 31250.000 Hz  
FIDRES 0.476837 Hz  
AQ 1.0485760 sec  
RG 191.38  
DW 16.000 usec  
DE 6.50 usec  
TE 300.9 K  
D1 2.00000000 sec  
D11 0.03000000 sec  
TD0 1

===== CHANNEL f1 =====  
SFO1 125.7703637 MHz  
NUC1 13C  
P1 10.20 usec  
PLW1 90.00000000 W

===== CHANNEL f2 =====  
SFO2 500.1320005 MHz  
NUC2 1H  
CPDPRG2 waltz16  
PCPD2 80.00 usec  
PLW2 24.00000000 W  
PLW12 0.36015001 W  
PLW13 0.23050000 W

F2 - Processing parameters  
SI 65536  
SF 125.7577885 MHz  
WDW EM  
SSB 0  
LB 1.00 Hz  
GB 0  
PC 1.40

### HRMS of compound 6a

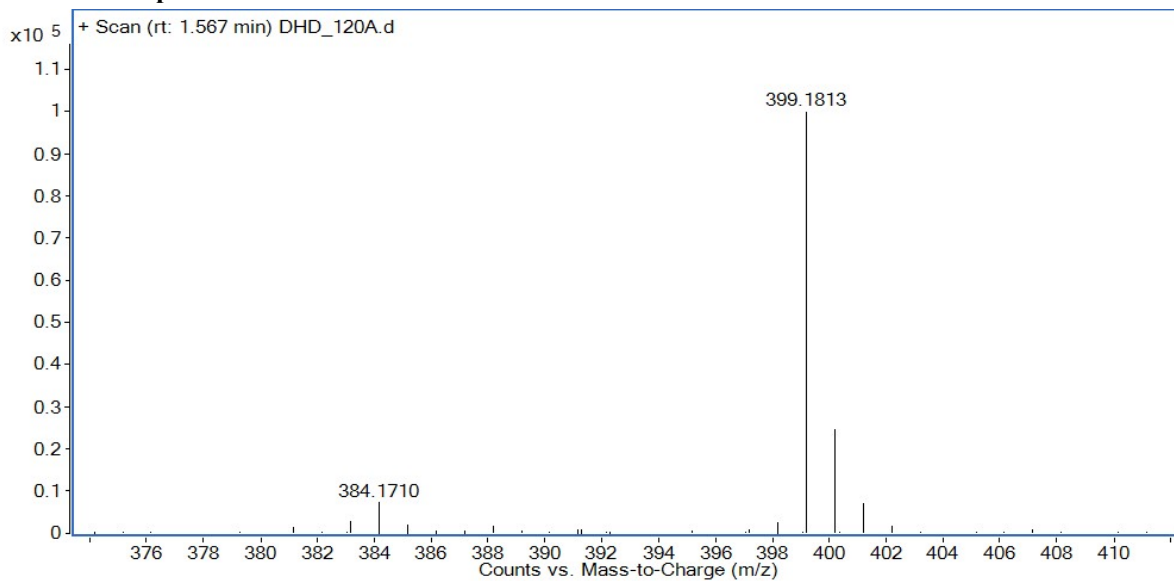

### HRMS of compound 6b

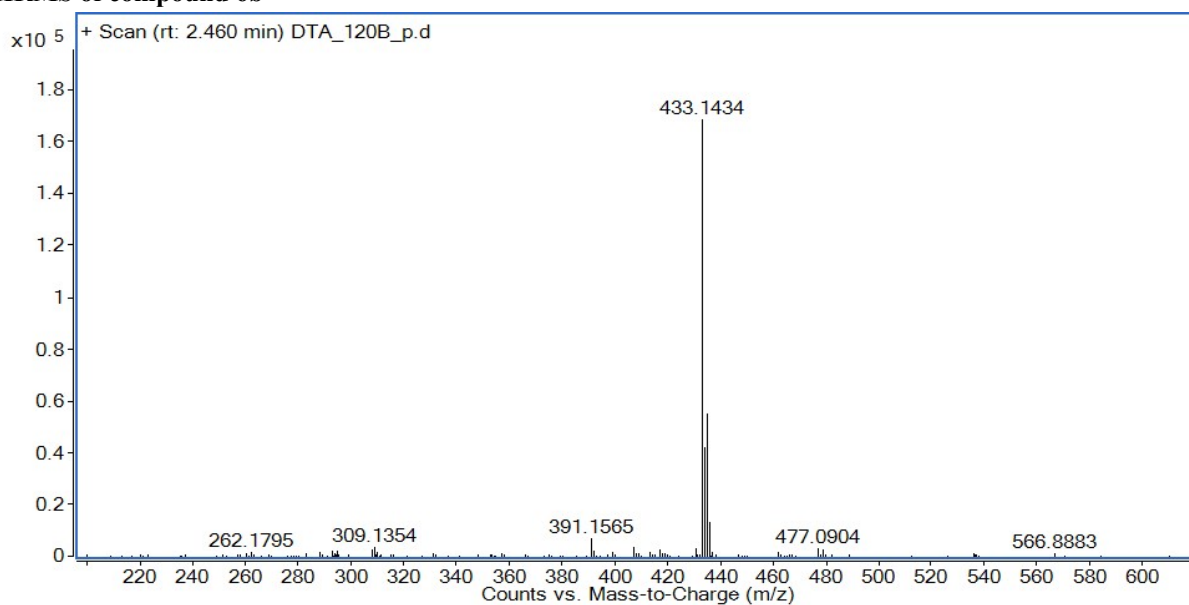

### HRMS of compound 6c

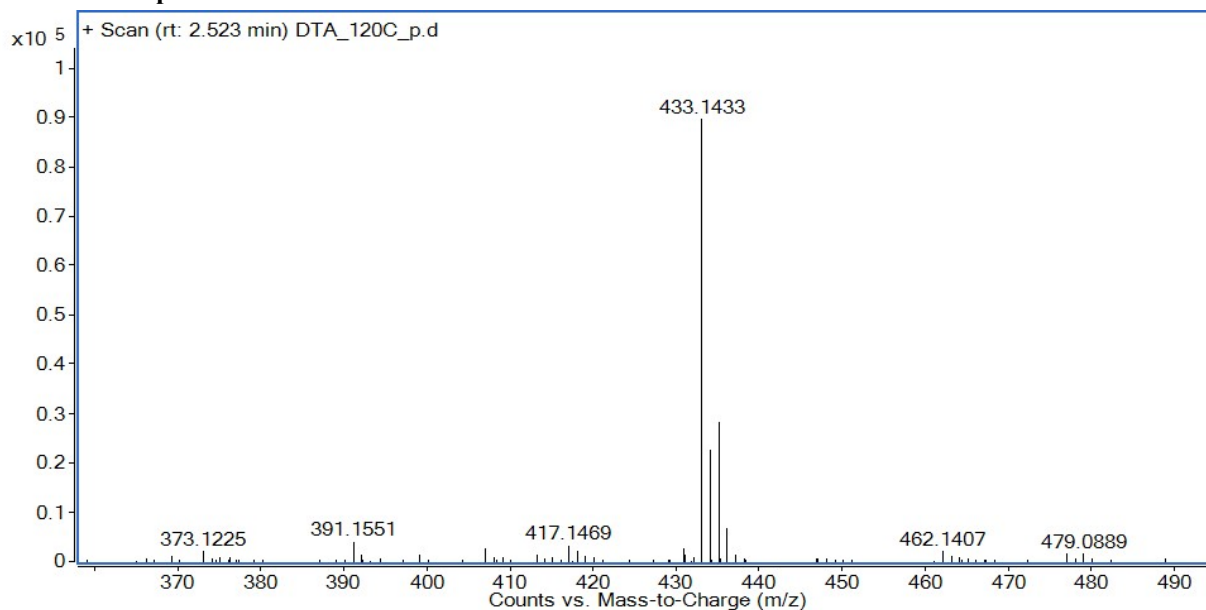

### HRMS of compound 6d

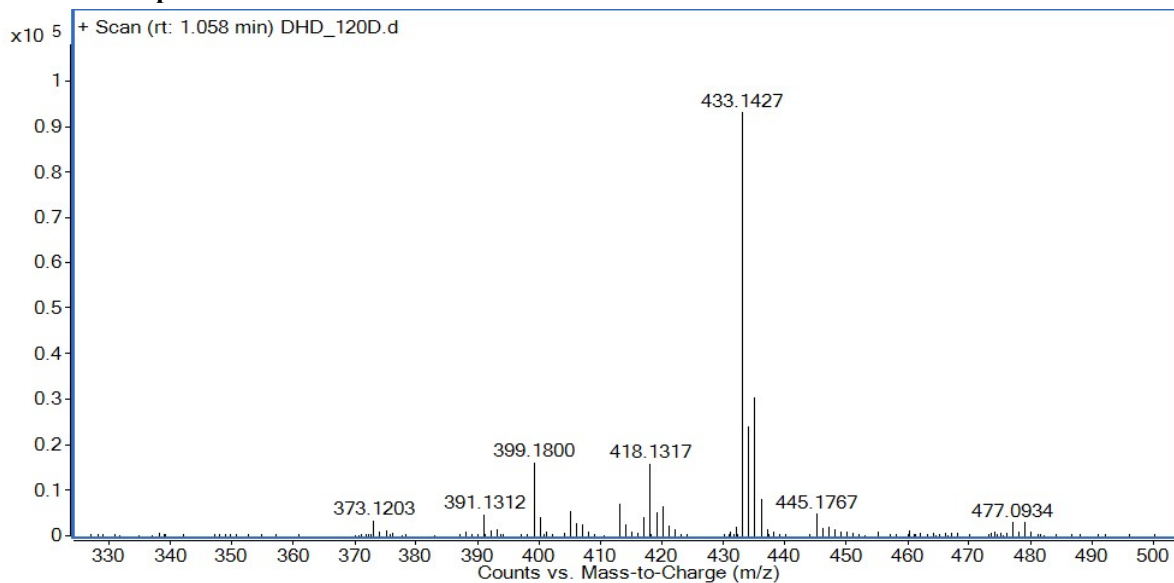

### HRMS of compound 6e

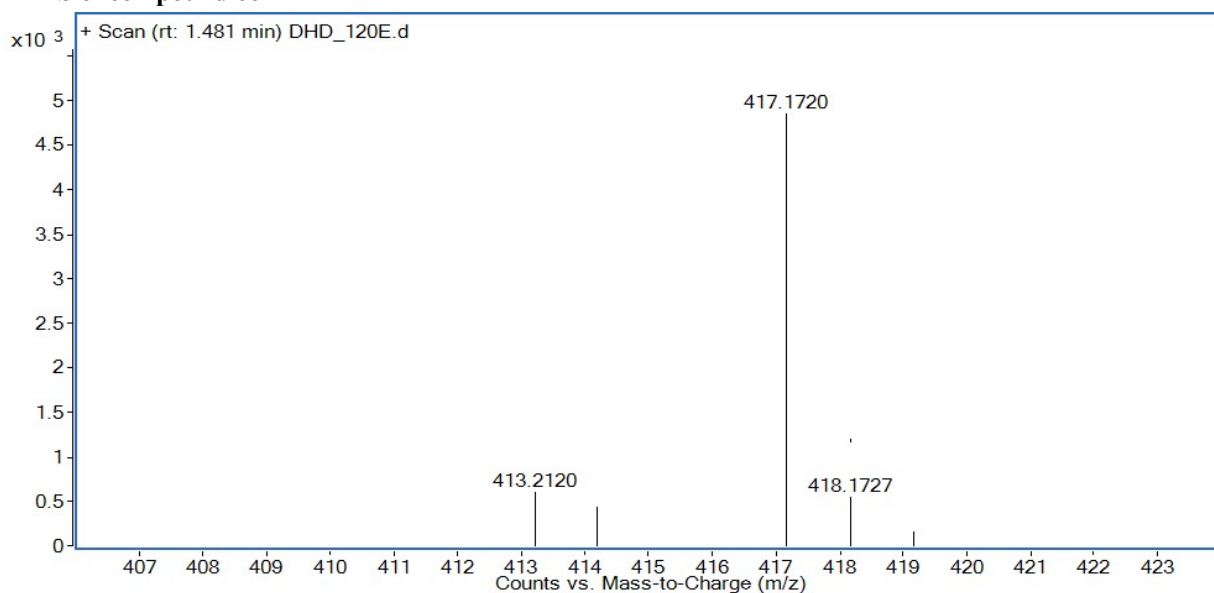

### HRMS of compound 6f

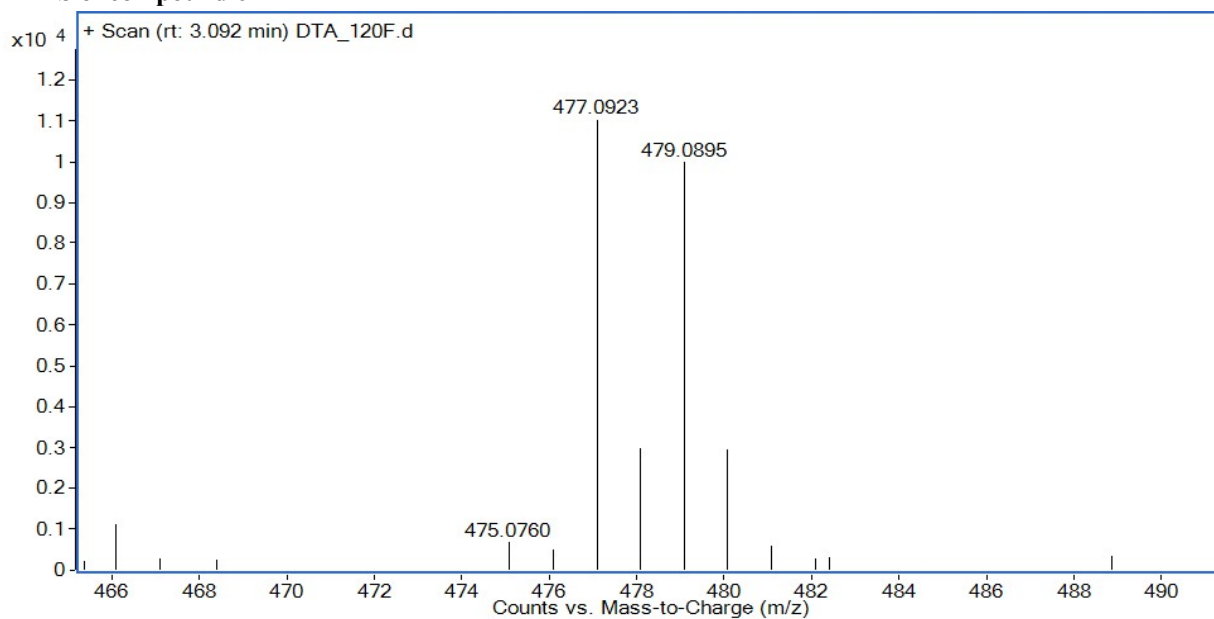



### HRMS of compound 6g

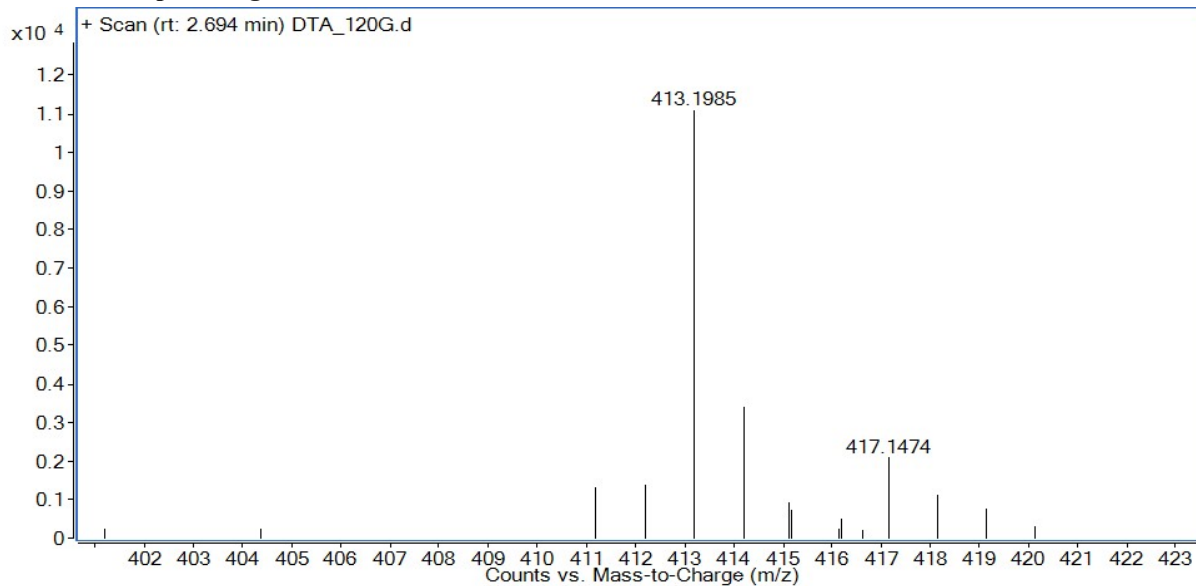

### HRMS of compound 9a

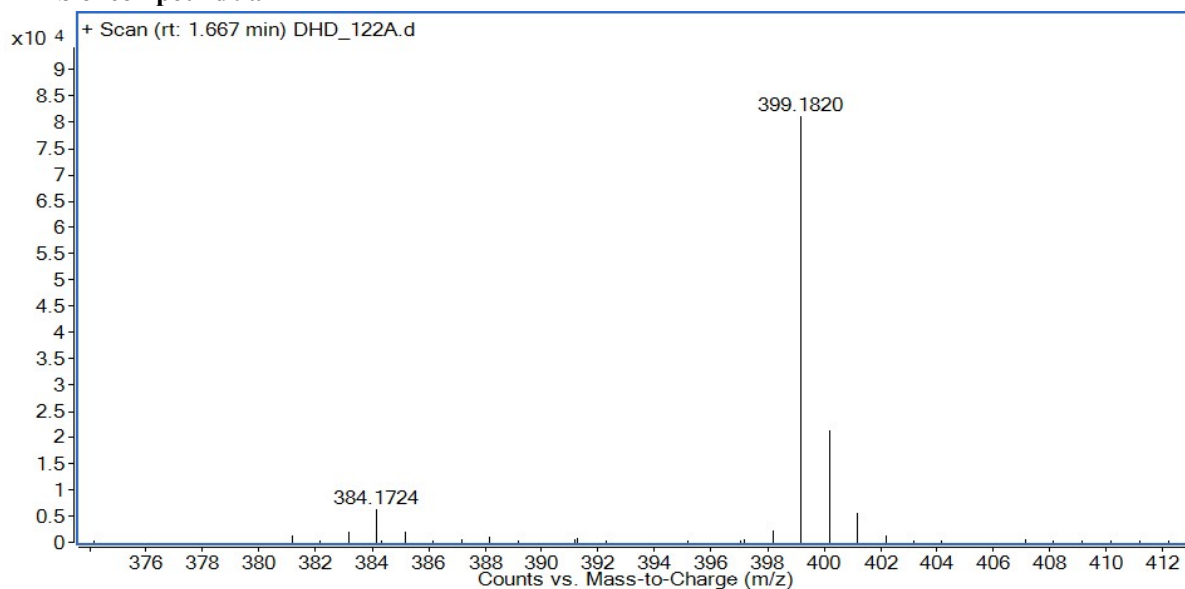

### HRMS of compound 9b

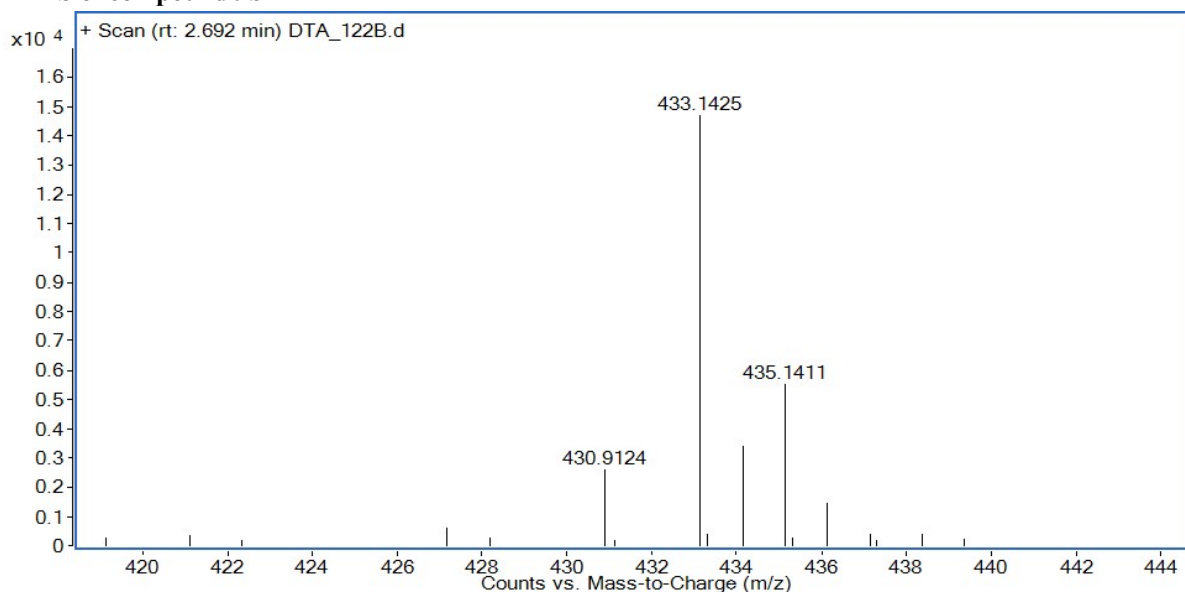

### HRMS of compound 9c

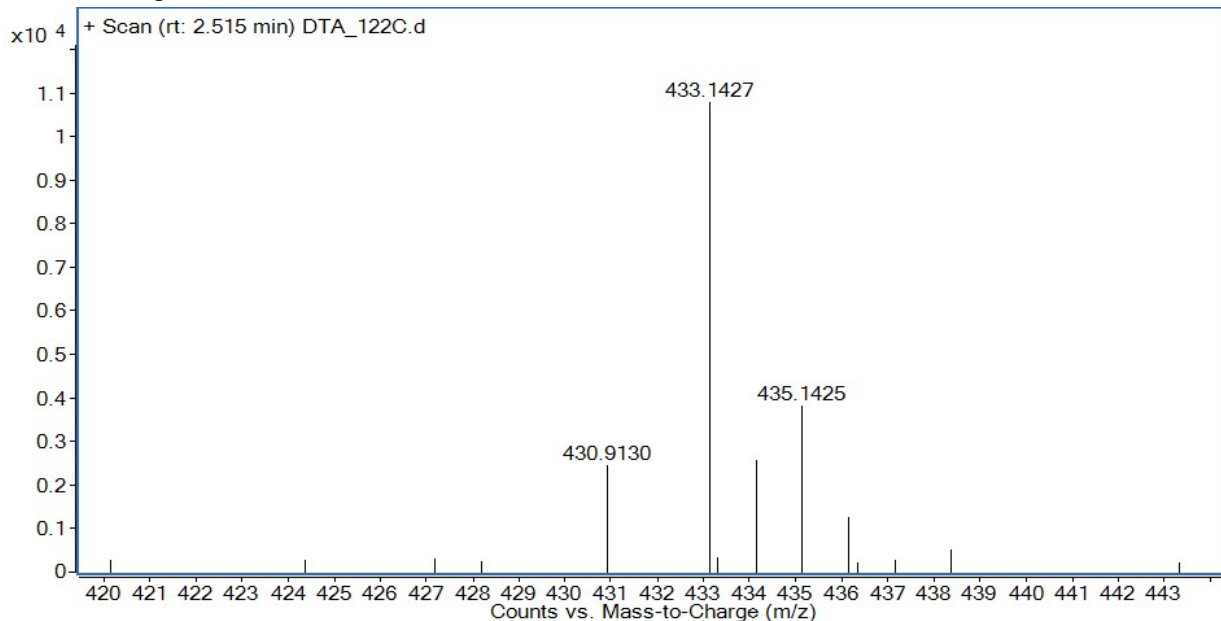

### HRMS of compound 9d

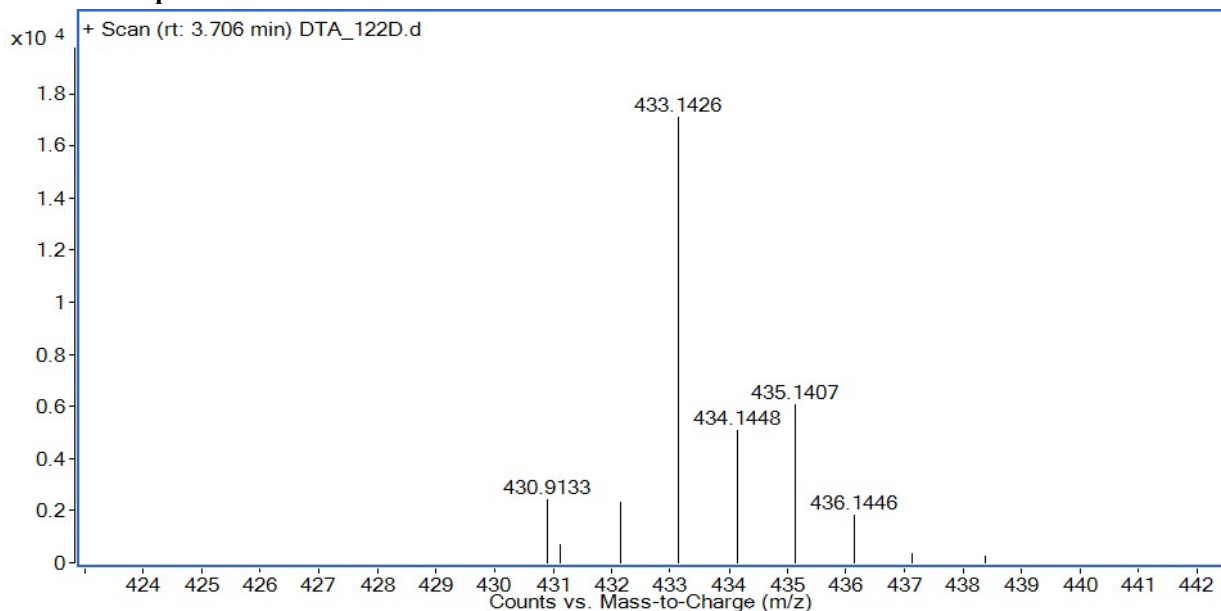

### HRMS of compound 9e

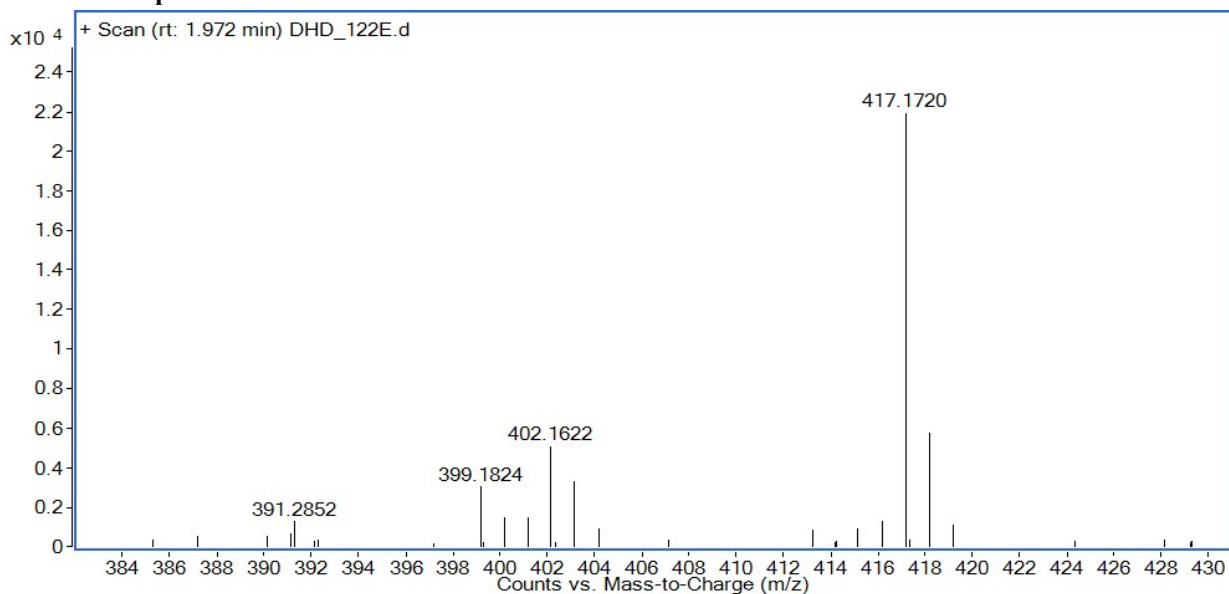

### HRMS of compound 9f

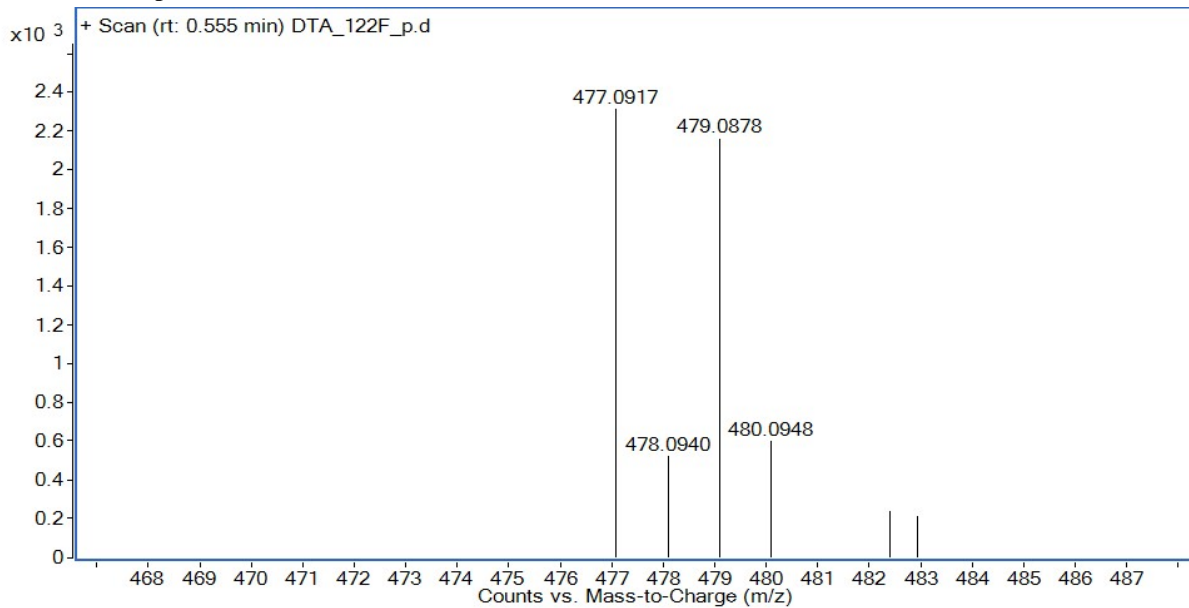

### HRMS of compound 9g

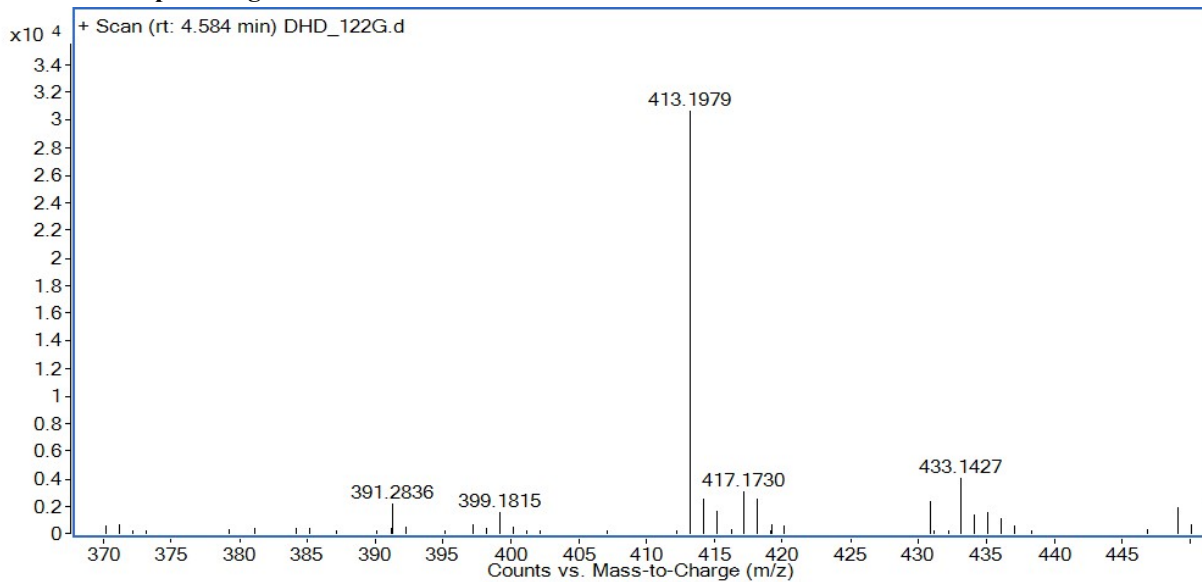

### HRMS of compound 14a

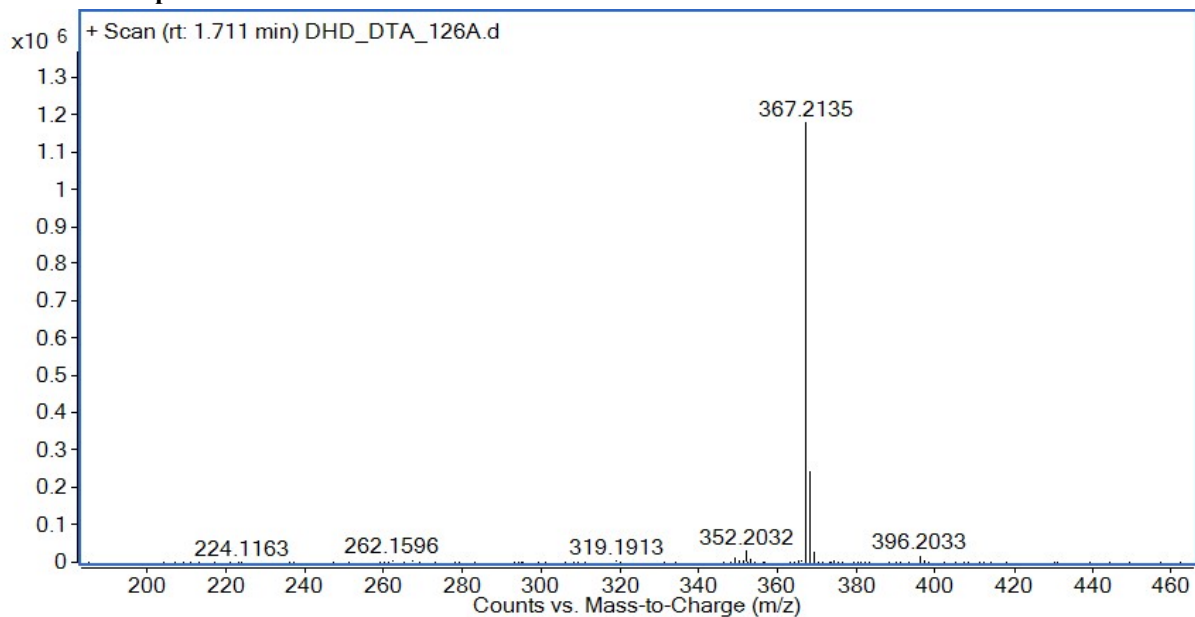

### HRMS of compound 14b

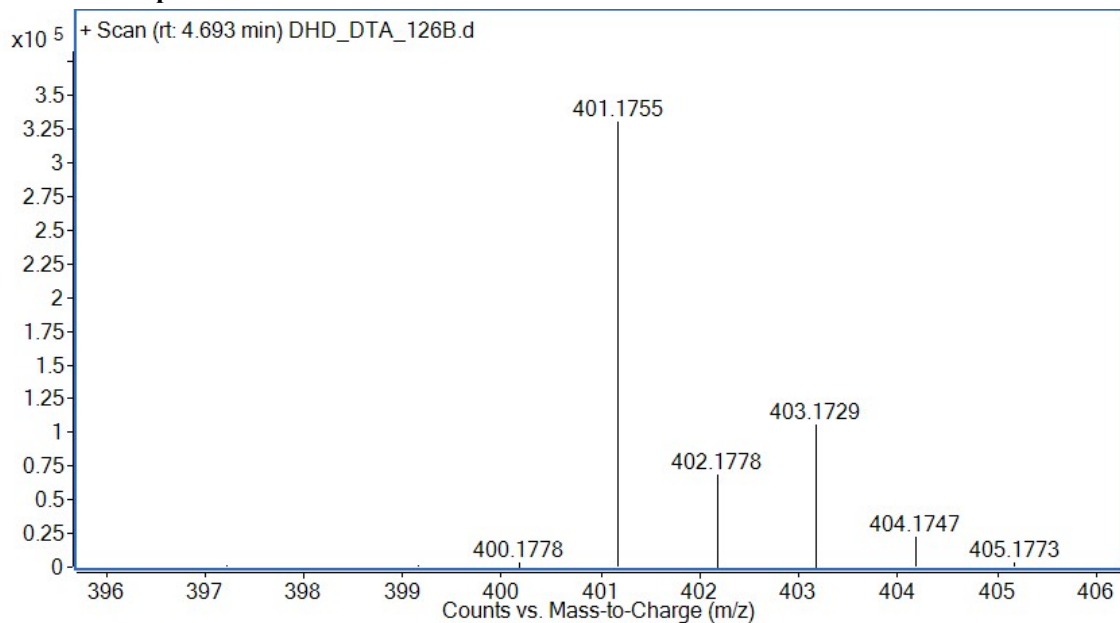

### HRMS of compound 14c

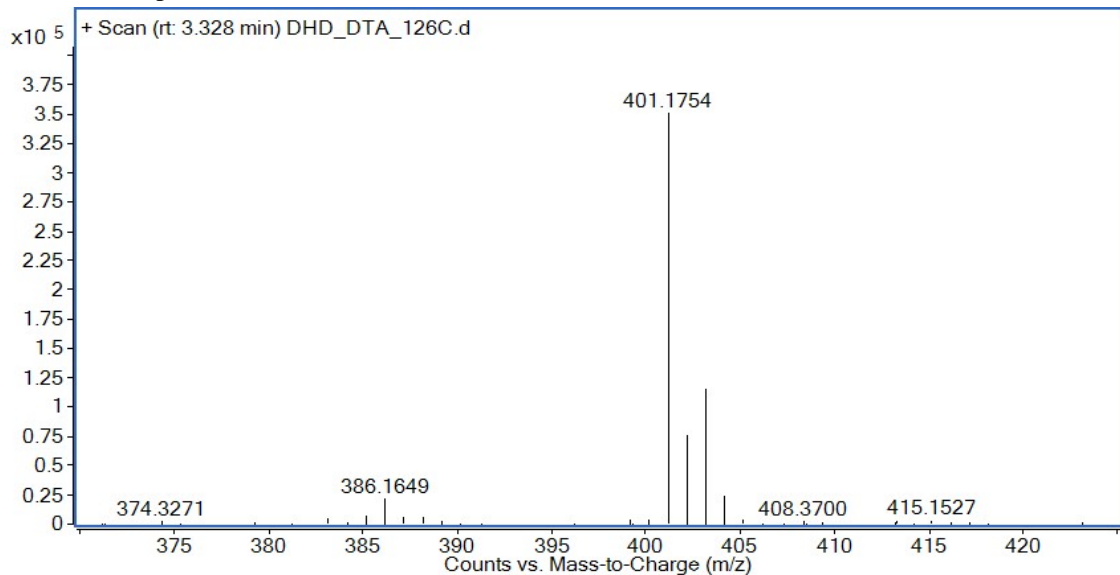

### HRMS of compound 14d

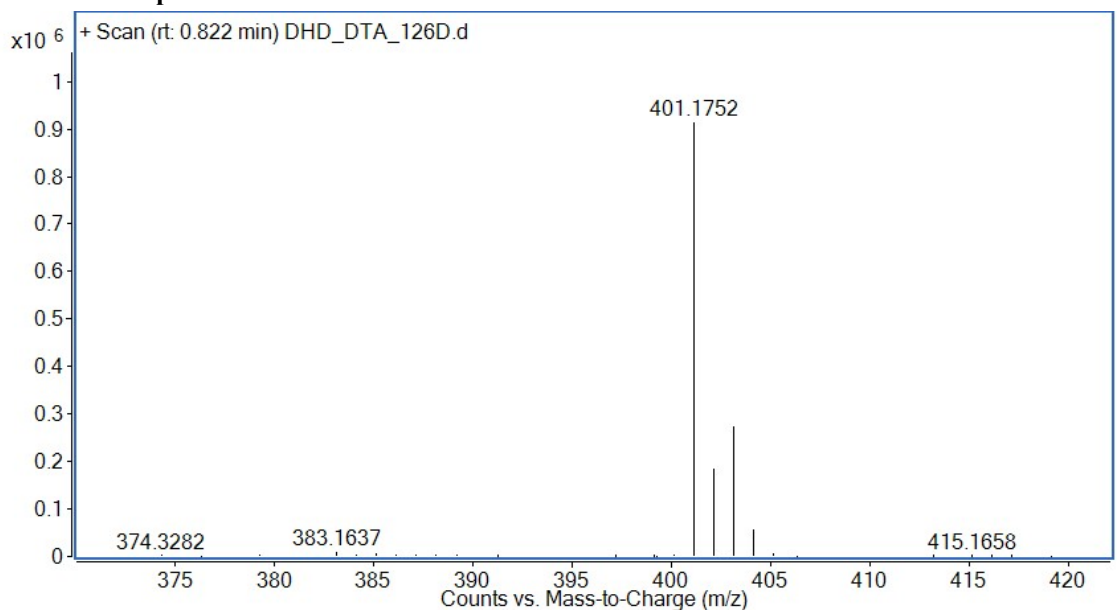

### HRMS of compound 14e

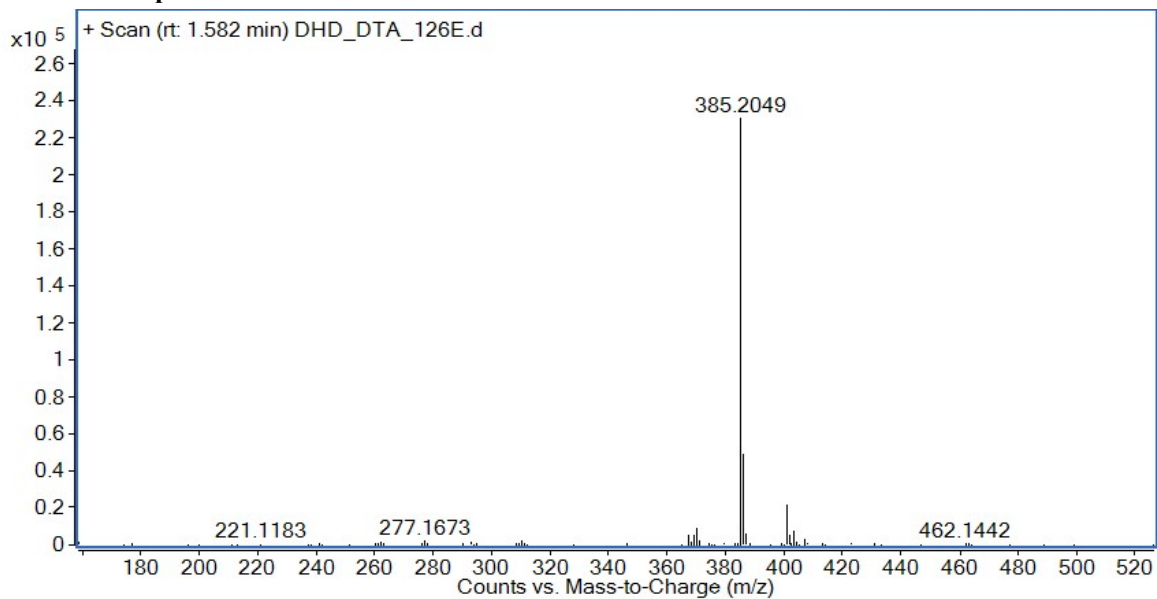

### HRMS of compound 14f

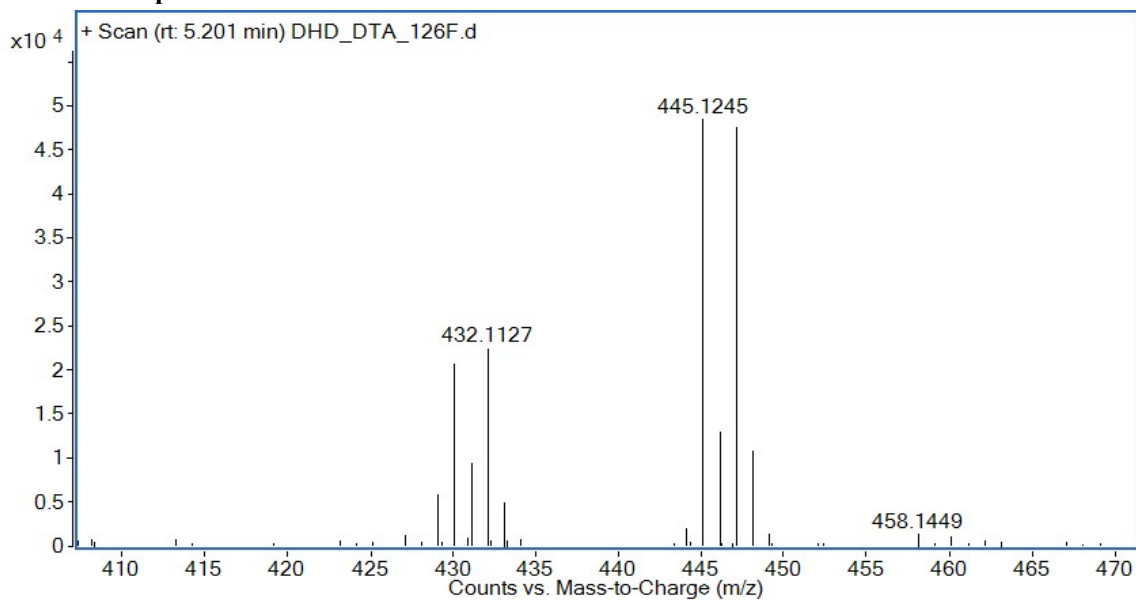

### HRMS of compound 14g

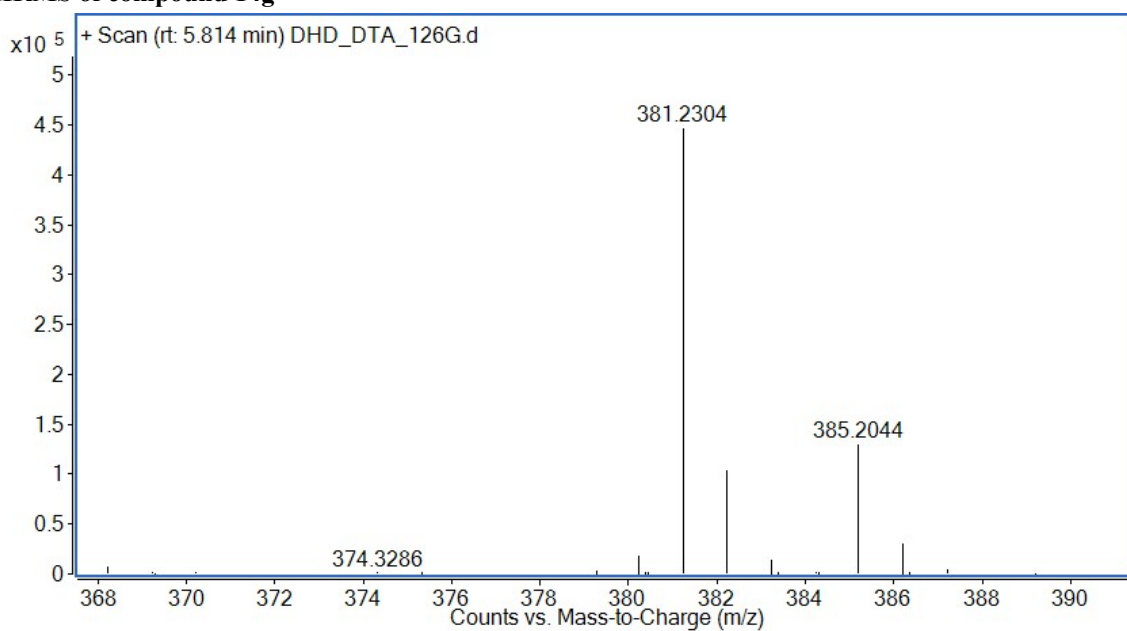

### HRMS of compound 17a

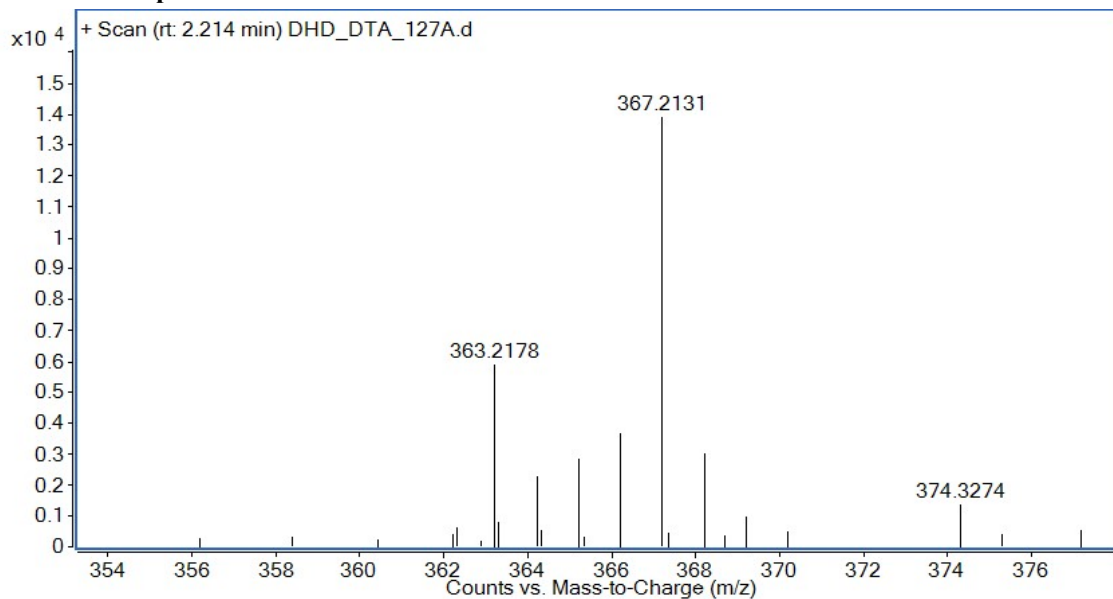

### HRMS of compound 17b

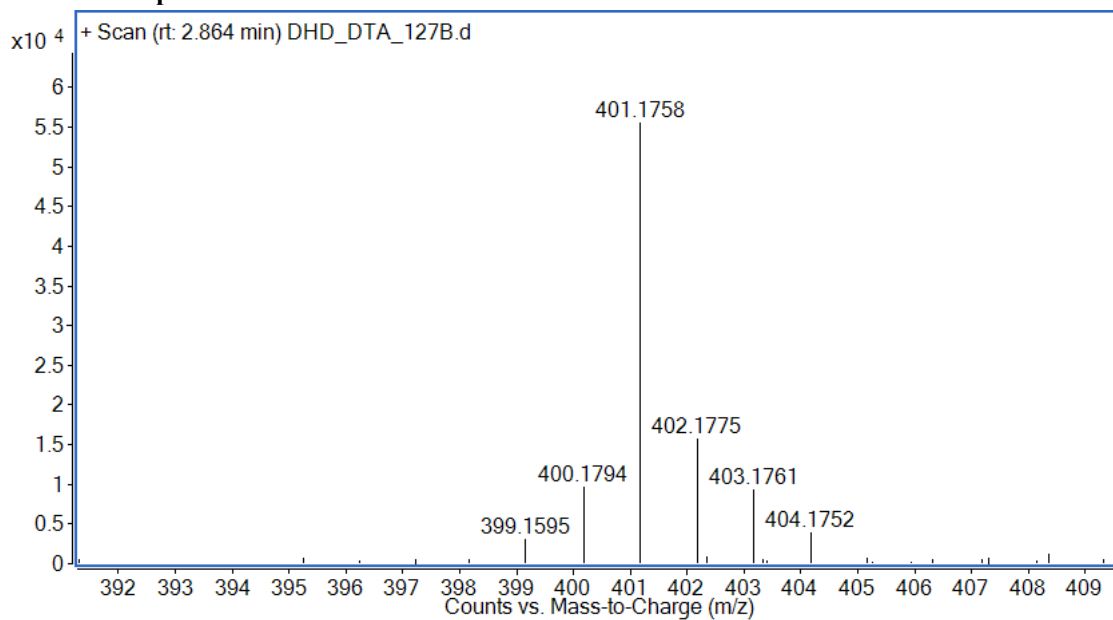

### HRMS of compound 17c

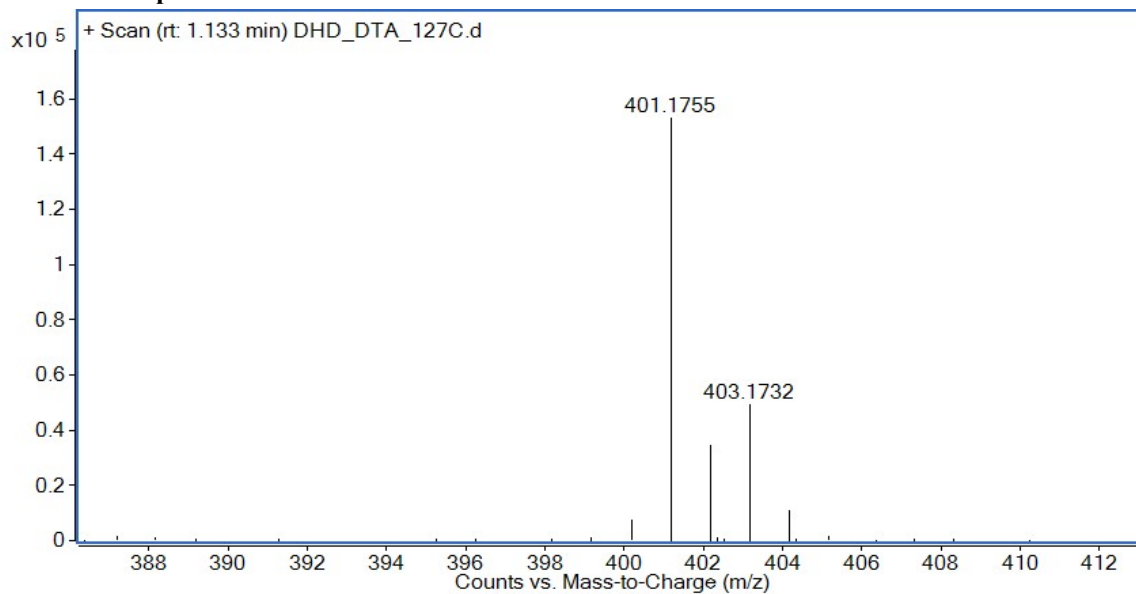

### HRMS of compound 17d

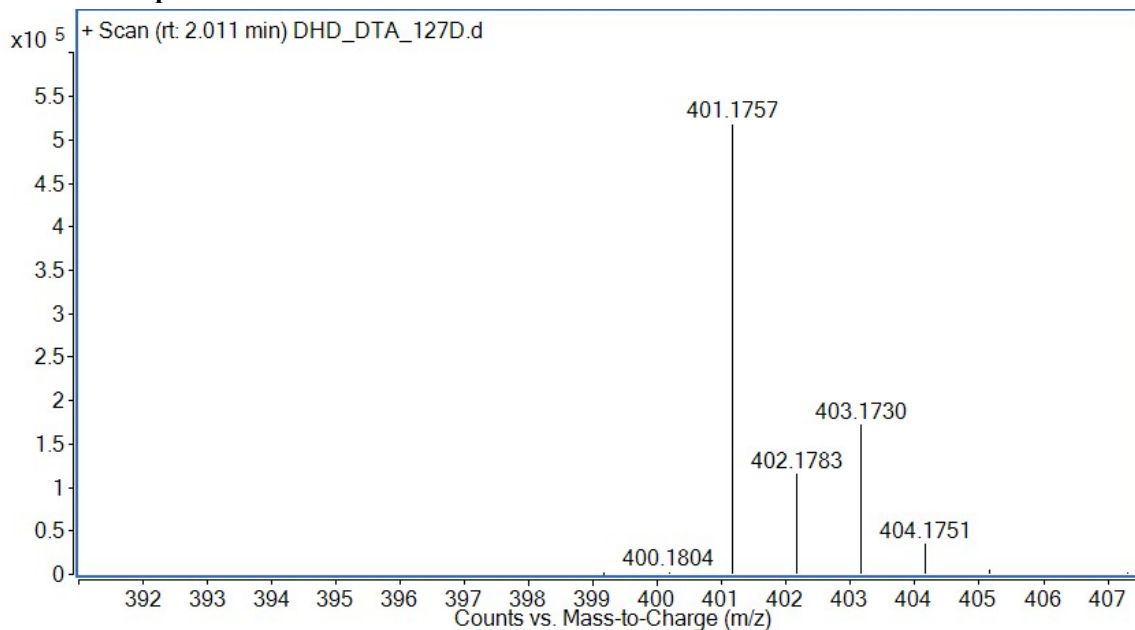

### HRMS of compound 17e

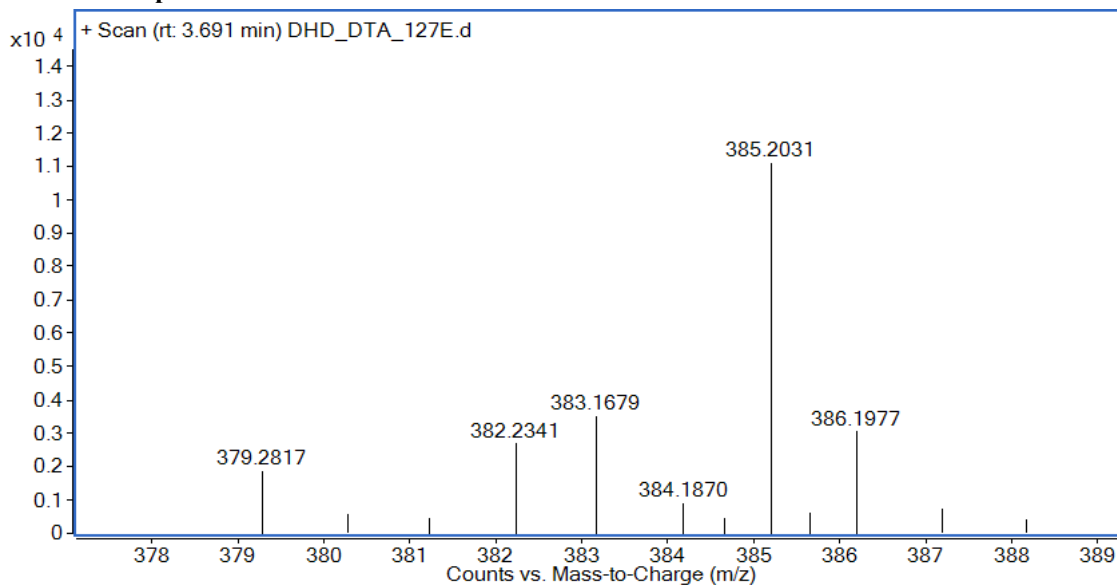

### HRMS of compound 17f

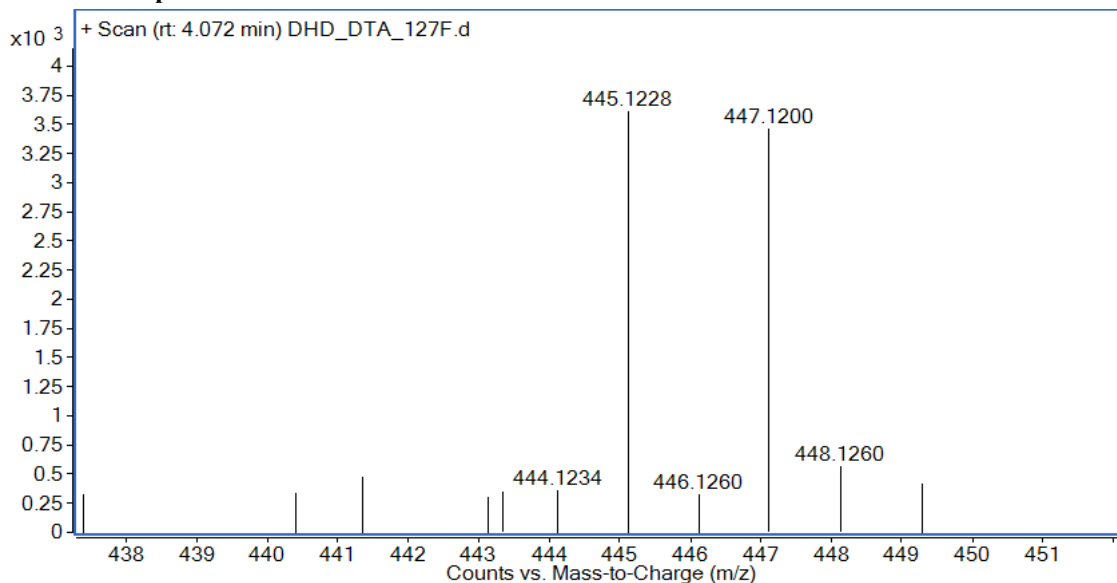

### HRMS of compound 17g

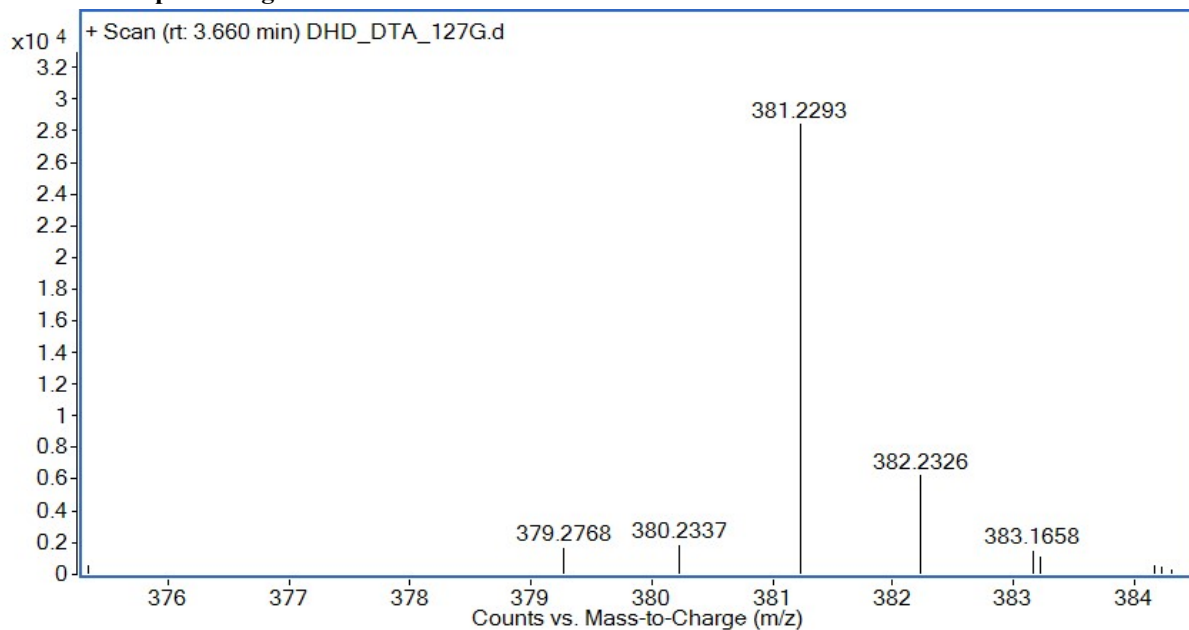

### HRMS of compound 22a

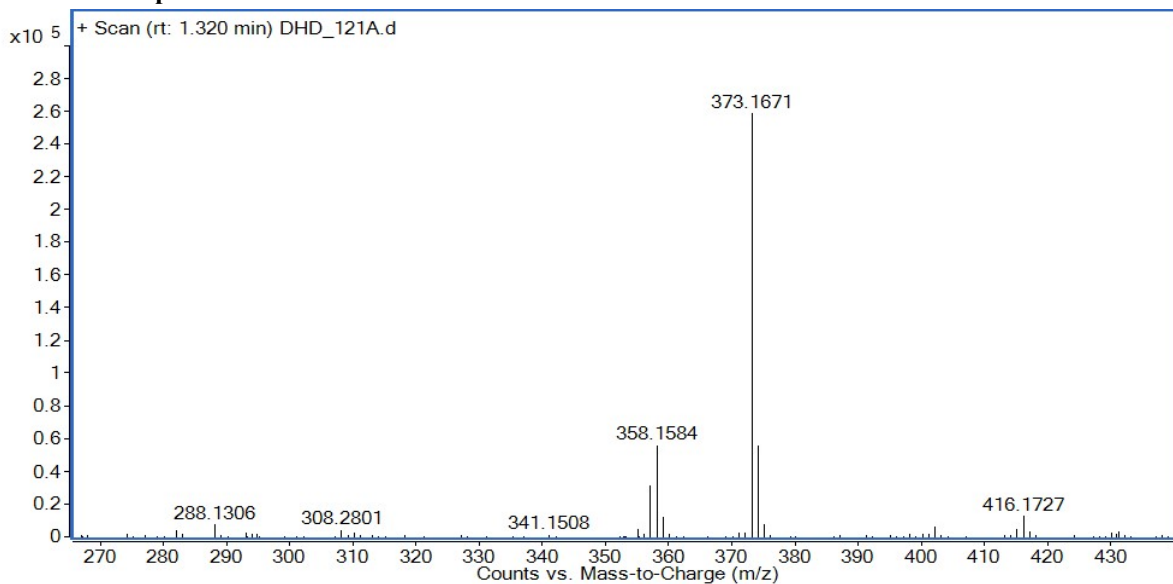

### HRMS of compound 22b

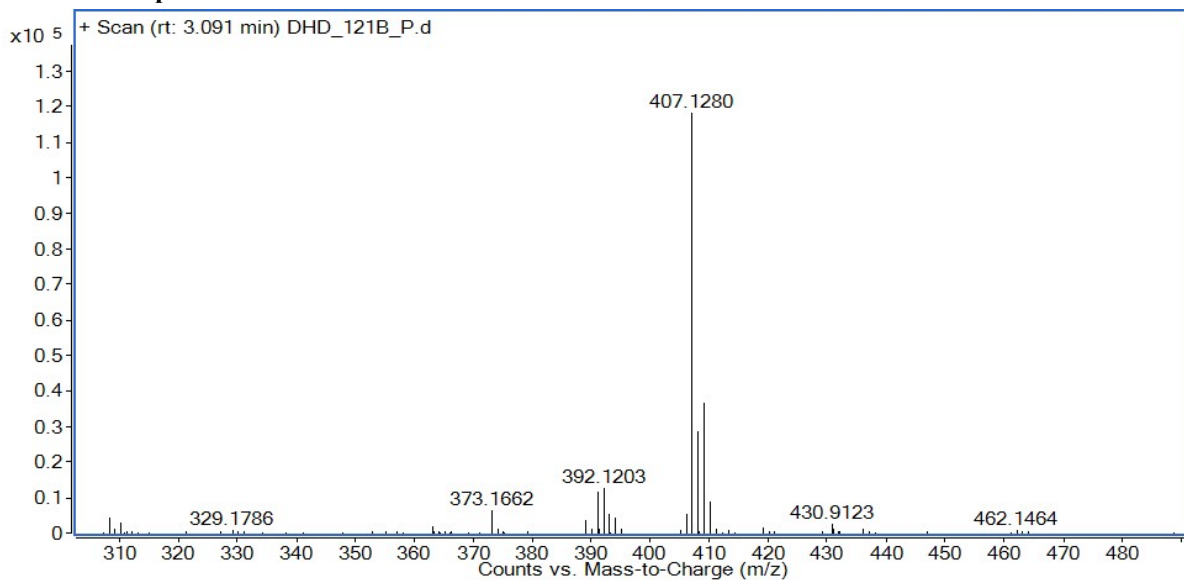



### HRMS of compound 22c

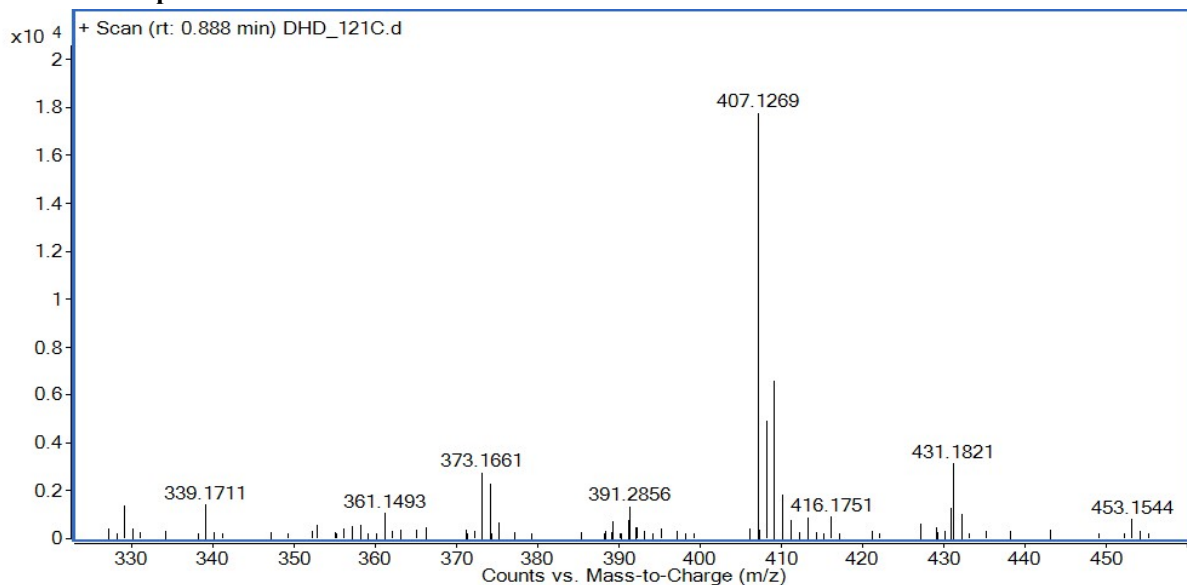

### HRMS of compound 22d

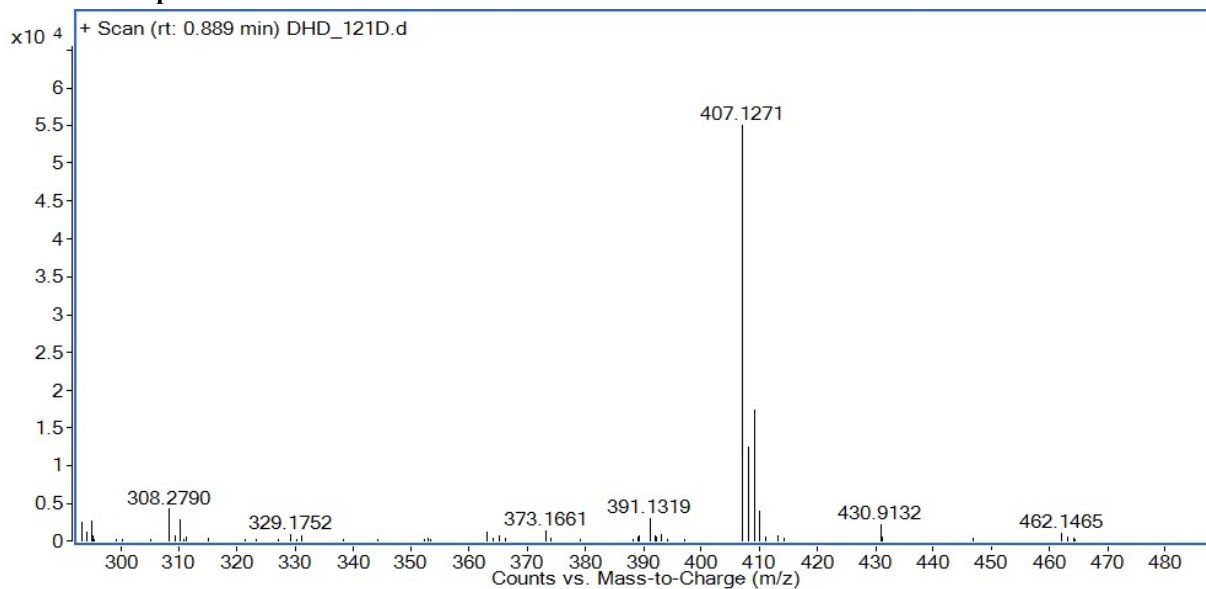

### HRMS of compound 22e

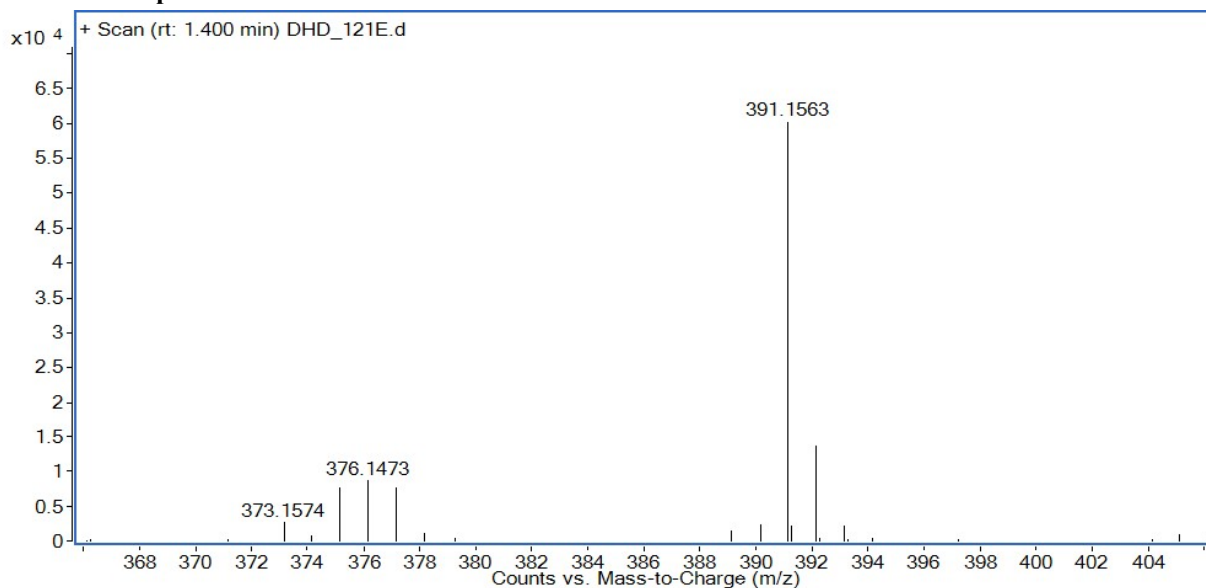

### HRMS of compound 22f

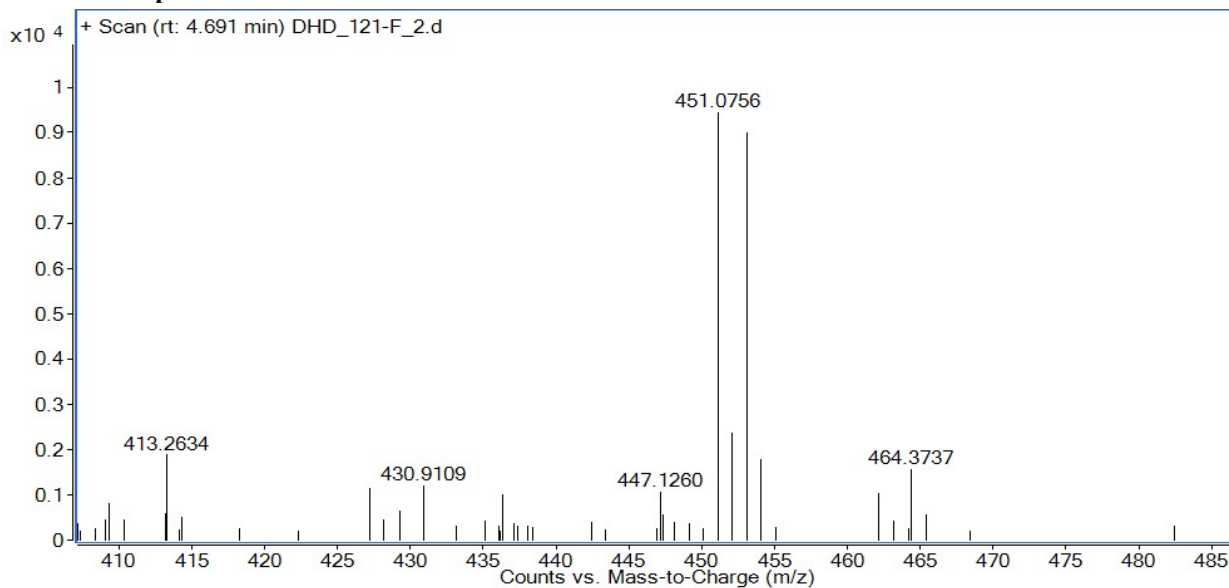

### HRMS of compound 22g

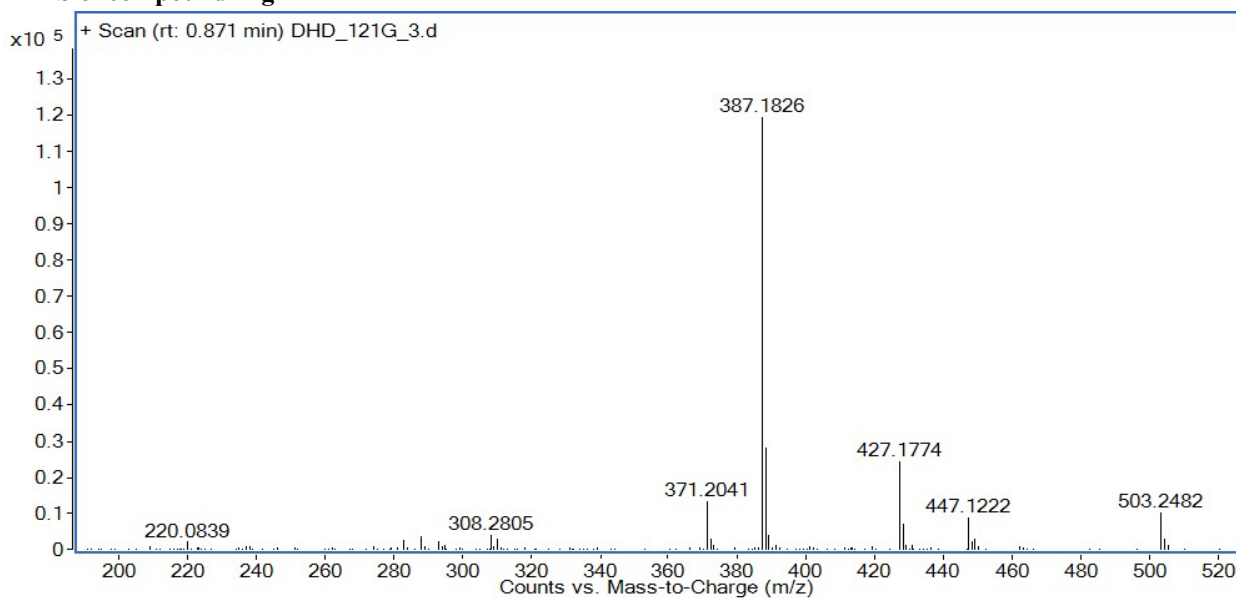

### HRMS of compound 25a

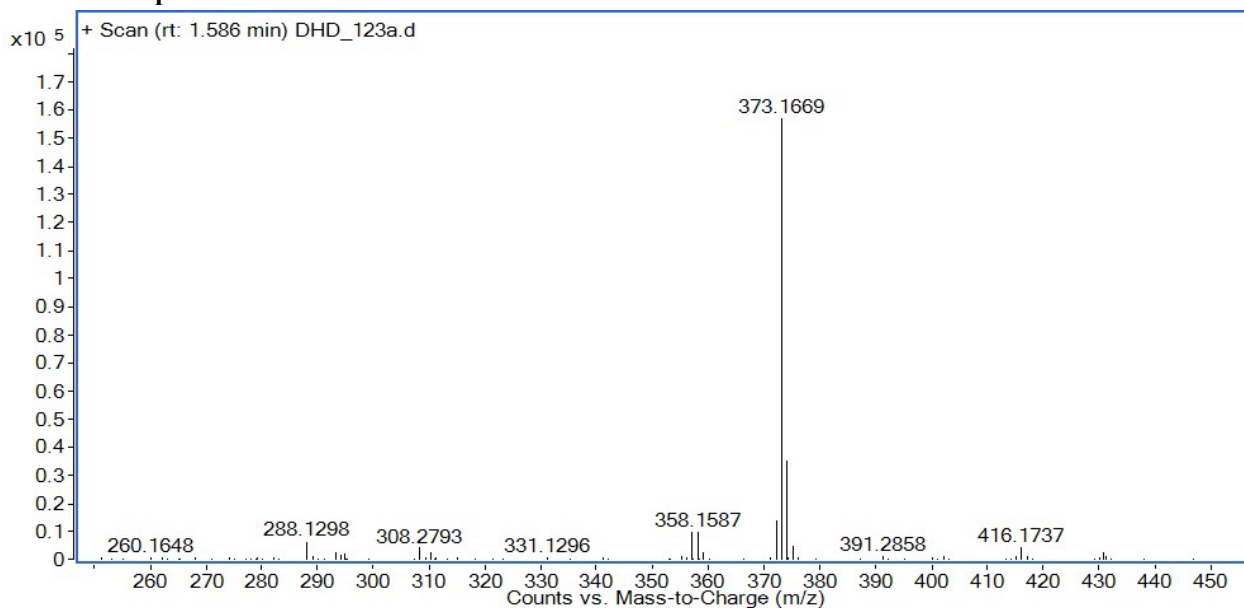

### HRMS of compound 25b

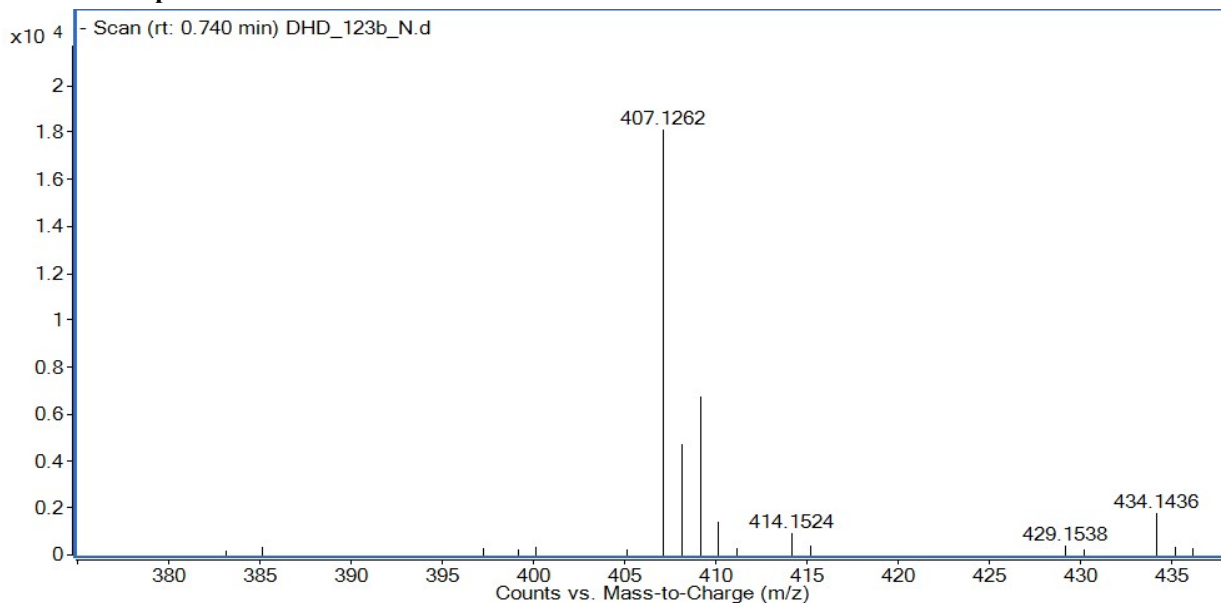

### HRMS of compound 25c

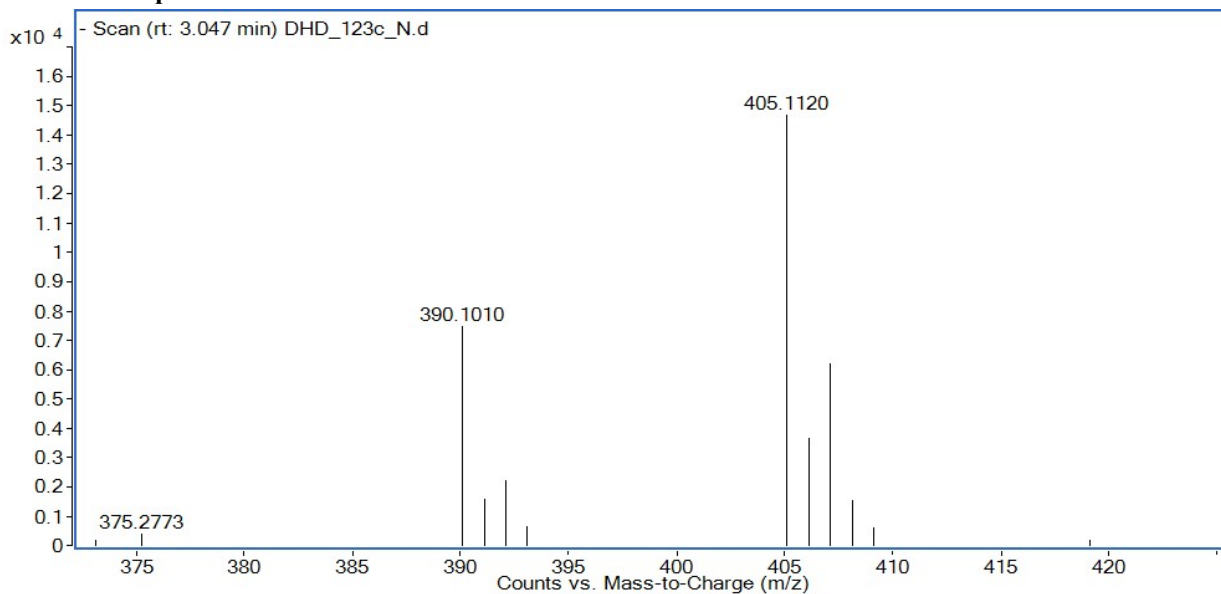

### HRMS of compound 25d

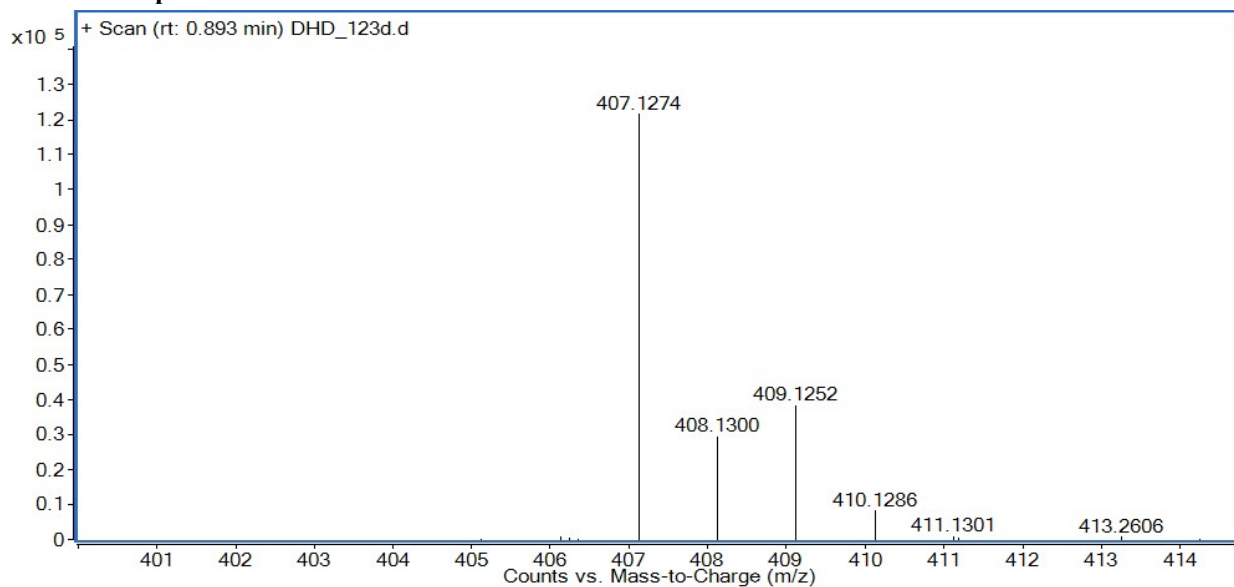

### HRMS of compound 25e

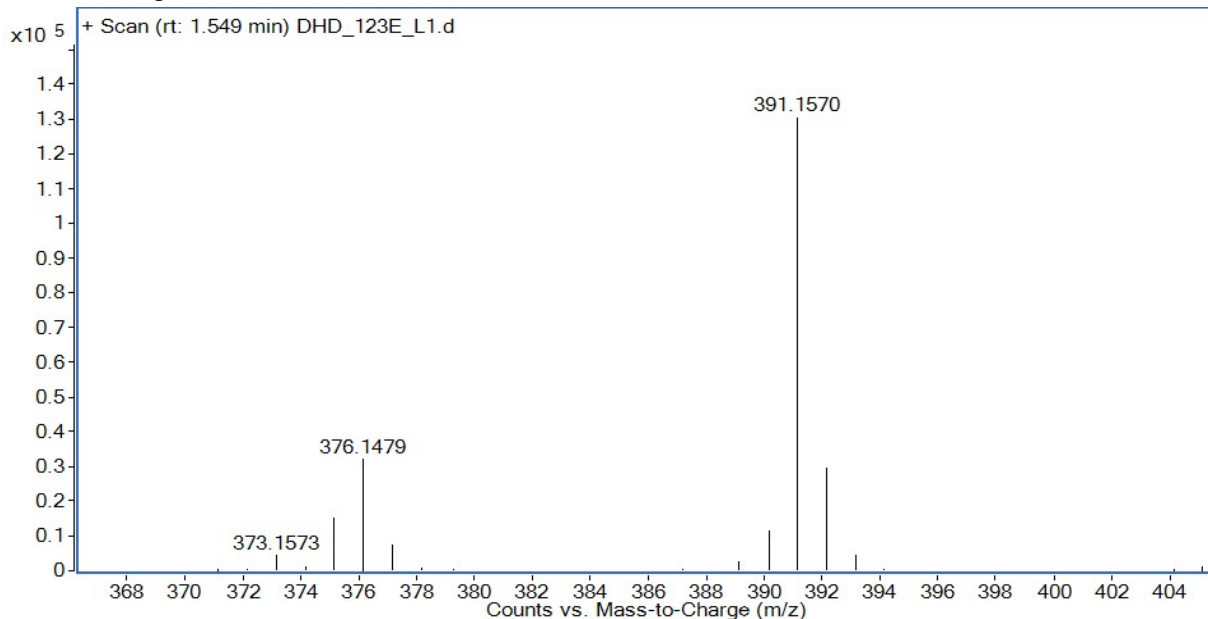

### HRMS of compound 25f

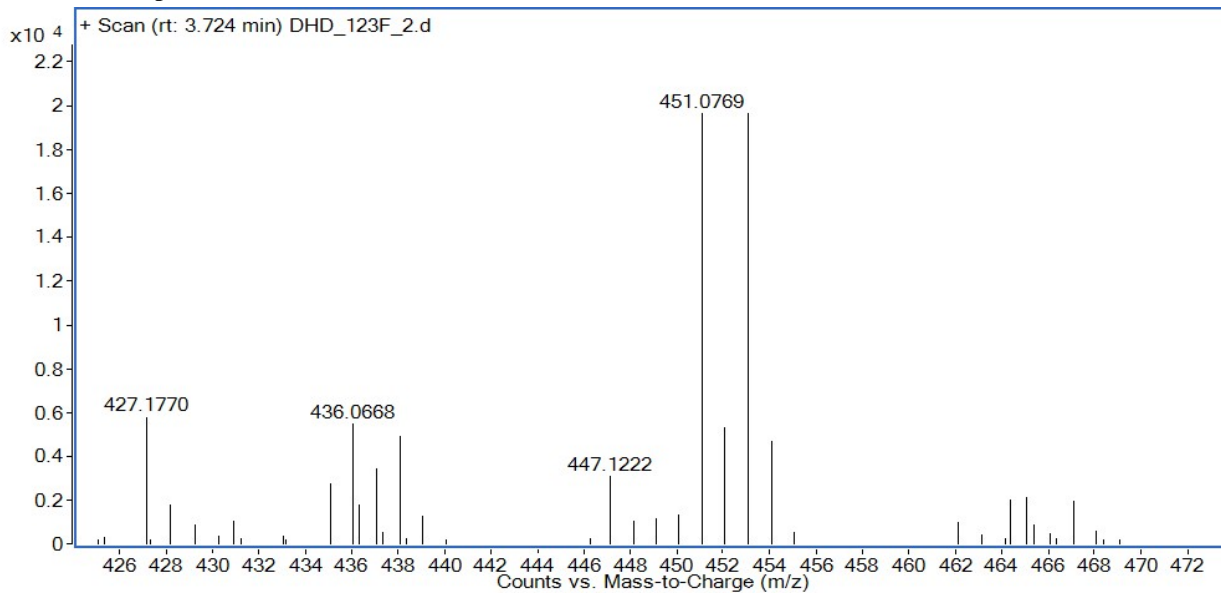

### HRMS of compound 25g

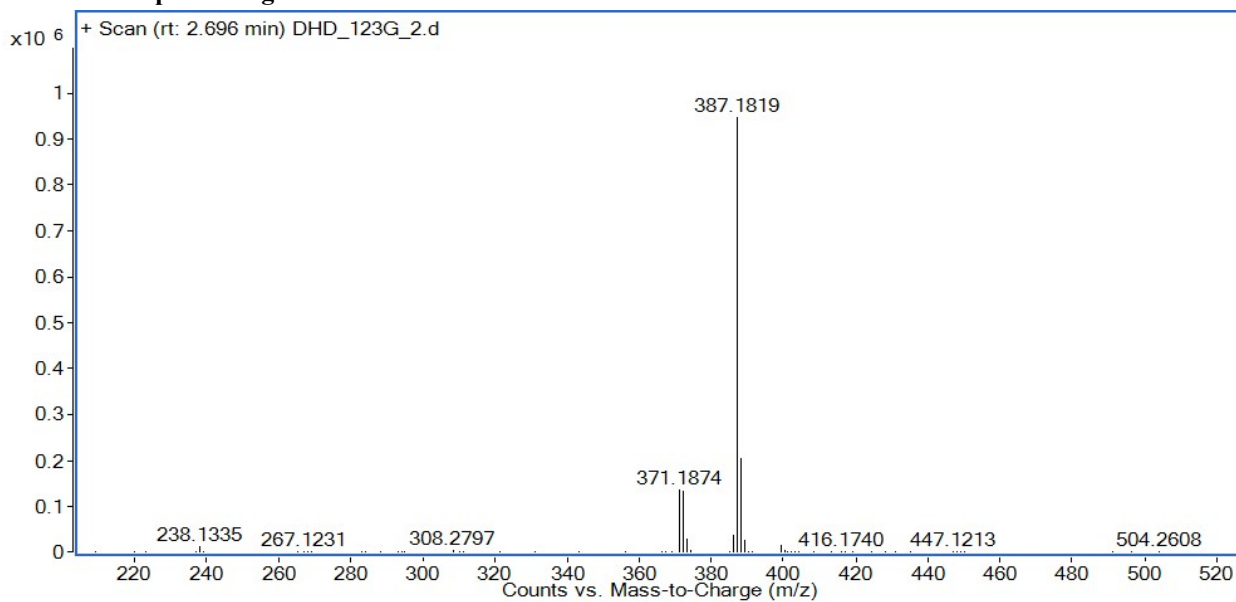

### HRMS of compound 27a

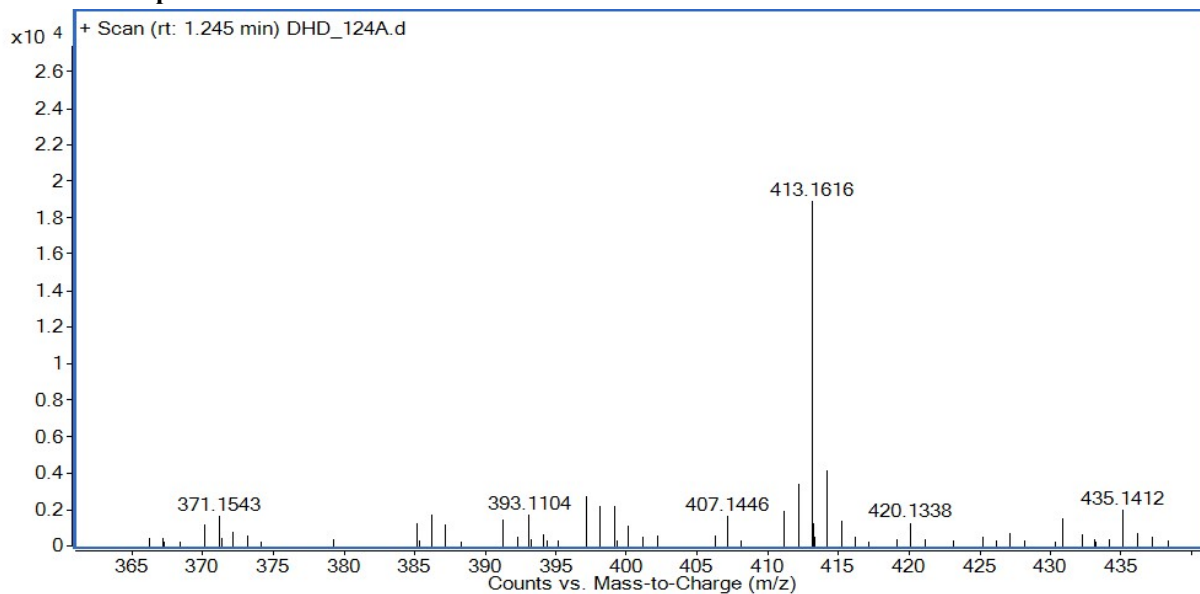

### HRMS of compound 27b

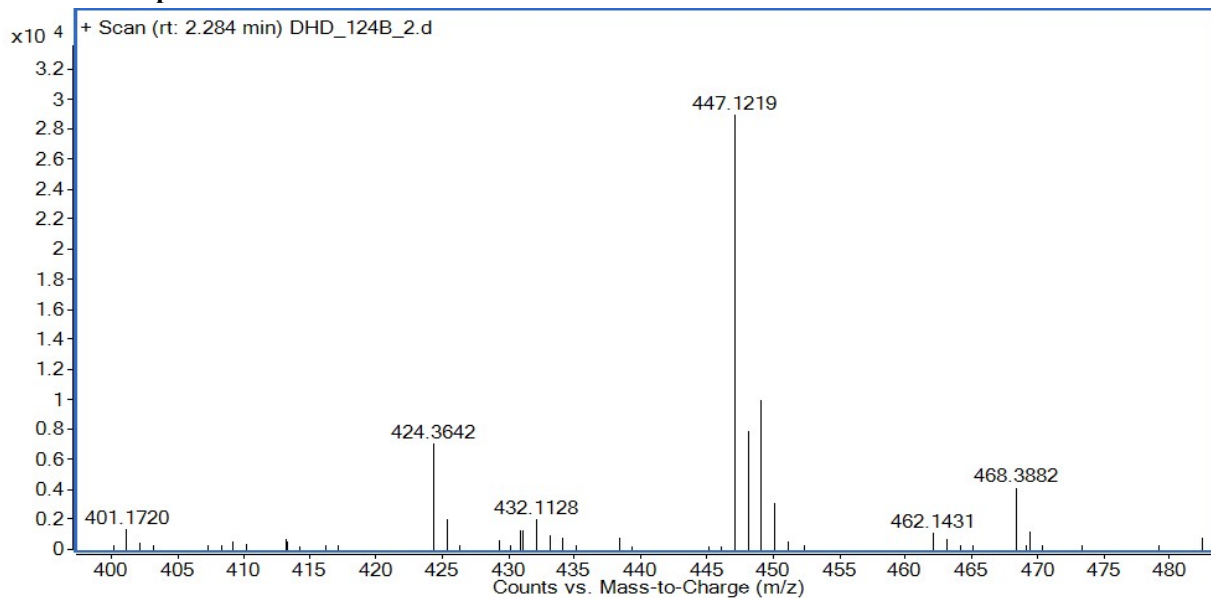

### HRMS of compound 27c

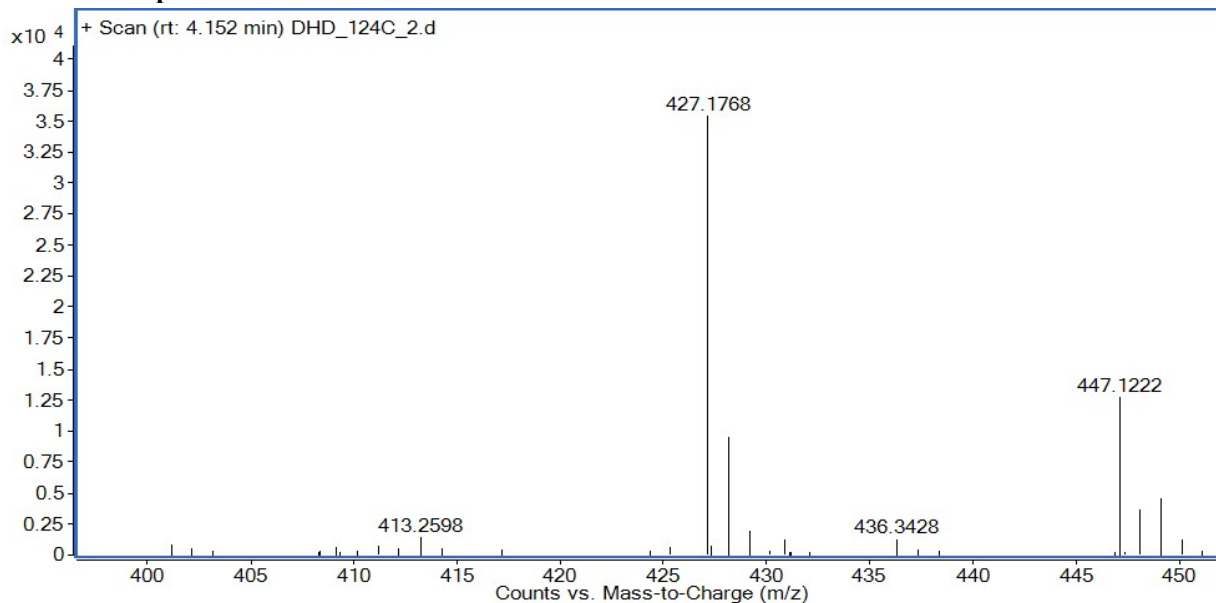

### HRMS of compound 29a

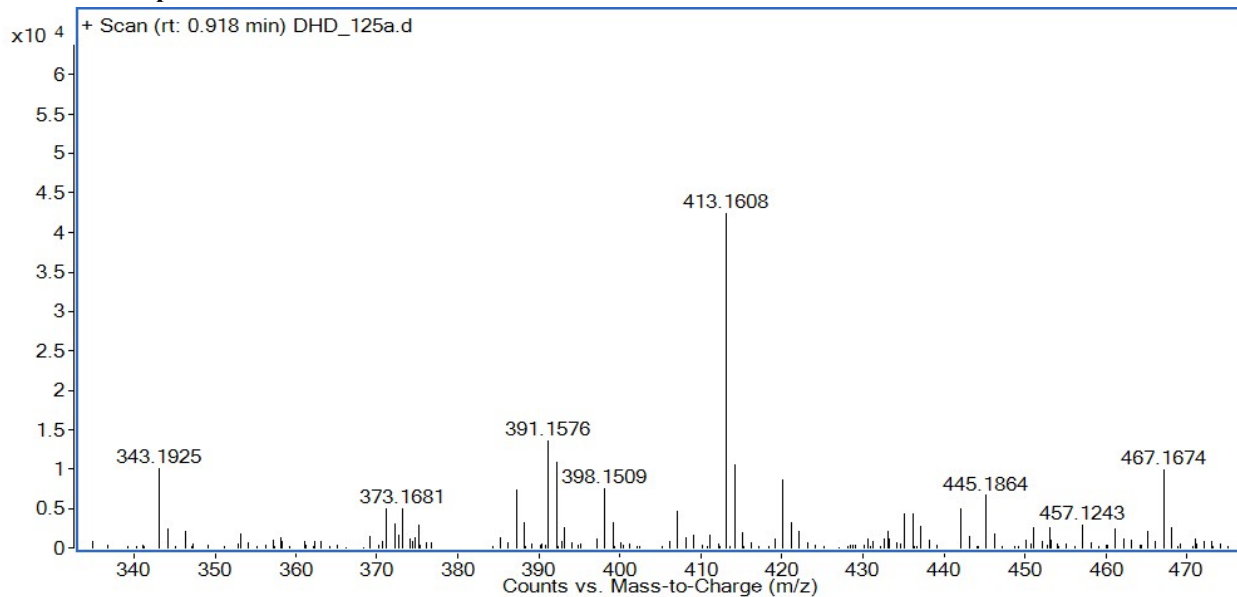

### HRMS of compound 29b

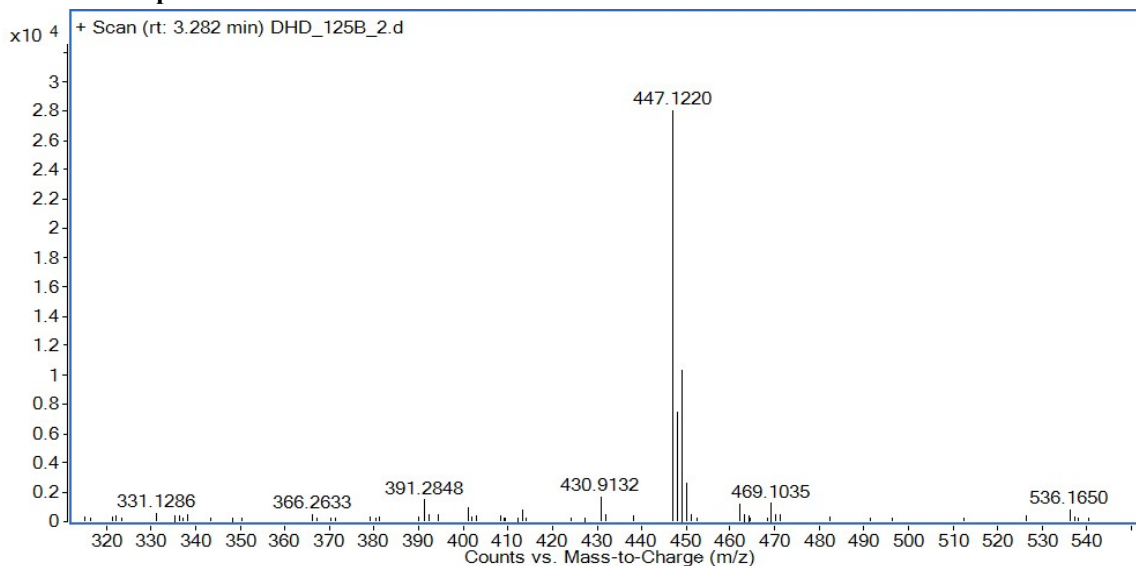

### HRMS of compound 29c

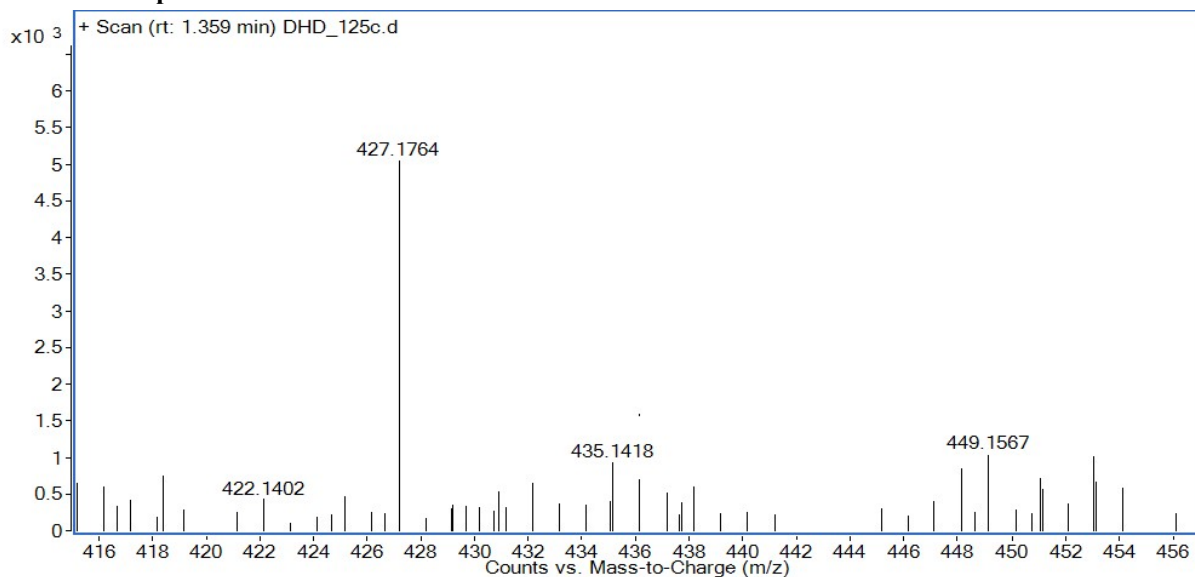

### HRMS of compound 31a

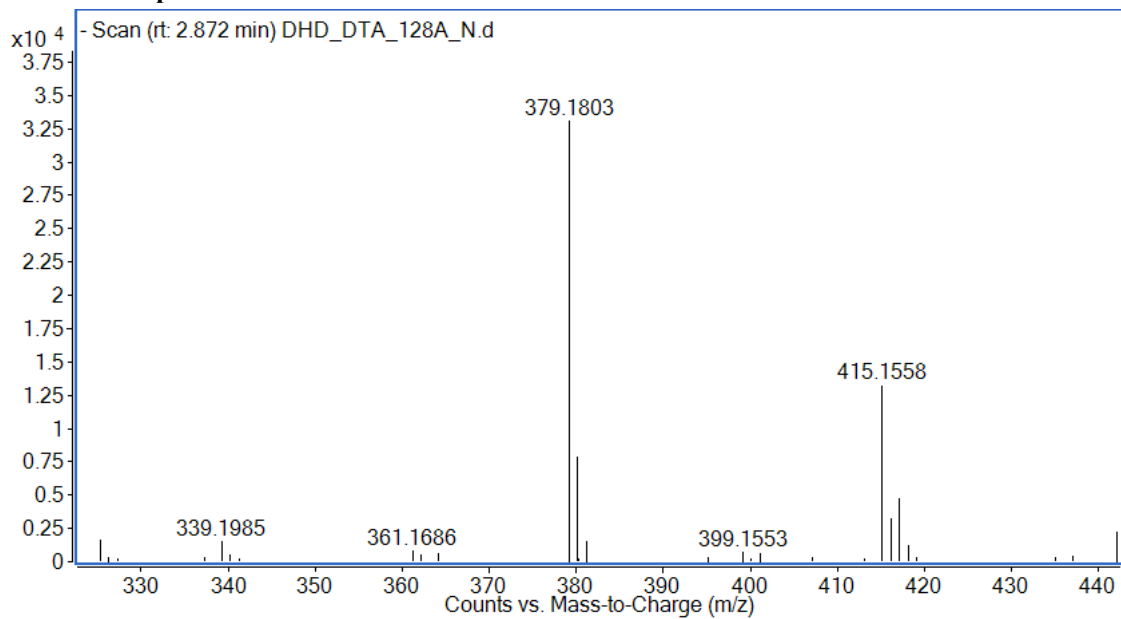

### HRMS of compound 31b

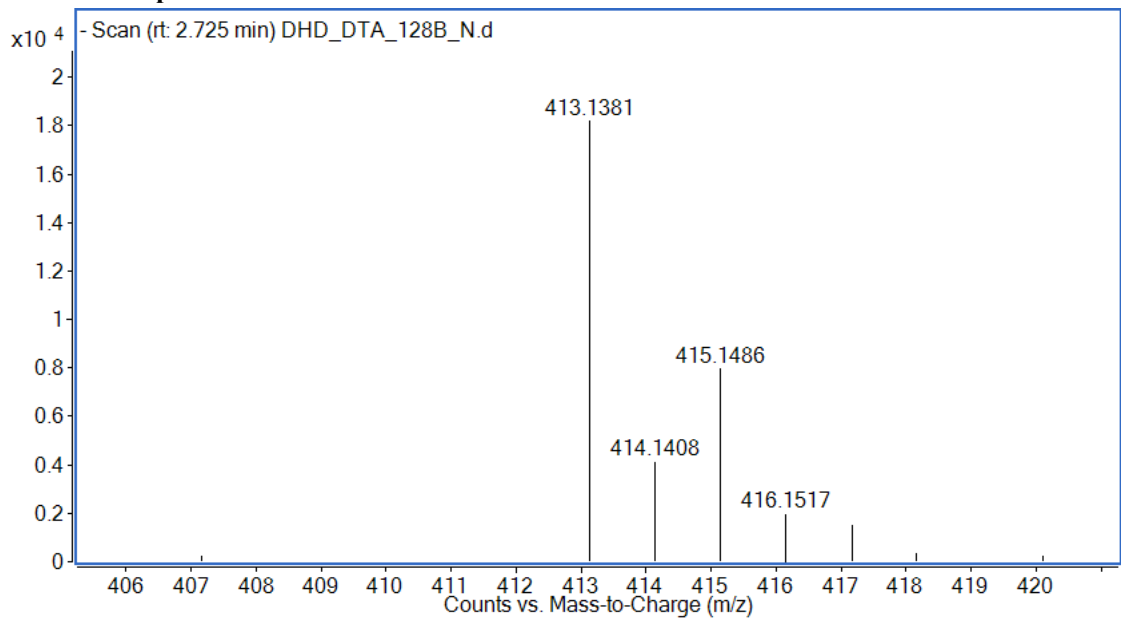

### HRMS of compound 31c

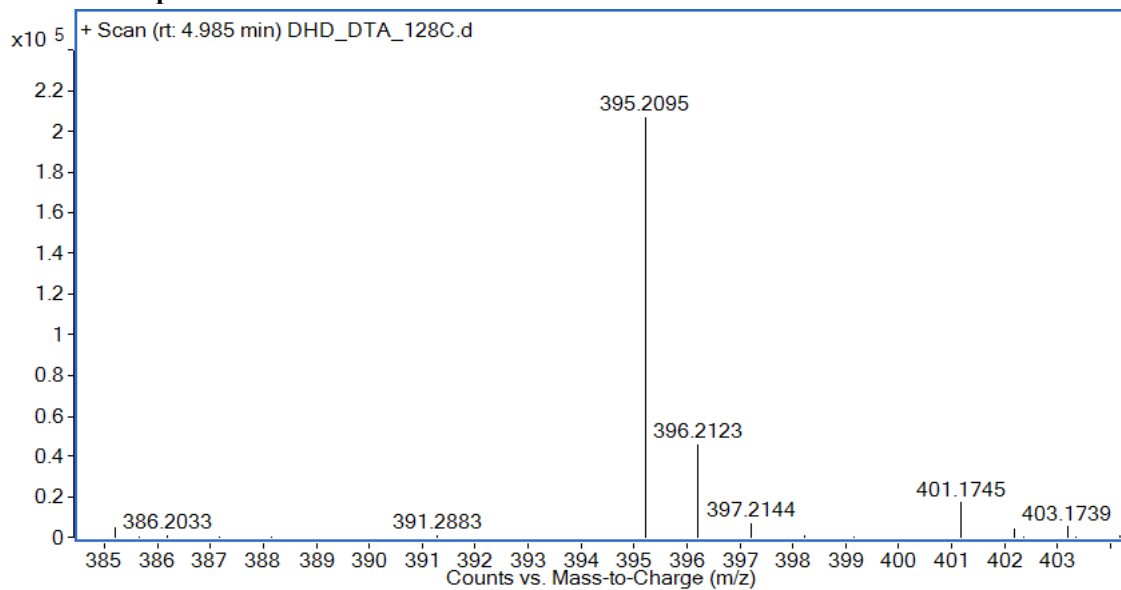

### HRMS of compound 33a

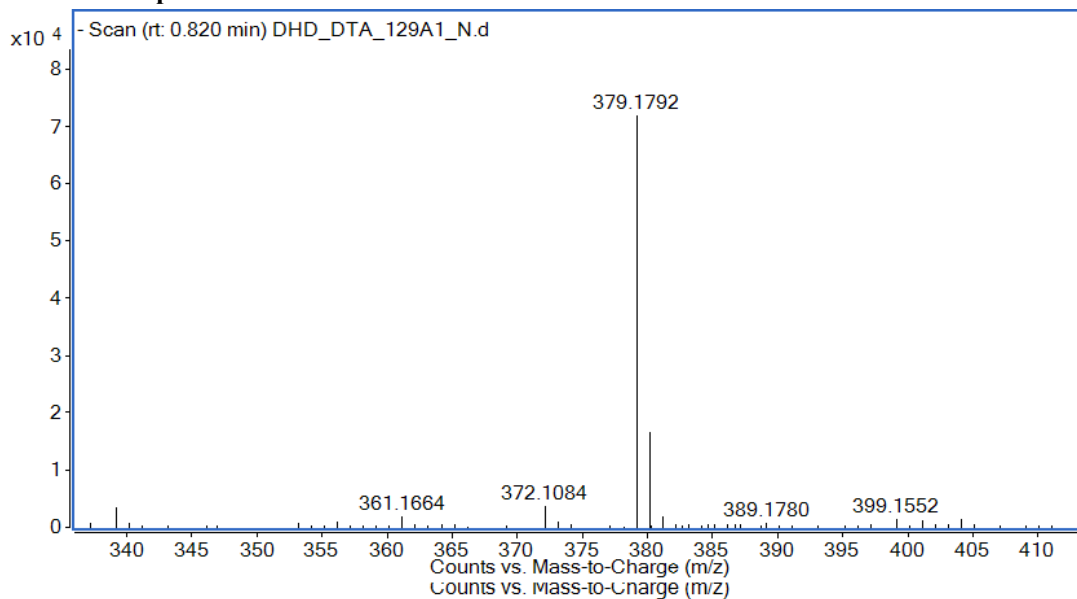

### HRMS of compound 33b

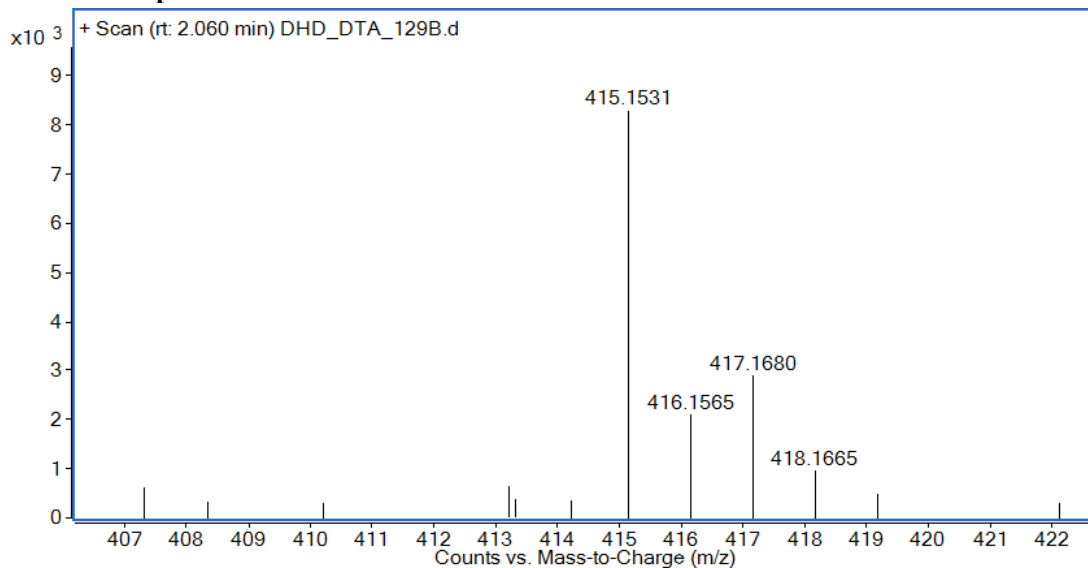

### HRMS of compound 33c

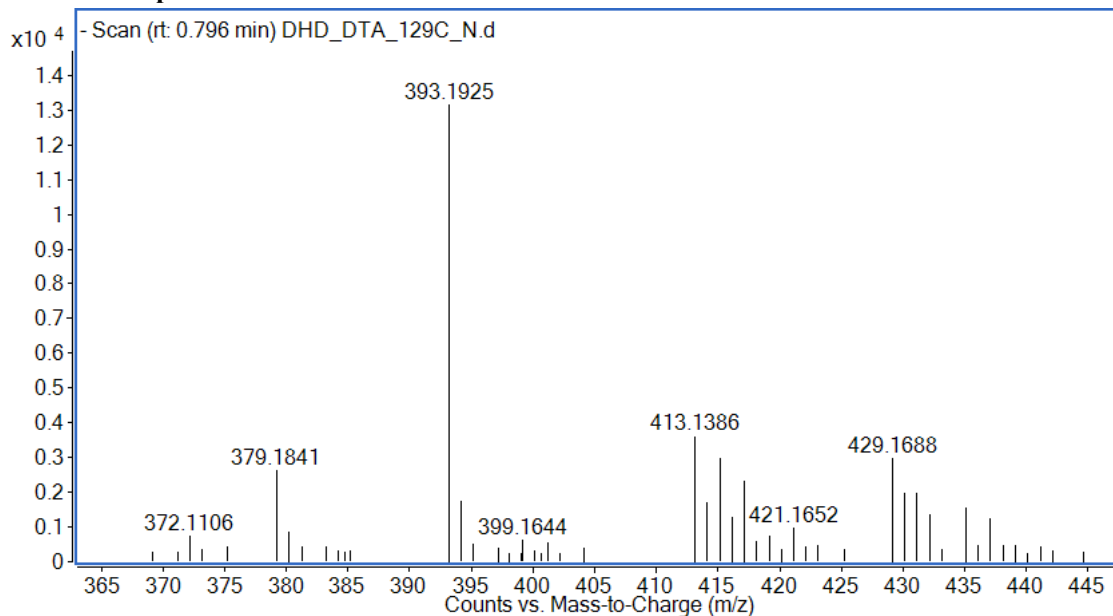

Supplement: d4nj03452j1.pdf [file d4nj03452j1.pdf]
